# Supplementary material
Source: publisher site journal article supplement (https://www.spandidos-publications.com/2964/downloadSupplementary)
Supplement: Supplementary file 1 [file downloadSupplementary]

## Sheet: 2VS0-adj.P.value<0.05-|logFC|>1
List of DEGs in CVSMCs cultured for 2 days in calcified medium
Gene.symbol	Gene name	logFC	adj.P.Val
CXCL8	C-X-C motif chemokine ligand 8	-4.17	1.27e-07
DIRAS3	DIRAS family GTPase 3	-3.99	8.09e-08
CCL2	C-C motif chemokine ligand 2	-3.8	2.22e-07
MMP1	matrix metallopeptidase 1	-3.77	6.87e-05
IL1B	interleukin 1 beta	-3.55	2.47e-06
SOST	sclerostin	-3.28	1e-07
PLAU	plasminogen activator, urokinase	-3.22	5.56e-08
ALDH1A3	aldehyde dehydrogenase 1 family member A3	-3.22	6.13e-08
ANXA10	annexin A10	-2.94	3.49e-07
LPXN	leupaxin	-2.71	6.22e-08
CXCL1	C-X-C motif chemokine ligand 1	-2.71	7.08e-05
PTTG1	pituitary tumor-transforming 1	-2.26	5.56e-08
CDH6	cadherin 6	-2.23	2.73e-07
HIST1H4C	histone cluster 1, H4c	-2.22	1e-05
CD24	CD24 molecule	-2.17	3.52e-07
PTTG3P	pituitary tumor-transforming 3, pseudogene	-2.11	1.55e-05
APCDD1L	APC down-regulated 1 like	-2.1	1.32e-05
CD55	CD55 molecule (Cromer blood group)	-2.09	1.11e-05
KIAA0101	KIAA0101	-2.01	1.12e-06
CDC20	cell division cycle 20	-2.01	1.05e-05
FST	follistatin	-1.99	2.75e-06
MCM7	minichromosome maintenance complex component 7	-1.99	4.45e-06
UBE2C	ubiquitin conjugating enzyme E2 C	-1.97	2.33e-07
TM4SF1	transmembrane 4 L six family member 1	-1.97	4.66e-07
DDX10	DEAD-box helicase 10	-1.97	1.62e-06
GINS2	GINS complex subunit 2	-1.93	1.76e-06
CCNA2	cyclin A2	-1.92	6.58e-07
PAPPA	pappalysin 1	-1.9	1.06e-06
TUBB3	tubulin beta 3 class III	-1.89	2.64e-05
NUSAP1	nucleolar and spindle associated protein 1	-1.86	8.65e-06
ODC1	ornithine decarboxylase 1	-1.84	8.71e-07
CCNB2	cyclin B2	-1.83	3.89e-07
BDKRB1	bradykinin receptor B1	-1.83	2.42e-06
PRC1	protein regulator of cytokinesis 1	-1.81	1.46e-06
PHLDA1	pleckstrin homology like domain family A member 1	-1.79	1.76e-06
PRSS3	protease, serine 3	-1.77	3.81e-06
CXCL6	C-X-C motif chemokine ligand 6	-1.77	8.86e-05
TOP2A	topoisomerase (DNA) II alpha	-1.76	5.13e-05
KIF20A	kinesin family member 20A	-1.75	2.49e-06
UHRF1	ubiquitin like with PHD and ring finger domains 1	-1.73	1.3e-06
NCAPG	non-SMC condensin I complex subunit G	-1.73	3.27e-05
CEP55	centrosomal protein 55	-1.72	1.65e-06
NTM	neurotrimin	-1.71	1.05e-06
CKAP2L	cytoskeleton associated protein 2 like	-1.71	7.45e-06
PODXL	podocalyxin like	-1.7	5.56e-08
PBK	PDZ binding kinase	-1.7	3.05e-06
SLC7A1	solute carrier family 7 member 1	-1.68	1.57e-05
CYP1B1	cytochrome P450 family 1 subfamily B member 1	-1.68	0.000402
CDKN3	cyclin dependent kinase inhibitor 3	-1.67	7.76e-05
CENPM	centromere protein M	-1.65	2.99e-05
PDE7B	phosphodiesterase 7B	-1.64	0.000112
MAD2L1	MAD2 mitotic arrest deficient-like 1 (yeast)	-1.64	0.000973
DNAJC9	DnaJ heat shock protein family (Hsp40) member C9	-1.63	1.46e-05
BMP2	bone morphogenetic protein 2	-1.61	3.76e-05
TFPI2	tissue factor pathway inhibitor 2	-1.61	0.00226
FEN1	flap structure-specific endonuclease 1	-1.6	2.48e-07
ANLN	anillin actin binding protein	-1.6	8.65e-06
KIF11	kinesin family member 11	-1.6	0.000105
ADGRG1	adhesion G protein-coupled receptor G1	-1.59	2.95e-07
GALNT12	polypeptide N-acetylgalactosaminyltransferase 12	-1.59	6.8e-07
AURKA	aurora kinase A	-1.59	1.21e-05
NPTX1	neuronal pentraxin 1	-1.59	0.0049
HMGN2	high mobility group nucleosomal binding domain 2	-1.58	1.84e-05
CENPF	centromere protein F	-1.57	1.36e-06
COL13A1	collagen type XIII alpha 1 chain	-1.56	3.72e-06
CDC45	cell division cycle 45	-1.56	1.21e-05
HJURP	Holliday junction recognition protein	-1.55	1.77e-07
TRIP13	thyroid hormone receptor interactor 13	-1.55	2.75e-06
E2F7	E2F transcription factor 7	-1.54	1.14e-06
CENPW	centromere protein W	-1.53	0.000456
TYMS	thymidylate synthetase	-1.52	0.000952
COL22A1	collagen type XXII alpha 1 chain	-1.5	8.2e-06
HMGB2	high mobility group box 2	-1.5	0.000318
FBXO5	F-box protein 5	-1.49	3.12e-05
NRIP3	nuclear receptor interacting protein 3	-1.48	1.02e-06
TK1	thymidine kinase 1	-1.48	6.24e-05
RRM1	ribonucleotide reductase catalytic subunit M1	-1.47	2.65e-06
RAB27B	RAB27B, member RAS oncogene family	-1.47	5.85e-06
BIRC5	baculoviral IAP repeat containing 5	-1.47	1e-05
UBE2T	ubiquitin conjugating enzyme E2 T	-1.47	2.23e-05
IL33	interleukin 33	-1.46	0.000323
STMN1	stathmin 1	-1.45	2.21e-06
NCEH1	neutral cholesterol ester hydrolase 1	-1.45	3.75e-06
CYP2S1	cytochrome P450 family 2 subfamily S member 1	-1.45	1.57e-05
PRRX2	paired related homeobox 2	-1.45	2.85e-05
IL13RA2	interleukin 13 receptor subunit alpha 2	-1.44	1.9e-07
SPC24	SPC24, NDC80 kinetochore complex component	-1.44	1.42e-06
CDCA5	cell division cycle associated 5	-1.43	2.93e-06
FAM129A	family with sequence similarity 129 member A	-1.43	1.17e-05
CDK1	cyclin dependent kinase 1	-1.43	4.03e-05
FAM64A	family with sequence similarity 64 member A	-1.42	8.69e-07
NEK2	NIMA related kinase 2	-1.42	0.00109
CKS1B	CDC28 protein kinase regulatory subunit 1B	-1.4	6.58e-07
RACGAP1	Rac GTPase activating protein 1	-1.4	1.12e-06
KIF23	kinesin family member 23	-1.4	1.11e-05
BUB1	BUB1 mitotic checkpoint serine/threonine kinase	-1.38	1.18e-05
ID2	inhibitor of DNA binding 2, HLH protein	-1.38	3.11e-05
CDCA3	cell division cycle associated 3	-1.38	3.37e-05
EXOSC9	exosome component 9	-1.37	1.55e-06
GK	glycerol kinase	-1.37	3.42e-05
HS3ST3A1	heparan sulfate-glucosamine 3-sulfotransferase 3A1	-1.36	2.34e-06
DCBLD2	discoidin, CUB and LCCL domain containing 2	-1.36	3.56e-06
ASPM	abnormal spindle microtubule assembly	-1.36	4.48e-06
LY96	lymphocyte antigen 96	-1.36	0.000343
GABBR2	gamma-aminobutyric acid type B receptor subunit 2	-1.35	7.4e-07
HEY2	hes related family bHLH transcription factor with YRPW motif 2	-1.35	8.42e-07
AURKB	aurora kinase B	-1.35	4.77e-06
HMGA1	high mobility group AT-hook 1	-1.34	2.73e-07
TRMT5	tRNA methyltransferase 5	-1.34	2.98e-06
TGFBI	transforming growth factor beta induced	-1.33	6.58e-07
RAD51AP1	RAD51 associated protein 1	-1.33	7.72e-06
MCM3	minichromosome maintenance complex component 3	-1.33	1.43e-05
MCM10	minichromosome maintenance 10 replication initiation factor	-1.32	4.39e-06
CTSL	cathepsin L	-1.32	2.44e-05
CIRBP	cold inducible RNA binding protein	-1.32	5.12e-05
SLC14A1	solute carrier family 14 member 1 (Kidd blood group)	-1.31	4.88e-07
CD44	CD44 molecule (Indian blood group)	-1.31	0.000433
NUDT1	nudix hydrolase 1	-1.3	1.84e-05
PPP1R15A	protein phosphatase 1 regulatory subunit 15A	-1.3	3.29e-05
CENPN	centromere protein N	-1.29	8.27e-07
PFKP	phosphofructokinase, platelet	-1.29	6.47e-06
NT5E	5'-nucleotidase ecto	-1.28	0.00537
AKR1C2	aldo-keto reductase family 1, member C2	-1.26	5.14e-06
MCM5	minichromosome maintenance complex component 5	-1.26	1.51e-05
MMP10	matrix metallopeptidase 10	-1.26	0.000107
SNAR-A1	small ILF3/NF90-associated RNA A1	-1.26	0.000133
PCNA	proliferating cell nuclear antigen	-1.26	0.00975
DLGAP5	DLG associated protein 5	-1.25	2.23e-05
MELK	maternal embryonic leucine zipper kinase	-1.25	3.09e-05
SH3KBP1	SH3 domain containing kinase binding protein 1	-1.24	5.9e-06
H2AFZ	H2A histone family member Z	-1.24	0.00012
DACT1	dishevelled binding antagonist of beta catenin 1	-1.23	1.57e-05
CDCA4	cell division cycle associated 4	-1.23	2e-05
LMO2	LIM domain only 2	-1.23	2.59e-05
WLS	wntless Wnt ligand secretion mediator	-1.23	3.42e-05
STC1	stanniocalcin 1	-1.23	0.000537
CDCA8	cell division cycle associated 8	-1.22	1.2e-05
PLEK2	pleckstrin 2	-1.22	1.27e-05
IER3	immediate early response 3	-1.22	0.0013
ZWINT	ZW10 interacting kinetochore protein	-1.21	8.89e-06
PLK4	polo like kinase 4	-1.2	6.58e-07
HMMR	hyaluronan mediated motility receptor	-1.2	2.75e-06
RPL39L	ribosomal protein L39 like	-1.19	3e-06
GRB14	growth factor receptor bound protein 14	-1.19	0.000144
CCND1	cyclin D1	-1.18	8.89e-06
POC1A	POC1 centriolar protein A	-1.18	0.000124
LMNB2	lamin B2	-1.17	1.37e-05
TPX2	TPX2, microtubule nucleation factor	-1.17	3.68e-05
KIF2C	kinesin family member 2C	-1.17	0.000118
MCM2	minichromosome maintenance complex component 2	-1.16	4.4e-05
DEPDC1	DEP domain containing 1	-1.16	9.23e-05
BTG3	BTG anti-proliferation factor 3	-1.16	0.000194
SPC25	SPC25, NDC80 kinetochore complex component	-1.15	4.51e-06
CREB3L2	cAMP responsive element binding protein 3 like 2	-1.15	9.75e-05
TTK	TTK protein kinase	-1.15	0.000201
CDCP1	CUB domain containing protein 1	-1.14	2.95e-07
RND3	Rho family GTPase 3	-1.14	8.33e-06
CSTF3	cleavage stimulation factor subunit 3	-1.13	1.38e-06
STIL	SCL/TAL1 interrupting locus	-1.13	0.000272
FOSL1	FOS like 1, AP-1 transcription factor subunit	-1.12	2.08e-06
SEMA3A	semaphorin 3A	-1.12	1.32e-05
RPA3	replication protein A3	-1.12	1.71e-05
SMS	spermine synthase	-1.12	0.000134
NDUFA4L2	NDUFA4, mitochondrial complex associated like 2	-1.11	0.000143
FOXM1	forkhead box M1	-1.1	4.54e-07
RFC4	replication factor C subunit 4	-1.1	6.42e-07
COX17	COX17, cytochrome c oxidase copper chaperone	-1.1	8.12e-06
SKA1	spindle and kinetochore associated complex subunit 1	-1.1	2e-05
NKD2	naked cuticle homolog 2	-1.1	4.22e-05
CACYBP	calcyclin binding protein	-1.1	9.34e-05
PPP1R3C	protein phosphatase 1 regulatory subunit 3C	-1.1	0.000185
LRIG1	leucine rich repeats and immunoglobulin like domains 1	-1.1	0.000246
SLC7A5	solute carrier family 7 member 5	-1.1	0.000677
ECT2	epithelial cell transforming 2	-1.1	0.00559
OIP5	Opa interacting protein 5	-1.09	1.46e-06
KPNA2	karyopherin subunit alpha 2	-1.09	9.95e-06
CCNF	cyclin F	-1.08	1.51e-05
FOXD1	forkhead box D1	-1.08	3.06e-05
PAQR4	progestin and adipoQ receptor family member 4	-1.08	0.00147
CCNB1	cyclin B1	-1.08	0.00179
CHSY1	chondroitin sulfate synthase 1	-1.07	9.72e-06
CENPK	centromere protein K	-1.07	0.000104
BDNF	brain derived neurotrophic factor	-1.07	0.000178
PRDM8	PR/SET domain 8	-1.07	0.000392
MCM6	minichromosome maintenance complex component 6	-1.07	0.0004
SLC7A11	solute carrier family 7 member 11	-1.06	2.99e-05
FZD8	frizzled class receptor 8	-1.06	4.97e-05
IGFBP5	insulin like growth factor binding protein 5	-1.06	0.0003
TACC3	transforming acidic coiled-coil containing protein 3	-1.05	5.4e-06
SLC3A2	solute carrier family 3 member 2	-1.05	8.18e-05
ITGA2	integrin subunit alpha 2	-1.04	2.58e-05
KIF20B	kinesin family member 20B	-1.03	0.00101
LXN	latexin	-1.03	0.00245
ENO2	enolase 2	-1.02	3.03e-05
CKAP2	cytoskeleton associated protein 2	-1.02	6.03e-05
SPHK1	sphingosine kinase 1	-1.02	0.000232
CDCA7	cell division cycle associated 7	-1.01	2.98e-06
RCAN1	regulator of calcineurin 1	-1.01	1.57e-05
MMP16	matrix metallopeptidase 16	-1.01	9.09e-05
RNASEH2A	ribonuclease H2 subunit A	-1.01	0.000124
NDC80	NDC80, kinetochore complex component	-1.01	0.000649
LIMS2	LIM zinc finger domain containing 2	1.01	5.74e-05
SGCG	sarcoglycan gamma	1.01	9.65e-05
CNN2	calponin 2	1.01	0.000122
CLDN11	claudin 11	1.01	0.00302
GCHFR	GTP cyclohydrolase I feedback regulator	1.02	5.14e-06
BCL2L1	BCL2 like 1	1.02	2.25e-05
PLSCR4	phospholipid scramblase 4	1.02	0.000488
HEBP1	heme binding protein 1	1.02	0.000671
SCNN1A	sodium channel epithelial 1 alpha subunit	1.03	5.19e-07
SLC2A5	solute carrier family 2 member 5	1.03	6.58e-07
SORT1	sortilin 1	1.03	2.75e-06
FZD4	frizzled class receptor 4	1.03	3.5e-06
TST	thiosulfate sulfurtransferase	1.03	0.000396
AKR1C3	aldo-keto reductase family 1, member C3	1.04	3.36e-06
CFH	complement factor H	1.04	8.83e-06
CTSK	cathepsin K	1.04	2.23e-05
SLC2A10	solute carrier family 2 member 10	1.04	0.000266
TMEM43	transmembrane protein 43	1.05	9.98e-06
ELL2	elongation factor for RNA polymerase II 2	1.05	5.76e-05
EBPL	emopamil binding protein like	1.05	9.39e-05
CYBRD1	cytochrome b reductase 1	1.05	0.000261
GSTT1	glutathione S-transferase theta 1	1.05	0.000272
ACVR2A	activin A receptor type 2A	1.05	0.00305
MTSS1	metastasis suppressor 1	1.06	7.76e-06
PRSS23	protease, serine 23	1.06	0.000624
MGARP	mitochondria localized glutamic acid rich protein	1.07	2e-05
HSPB6	heat shock protein family B (small) member 6	1.08	0.000271
HSPB2	heat shock protein family B (small) member 2	1.09	6.62e-06
TPP1	tripeptidyl peptidase 1	1.09	0.00154
PLIN2	perilipin 2	1.1	8.64e-06
BEX1	brain expressed X-linked 1	1.1	1.21e-05
GSN	gelsolin	1.1	0.000233
PPIC	peptidylprolyl isomerase C	1.1	0.000239
ABCA6	ATP binding cassette subfamily A member 6	1.11	2.7e-06
MGST1	microsomal glutathione S-transferase 1	1.11	3.71e-05
GPNMB	glycoprotein nmb	1.11	0.000298
QPRT	quinolinate phosphoribosyltransferase	1.12	2.84e-06
CEBPB	CCAAT/enhancer binding protein beta	1.12	2.05e-05
IFITM3	interferon induced transmembrane protein 3	1.12	0.000779
ZBTB16	zinc finger and BTB domain containing 16	1.13	6.58e-07
DKK3	dickkopf WNT signaling pathway inhibitor 3	1.13	3.17e-05
ARHGDIB	Rho GDP dissociation inhibitor beta	1.13	9.77e-05
PKD2	polycystin 2, transient receptor potential cation channel	1.13	0.000389
OSR1	odd-skipped related transciption factor 1	1.13	0.000557
STAT2	signal transducer and activator of transcription 2	1.14	1.47e-06
ROR1	receptor tyrosine kinase like orphan receptor 1	1.14	3.08e-06
HCFC1R1	host cell factor C1 regulator 1	1.14	0.000244
PPP1CB	protein phosphatase 1 catalytic subunit beta	1.15	1.51e-05
TEX2	testis expressed 2	1.15	5.03e-05
FSTL3	follistatin like 3	1.15	8.67e-05
NPTX2	neuronal pentraxin 2	1.16	2.53e-06
SHISA3	shisa family member 3	1.17	1.69e-06
VGLL3	vestigial like family member 3	1.17	3.71e-06
ITGA10	integrin subunit alpha 10	1.17	8.96e-06
ITGAV	integrin subunit alpha V	1.17	6.45e-05
SERPINE1	serpin family E member 1	1.17	7.99e-05
STARD5	StAR related lipid transfer domain containing 5	1.17	0.000105
CTGF	connective tissue growth factor	1.18	4.58e-05
GLRX	glutaredoxin	1.18	9.35e-05
KDELR3	KDEL endoplasmic reticulum protein retention receptor 3	1.18	0.000208
PTGDS	prostaglandin D2 synthase	1.19	8.47e-07
ZNF106	zinc finger protein 106	1.19	7.97e-06
GSTM1	glutathione S-transferase mu 1	1.19	8.67e-06
IRAK3	interleukin 1 receptor associated kinase 3	1.19	1.11e-05
MMP23B	matrix metallopeptidase 23B	1.19	0.000404
SH3BGRL	SH3 domain binding glutamate rich protein like	1.19	0.000644
SEPTIN11	septin 11	1.19	0.00421
SLC6A4	solute carrier family 6 member 4	1.2	6.22e-07
DEPTOR	DEP domain containing MTOR-interacting protein	1.21	1.94e-06
ARHGEF3	Rho guanine nucleotide exchange factor 3	1.22	1.24e-05
DDAH1	dimethylarginine dimethylaminohydrolase 1	1.22	0.000725
PRUNE2	prune homolog 2	1.23	1.4e-05
DAPK1	death associated protein kinase 1	1.23	1.62e-05
SNAI2	snail family transcriptional repressor 2	1.23	0.00014
ECM2	extracellular matrix protein 2	1.24	4.17e-05
SULF1	sulfatase 1	1.25	2.02e-05
HSD11B1	hydroxysteroid 11-beta dehydrogenase 1	1.26	3.75e-06
THBS1	thrombospondin 1	1.26	0.00243
RARRES1	retinoic acid receptor responder 1	1.27	6.95e-06
H19	H19, imprinted maternally expressed transcript (non-protein coding)	1.27	2.09e-05
HACD1	3-hydroxyacyl-CoA dehydratase 1	1.27	0.000116
NUPR1	nuclear protein 1, transcriptional regulator	1.28	2.77e-06
FNDC1	fibronectin type III domain containing 1	1.28	6e-06
CLIP3	CAP-Gly domain containing linker protein 3	1.28	0.000239
ASS1	argininosuccinate synthase 1	1.29	6.22e-07
GSTM2	glutathione S-transferase mu 2 (muscle)	1.29	2.51e-06
PTX3	pentraxin 3	1.29	0.00698
MEX3B	mex-3 RNA binding family member B	1.3	0.00259
DCN	decorin	1.31	8.65e-06
AOX1	aldehyde oxidase 1	1.31	1.27e-05
ABCA8	ATP binding cassette subfamily A member 8	1.32	1.71e-06
SHROOM3	shroom family member 3	1.32	1.11e-05
TAGLN	transgelin	1.32	3.44e-05
KRT7	keratin 7	1.33	4.28e-06
FBLN1	fibulin 1	1.34	1.05e-05
METTL7A	methyltransferase like 7A	1.34	0.00311
EDN1	endothelin 1	1.35	3.48e-06
MT1M	metallothionein 1M	1.35	0.00013
SLC40A1	solute carrier family 40 member 1	1.36	1.46e-06
RAMP1	receptor activity modifying protein 1	1.36	2.07e-05
PTN	pleiotrophin	1.36	3.44e-05
IFI44L	interferon induced protein 44 like	1.37	7.49e-07
CDC42EP5	CDC42 effector protein 5	1.37	2.75e-06
ALCAM	activated leukocyte cell adhesion molecule	1.37	0.00197
CLIC3	chloride intracellular channel 3	1.38	3.32e-05
GCNT1	glucosaminyl (N-acetyl) transferase 1, core 2	1.39	5.18e-07
FAM107A	family with sequence similarity 107 member A	1.4	3.56e-06
C1QTNF5	C1q and tumor necrosis factor related protein 5	1.42	1.69e-06
OPTN	optineurin	1.44	2.57e-06
NEO1	neogenin 1	1.44	8.02e-06
EPHB6	EPH receptor B6	1.44	5.41e-05
SRPX2	sushi repeat containing protein, X-linked 2	1.44	0.000109
MID1	midline 1	1.45	4.7e-05
RASL11B	RAS like family 11 member B	1.46	1.11e-06
TCEAL3	transcription elongation factor A like 3	1.46	1.16e-05
ABCC3	ATP binding cassette subfamily C member 3	1.47	2.9e-06
ALPK2	alpha kinase 2	1.47	3.35e-06
PLCXD3	phosphatidylinositol specific phospholipase C X domain containing 3	1.49	6.42e-07
SLC27A3	solute carrier family 27 member 3	1.49	1.11e-06
NR2F1	nuclear receptor subfamily 2 group F member 1	1.49	7.01e-06
MXD4	MAX dimerization protein 4	1.49	2.23e-05
CBS	cystathionine-beta-synthase	1.5	1.48e-06
GLS	glutaminase	1.52	4.54e-07
NSG1	neuron specific gene family member 1	1.52	1.4e-06
SPRY1	sprouty RTK signaling antagonist 1	1.52	1.68e-06
COX7A1	cytochrome c oxidase subunit 7A1	1.53	1.09e-05
LAMA2	laminin subunit alpha 2	1.53	1.27e-05
CRISPLD2	cysteine rich secretory protein LCCL domain containing 2	1.54	1.17e-05
RARRES3	retinoic acid receptor responder 3	1.55	2.73e-07
SEC14L1	SEC14 like lipid binding 1	1.56	2.9e-06
CROT	carnitine O-octanoyltransferase	1.56	2.99e-05
IRS2	insulin receptor substrate 2	1.57	1e-06
FHL1	four and a half LIM domains 1	1.57	1.22e-06
ADRA1B	adrenoceptor alpha 1B	1.57	5.31e-06
LMO3	LIM domain only 3	1.58	6.22e-07
COL4A1	collagen type IV alpha 1 chain	1.58	2.53e-05
PALLD	palladin, cytoskeletal associated protein	1.59	1.76e-07
OLFML3	olfactomedin like 3	1.6	1.14e-06
LOXL4	lysyl oxidase like 4	1.61	1.12e-06
HPS5	HPS5, biogenesis of lysosomal organelles complex 2 subunit 2	1.63	9.41e-07
GAS6	growth arrest specific 6	1.65	9.71e-07
TXNIP	thioredoxin interacting protein	1.66	6.58e-07
PDE1A	phosphodiesterase 1A	1.66	6.66e-07
MT1X	metallothionein 1X	1.68	4.26e-05
OXTR	oxytocin receptor	1.69	9.15e-08
TCEAL4	transcription elongation factor A like 4	1.69	2.37e-07
WISP1	WNT1 inducible signaling pathway protein 1	1.69	3.19e-07
MYL9	myosin light chain 9	1.71	6.11e-06
FOXO1	forkhead box O1	1.71	8.81e-06
ERRFI1	ERBB receptor feedback inhibitor 1	1.75	3.91e-06
ADH1A	alcohol dehydrogenase 1A (class I), alpha polypeptide	1.76	4.88e-07
PPP1R14A	protein phosphatase 1 regulatory inhibitor subunit 14A	1.77	5.19e-07
LUM	lumican	1.78	1.41e-05
CITED2	Cbp/p300 interacting transactivator with Glu/Asp rich carboxy-terminal domain 2	1.78	0.000277
FBLN5	fibulin 5	1.79	3.41e-07
RPS6KA2	ribosomal protein S6 kinase A2	1.8	4.74e-07
GAS1	growth arrest specific 1	1.8	1.12e-06
ADARB1	adenosine deaminase, RNA specific B1	1.81	4.54e-07
S100A4	S100 calcium binding protein A4	1.81	6.22e-07
EPAS1	endothelial PAS domain protein 1	1.83	1.27e-07
C1orf198	chromosome 1 open reading frame 198	1.84	4.44e-06
HIST1H2BK	histone cluster 1, H2bk	1.9	2.01e-07
PGM1	phosphoglucomutase 1	1.96	6.58e-07
RPS29	ribosomal protein S29	1.97	3.3e-07
ANGPTL4	angiopoietin like 4	1.98	2.67e-05
DUSP23	dual specificity phosphatase 23	2.02	5.19e-07
CTHRC1	collagen triple helix repeat containing 1	2.03	1.11e-05
PDGFRB	platelet derived growth factor receptor beta	2.08	2.47e-06
PROS1	protein S (alpha)	2.11	2.75e-06
RAB11FIP1	RAB11 family interacting protein 1	2.16	3.49e-07
DDIT4	DNA damage inducible transcript 4	2.17	1.06e-06
ANKRD1	ankyrin repeat domain 1	2.17	0.00041
C10orf10	chromosome 10 open reading frame 10	2.2	8.27e-07
ACTA2	actin, alpha 2, smooth muscle, aorta	2.24	1.18e-06
ADM	adrenomedullin	2.26	6.11e-07
SUSD2	sushi domain containing 2	2.29	4.97e-07
CD14	CD14 molecule	2.3	6.58e-07
FBXO32	F-box protein 32	2.32	1.12e-06
SVEP1	sushi, von Willebrand factor type A, EGF and pentraxin domain containing 1	2.36	1.22e-06
TMEM119	transmembrane protein 119	2.39	2.37e-07
COL8A1	collagen type VIII alpha 1 chain	2.49	9.15e-08
APOD	apolipoprotein D	2.54	5.43e-08
MAOA	monoamine oxidase A	2.64	2.73e-07
PDGFD	platelet derived growth factor D	2.68	6.22e-08
LMCD1	LIM and cysteine rich domains 1	2.68	8.09e-08
TSC22D3	TSC22 domain family member 3	2.73	1.67e-06
CD34	CD34 molecule	2.8	3.72e-08
CRYAB	crystallin alpha B	2.84	4.25e-07
INMT	indolethylamine N-methyltransferase	3.01	9.58e-08
FKBP5	FK506 binding protein 5	3.14	5.56e-08
MGP	matrix Gla protein	3.49	1.02e-08
RGCC	regulator of cell cycle	3.72	2.13e-08

## Sheet: 8VS0-adj.P.value<0.05-|logFC|>1
List of DEGs in CVSMCs cultured for 8 days in calcified medium
Gene.symbol	Gene name	logFC	adj.P.Val
SOST	sclerostin	-4.47	1.21e-08
DIRAS3	DIRAS family GTPase 3	-4.4	9.35e-08
CXCL8	C-X-C motif chemokine ligand 8	-4.35	1.32e-06
ANXA10	annexin A10	-4.13	1.38e-07
MMP1	matrix metallopeptidase 1	-3.91	3.67e-05
IL1B	interleukin 1 beta	-3.83	1.24e-06
ALDH1A3	aldehyde dehydrogenase 1 family member A3	-3.46	1.11e-07
CDC20	cell division cycle 20	-3.45	2.98e-07
PLAU	plasminogen activator, urokinase	-3.35	5.03e-08
UBE2C	ubiquitin conjugating enzyme E2 C	-3.26	1.37e-08
MCM7	minichromosome maintenance complex component 7	-3.03	3.98e-07
CDH6	cadherin 6	-2.96	5.03e-08
UHRF1	ubiquitin like with PHD and ring finger domains 1	-2.93	6.3e-08
PRC1	protein regulator of cytokinesis 1	-2.9	5.47e-08
TUBB3	tubulin beta 3 class III	-2.89	6.53e-07
TGFBI	transforming growth factor beta induced	-2.88	4.71e-07
PTTG1	pituitary tumor-transforming 1	-2.85	2.21e-08
TOP2A	topoisomerase (DNA) II alpha	-2.77	2.09e-06
ID1	inhibitor of DNA binding 1, HLH protein	-2.71	2.22e-07
TYMS	thymidylate synthetase	-2.69	2.47e-05
CCL2	C-C motif chemokine ligand 2	-2.68	2.78e-06
PTTG3P	pituitary tumor-transforming 3, pseudogene	-2.68	3.59e-06
HIST1H4C	histone cluster 1, H4c	-2.61	2.76e-05
CCNA2	cyclin A2	-2.59	1.38e-07
GINS2	GINS complex subunit 2	-2.58	1.97e-07
CCNB2	cyclin B2	-2.56	1.56e-08
PHLDA1	pleckstrin homology like domain family A member 1	-2.51	5.16e-07
KIF20A	kinesin family member 20A	-2.48	1.38e-07
LPXN	leupaxin	-2.48	7.17e-07
CEP55	centrosomal protein 55	-2.43	2.56e-07
CXCL1	C-X-C motif chemokine ligand 1	-2.43	0.000241
KIAA0101	KIAA0101	-2.41	8.12e-07
FEN1	flap structure-specific endonuclease 1	-2.38	9.1e-08
CDC45	cell division cycle 45	-2.36	3.98e-07
TRIP13	thyroid hormone receptor interactor 13	-2.35	1.38e-07
CDCA5	cell division cycle associated 5	-2.32	2.5e-07
PRRX2	paired related homeobox 2	-2.32	6.1e-07
NUSAP1	nucleolar and spindle associated protein 1	-2.31	1.25e-06
ODC1	ornithine decarboxylase 1	-2.28	1.38e-07
COLEC12	collectin subfamily member 12	-2.28	4.24e-07
AURKA	aurora kinase A	-2.27	2.5e-07
LYPD1	LY6/PLAUR domain containing 1	-2.24	6.66e-05
PBK	PDZ binding kinase	-2.22	4.82e-07
TK1	thymidine kinase 1	-2.21	3.44e-06
NCAPG	non-SMC condensin I complex subunit G	-2.21	6.88e-06
PODXL	podocalyxin like	-2.2	1.41e-07
BIRC5	baculoviral IAP repeat containing 5	-2.18	1.06e-06
TUBA1C	tubulin alpha 1c	-2.17	1.68e-06
APCDD1L	APC down-regulated 1 like	-2.16	3.72e-06
DHRS3	dehydrogenase/reductase 3	-2.15	1.1e-05
LXN	latexin	-2.15	1.71e-05
BMP2	bone morphogenetic protein 2	-2.14	6.17e-06
MAD2L1	MAD2 mitotic arrest deficient-like 1 (yeast)	-2.14	0.000163
CKAP2L	cytoskeleton associated protein 2 like	-2.13	1.46e-06
SLC7A1	solute carrier family 7 member 1	-2.13	3.07e-06
PRSS3	protease, serine 3	-2.11	9.48e-07
KIF11	kinesin family member 11	-2.11	1.33e-05
NDUFA4L2	NDUFA4, mitochondrial complex associated like 2	-2.09	1.22e-06
IGFBP5	insulin like growth factor binding protein 5	-2.09	1.74e-06
DDX10	DEAD-box helicase 10	-2.08	1.97e-07
COL13A1	collagen type XIII alpha 1 chain	-2.08	3.98e-07
CDK1	cyclin dependent kinase 1	-2.08	2.72e-06
ANLN	anillin actin binding protein	-2.07	1.58e-06
MALL	mal, T-cell differentiation protein like	-2.07	2.49e-05
CENPM	centromere protein M	-2.05	3.2e-06
DNAJC9	DnaJ heat shock protein family (Hsp40) member C9	-2.04	2.25e-06
TUBB4B	tubulin beta 4B class IVb	-2	3.2e-06
CXCL6	C-X-C motif chemokine ligand 6	-2	0.000222
PRDM8	PR/SET domain 8	-1.99	2.92e-05
MCM3	minichromosome maintenance complex component 3	-1.97	9.42e-07
FAM64A	family with sequence similarity 64 member A	-1.96	1.11e-07
TRMT5	tRNA methyltransferase 5	-1.96	3.81e-07
ASPM	abnormal spindle microtubule assembly	-1.96	6.26e-07
CDCA3	cell division cycle associated 3	-1.96	3.26e-06
CENPF	centromere protein F	-1.95	3.62e-07
CRIP1	cysteine rich protein 1	-1.95	2.29e-06
GABBR2	gamma-aminobutyric acid type B receptor subunit 2	-1.94	1.86e-07
DLGAP5	DLG associated protein 5	-1.94	9.39e-07
FBXO5	F-box protein 5	-1.92	3.02e-06
HJURP	Holliday junction recognition protein	-1.91	1.16e-07
TUBA1A	tubulin alpha 1a	-1.9	1.92e-06
TM4SF1	transmembrane 4 L six family member 1	-1.9	2.02e-05
HMGN2	high mobility group nucleosomal binding domain 2	-1.89	2.71e-05
RRM1	ribonucleotide reductase catalytic subunit M1	-1.87	4.64e-07
AURKB	aurora kinase B	-1.87	1.25e-06
SRSF2	serine and arginine rich splicing factor 2	-1.87	9.96e-06
BDKRB1	bradykinin receptor B1	-1.86	1.94e-06
NEK2	NIMA related kinase 2	-1.86	0.000125
CIRBP	cold inducible RNA binding protein	-1.82	1.12e-05
PFKP	phosphofructokinase, platelet	-1.81	1.33e-06
LMNB2	lamin B2	-1.79	1.92e-06
LMO2	LIM domain only 2	-1.78	5.51e-07
HMGA1	high mobility group AT-hook 1	-1.78	3.26e-06
CDKN3	cyclin dependent kinase inhibitor 3	-1.78	3.43e-05
HMGB2	high mobility group box 2	-1.78	7.81e-05
GALNT12	polypeptide N-acetylgalactosaminyltransferase 12	-1.76	7.61e-08
TUBA1B	tubulin alpha 1b	-1.76	5.51e-07
SPC24	SPC24, NDC80 kinetochore complex component	-1.73	5.47e-08
RACGAP1	Rac GTPase activating protein 1	-1.72	5.85e-07
KIF23	kinesin family member 23	-1.72	2.29e-06
COL22A1	collagen type XXII alpha 1 chain	-1.71	3.02e-06
PTGS2	prostaglandin-endoperoxide synthase 2	-1.71	1.49e-05
DNMT1	DNA (cytosine-5-)-methyltransferase 1	-1.71	2.29e-05
CD55	CD55 molecule (Cromer blood group)	-1.69	2.29e-05
BUB1	BUB1 mitotic checkpoint serine/threonine kinase	-1.68	4.12e-06
MCM10	minichromosome maintenance 10 replication initiation factor	-1.67	7.95e-07
EXOSC9	exosome component 9	-1.66	1.06e-06
ADGRG1	adhesion G protein-coupled receptor G1	-1.65	5.99e-07
STMN1	stathmin 1	-1.65	1.06e-06
CCNF	cyclin F	-1.65	1.78e-06
PLEK2	pleckstrin 2	-1.65	3.45e-06
UBE2T	ubiquitin conjugating enzyme E2 T	-1.65	8.84e-06
CKS1B	CDC28 protein kinase regulatory subunit 1B	-1.64	1.06e-06
RAD51AP1	RAD51 associated protein 1	-1.64	1.68e-06
HNRNPD	heterogeneous nuclear ribonucleoprotein D	-1.64	1.44e-05
TOMM40	translocase of outer mitochondrial membrane 40	-1.64	2.6e-05
EGR1	early growth response 1	-1.64	0.000761
NPTX1	neuronal pentraxin 1	-1.63	0.0036
NCEH1	neutral cholesterol ester hydrolase 1	-1.62	1.89e-06
KIF20B	kinesin family member 20B	-1.62	2.52e-05
CDCP1	CUB domain containing protein 1	-1.61	5.03e-08
CDCA8	cell division cycle associated 8	-1.61	1.46e-06
MCM5	minichromosome maintenance complex component 5	-1.6	1.94e-06
KIF2C	kinesin family member 2C	-1.6	1.29e-05
PDE7B	phosphodiesterase 7B	-1.6	9.59e-05
PAPPA	pappalysin 1	-1.59	2.18e-07
E2F7	E2F transcription factor 7	-1.58	7.1e-07
POC1A	POC1 centriolar protein A	-1.57	2.23e-05
ID3	inhibitor of DNA binding 3, HLH protein	-1.57	3.43e-05
CYP2S1	cytochrome P450 family 2 subfamily S member 1	-1.56	7.17e-06
TFPI2	tissue factor pathway inhibitor 2	-1.56	0.000284
HS3ST3A1	heparan sulfate-glucosamine 3-sulfotransferase 3A1	-1.55	4.83e-07
ZWINT	ZW10 interacting kinetochore protein	-1.55	1.58e-06
CHSY1	chondroitin sulfate synthase 1	-1.55	2.43e-06
CDCA4	cell division cycle associated 4	-1.55	2.69e-06
TPX2	TPX2, microtubule nucleation factor	-1.55	2.73e-06
KPNA2	karyopherin subunit alpha 2	-1.55	4.12e-06
PLK4	polo like kinase 4	-1.54	1.51e-07
CRABP2	cellular retinoic acid binding protein 2	-1.54	1.04e-05
TTK	TTK protein kinase	-1.54	2.38e-05
STIL	SCL/TAL1 interrupting locus	-1.54	4.81e-05
MCM2	minichromosome maintenance complex component 2	-1.53	4.77e-06
PCNA	proliferating cell nuclear antigen	-1.53	0.00282
FOXM1	forkhead box M1	-1.52	1.08e-06
FOXD1	forkhead box D1	-1.52	1.09e-06
DCBLD2	discoidin, CUB and LCCL domain containing 2	-1.52	1.01e-05
NTM	neurotrimin	-1.51	2.19e-06
CREB3L2	cAMP responsive element binding protein 3 like 2	-1.51	0.000346
TACC3	transforming acidic coiled-coil containing protein 3	-1.5	2.06e-07
TUBB	tubulin beta class I	-1.5	2.5e-06
NRIP3	nuclear receptor interacting protein 3	-1.5	3.57e-06
CYP1B1	cytochrome P450 family 1 subfamily B member 1	-1.5	0.000867
IGFBP6	insulin like growth factor binding protein 6	-1.48	5.32e-05
CD44	CD44 molecule (Indian blood group)	-1.48	0.00016
HEY2	hes related family bHLH transcription factor with YRPW motif 2	-1.47	4.08e-07
ID2	inhibitor of DNA binding 2, HLH protein	-1.47	2.73e-05
SH2B3	SH2B adaptor protein 3	-1.47	3.42e-05
TNFRSF12A	TNF receptor superfamily member 12A	-1.47	0.000324
IL13RA2	interleukin 13 receptor subunit alpha 2	-1.46	9.35e-08
H2AFZ	H2A histone family member Z	-1.46	1.26e-05
GRB14	growth factor receptor bound protein 14	-1.46	2.95e-05
TOX2	TOX high mobility group box family member 2	-1.46	0.000149
CCNB1	cyclin B1	-1.46	0.000178
HMMR	hyaluronan mediated motility receptor	-1.44	6.1e-07
PPP1R15A	protein phosphatase 1 regulatory subunit 15A	-1.44	3.02e-05
TSPAN8	tetraspanin 8	-1.44	0.000237
RRP7A	ribosomal RNA processing 7 homolog A	-1.42	1.06e-06
EFHD2	EF-hand domain family member D2	-1.42	1.21e-06
FLNC	filamin C	-1.42	0.00122
MCM6	minichromosome maintenance complex component 6	-1.41	1.04e-05
H3F3C	H3 histone, family 3C	-1.41	2.83e-05
POLA2	DNA polymerase alpha 2, accessory subunit	-1.4	3.06e-06
EBNA1BP2	EBNA1 binding protein 2	-1.4	5.82e-06
CENPN	centromere protein N	-1.39	6.34e-07
SDC1	syndecan 1	-1.39	1.76e-05
DEPDC1	DEP domain containing 1	-1.39	2.52e-05
NCAPD2	non-SMC condensin I complex subunit D2	-1.38	1.58e-05
MMP10	matrix metallopeptidase 10	-1.38	4.83e-05
FABP5	fatty acid binding protein 5	-1.38	7.29e-05
PTGIS	prostaglandin I2 (prostacyclin) synthase	-1.38	0.00019
RANBP1	RAN binding protein 1	-1.37	5.49e-06
OIP5	Opa interacting protein 5	-1.37	5.9e-06
SLIT2	slit guidance ligand 2	-1.37	4.46e-05
SPRY2	sprouty RTK signaling antagonist 2	-1.37	0.000161
MDK	midkine (neurite growth-promoting factor 2)	-1.36	7.5e-06
FST	follistatin	-1.36	1.5e-05
MELK	maternal embryonic leucine zipper kinase	-1.36	1.54e-05
NT5E	5'-nucleotidase ecto	-1.36	0.00243
MN1	MN1 proto-oncogene, transcriptional regulator	-1.35	1.07e-05
TUBA3D	tubulin alpha 3d	-1.35	0.0111
PAQR4	progestin and adipoQ receptor family member 4	-1.34	0.00033
MYO10	myosin X	-1.34	0.00634
SLC14A1	solute carrier family 14 member 1 (Kidd blood group)	-1.33	4.24e-07
SUV39H1	suppressor of variegation 3-9 homolog 1	-1.33	3.37e-05
ECT2	epithelial cell transforming 2	-1.33	0.00312
KIFC1	kinesin family member C1	-1.32	1.25e-06
SPC25	SPC25, NDC80 kinetochore complex component	-1.32	2.69e-06
ADORA2B	adenosine A2b receptor	-1.32	3.12e-06
NKD2	naked cuticle homolog 2	-1.32	1.51e-05
LOC146880	Rho GTPase activating protein 27 pseudogene	-1.32	2.01e-05
GK	glycerol kinase	-1.32	2.43e-05
CSE1L	chromosome segregation 1 like	-1.32	2.56e-05
ADIRF	adipogenesis regulatory factor	-1.32	9.75e-05
HMOX1	heme oxygenase 1	-1.31	3.2e-06
POLE2	DNA polymerase epsilon 2, accessory subunit	-1.3	4.72e-06
RNASEH2A	ribonuclease H2 subunit A	-1.3	2.62e-05
TSPAN13	tetraspanin 13	-1.3	9.81e-05
SMS	spermine synthase	-1.29	1.24e-05
ITGA2	integrin subunit alpha 2	-1.29	2.05e-05
C19orf48	chromosome 19 open reading frame 48	-1.29	5.84e-05
CDK2	cyclin dependent kinase 2	-1.28	8.9e-05
LAMA5	laminin subunit alpha 5	-1.28	0.00925
PLK1	polo like kinase 1	-1.27	7.79e-05
SPDL1	spindle apparatus coiled-coil protein 1	-1.27	0.000118
EXO1	exonuclease 1	-1.26	1.02e-05
DDX39A	DEAD-box helicase 39A	-1.26	1.03e-05
RANGAP1	Ran GTPase activating protein 1	-1.26	3.52e-05
CENPK	centromere protein K	-1.26	3.94e-05
NDC80	NDC80, kinetochore complex component	-1.26	0.000128
CENPW	centromere protein W	-1.26	0.000633
SRSF3	serine and arginine rich splicing factor 3	-1.26	0.00137
TEK	TEK receptor tyrosine kinase	-1.25	5.83e-06
RPS7	ribosomal protein S7	-1.25	0.0012
HCFC1	host cell factor C1	-1.25	0.012
EWSR1	EWS RNA binding protein 1	-1.23	1.5e-06
FAM171A1	family with sequence similarity 171 member A1	-1.23	0.000278
ZNF185	zinc finger protein 185 (LIM domain)	-1.22	7.64e-07
GINS3	GINS complex subunit 3	-1.22	8.97e-07
SHPK	sedoheptulokinase	-1.22	9.83e-06
CDT1	chromatin licensing and DNA replication factor 1	-1.22	0.00072
CENPE	centromere protein E	-1.22	0.00632
ASF1B	anti-silencing function 1B histone chaperone	-1.21	1.66e-06
POLQ	DNA polymerase theta	-1.21	3.44e-06
MMP16	matrix metallopeptidase 16	-1.21	1.4e-05
CENPA	centromere protein A	-1.21	2.56e-05
SKA1	spindle and kinetochore associated complex subunit 1	-1.21	2.81e-05
BDNF	brain derived neurotrophic factor	-1.21	7.84e-05
NUP62	nucleoporin 62	-1.21	0.000145
RRM2	ribonucleotide reductase regulatory subunit M2	-1.2	4.64e-07
KIF14	kinesin family member 14	-1.2	1.46e-06
TXNDC12	thioredoxin domain containing 12	-1.2	7.65e-06
HNRNPR	heterogeneous nuclear ribonucleoprotein R	-1.2	7.57e-05
IRX3	iroquois homeobox 3	-1.2	9.06e-05
FN3KRP	fructosamine 3 kinase related protein	-1.2	0.000921
RFC4	replication factor C subunit 4	-1.19	7.33e-06
TIMELESS	timeless circadian clock	-1.19	1.5e-05
NUDT1	nudix hydrolase 1	-1.19	7.54e-05
FANCG	Fanconi anemia complementation group G	-1.19	0.000241
USP1	ubiquitin specific peptidase 1	-1.18	3.62e-06
RHOBTB3	Rho related BTB domain containing 3	-1.18	5.98e-06
SEMA3A	semaphorin 3A	-1.18	9.71e-06
CTSL	cathepsin L	-1.18	1.86e-05
FOSL1	FOS like 1, AP-1 transcription factor subunit	-1.18	2.77e-05
DTL	denticleless E3 ubiquitin protein ligase homolog	-1.18	6.45e-05
SOX17	SRY-box 17	-1.18	0.000151
HNRNPA2B1	heterogeneous nuclear ribonucleoprotein A2/B1	-1.18	0.00118
ZMIZ1	zinc finger MIZ-type containing 1	-1.18	0.00212
SLC7A11	solute carrier family 7 member 11	-1.17	1.34e-05
CBX5	chromobox 5	-1.17	6.4e-05
KHDRBS1	KH RNA binding domain containing, signal transduction associated 1	-1.17	0.000172
RFWD3	ring finger and WD repeat domain 3	-1.16	0.000438
CDCA7	cell division cycle associated 7	-1.15	1.13e-06
EXOSC8	exosome component 8	-1.15	3.61e-06
SMAD3	SMAD family member 3	-1.15	2.8e-05
PTPRF	protein tyrosine phosphatase, receptor type F	-1.15	0.000117
SLC7A5	solute carrier family 7 member 5	-1.15	0.000282
DDX39B	DEAD-box helicase 39B	-1.15	0.000295
TMEM200A	transmembrane protein 200A	-1.15	0.000538
TROAP	trophinin associated protein	-1.14	9.64e-07
RFC3	replication factor C subunit 3	-1.14	1.38e-06
ORC6	origin recognition complex subunit 6	-1.14	1.22e-05
CHAF1B	chromatin assembly factor 1 subunit B	-1.14	7.43e-05
PRR11	proline rich 11	-1.13	4.57e-06
HNRNPM	heterogeneous nuclear ribonucleoprotein M	-1.13	1.89e-05
ITPRIP	inositol 1,4,5-trisphosphate receptor interacting protein	-1.13	4.91e-05
FANCD2	Fanconi anemia complementation group D2	-1.13	5.94e-05
PAICS	phosphoribosylaminoimidazole carboxylase; phosphoribosylaminoimidazolesuccinocarboxamide synthase	-1.13	6.45e-05
RGS20	regulator of G-protein signaling 20	-1.13	9.75e-05
SMAD6	SMAD family member 6	-1.13	0.000363
RFC5	replication factor C subunit 5	-1.12	5.83e-05
FGL2	fibrinogen like 2	-1.12	0.000109
IL33	interleukin 33	-1.12	0.00955
NOP56	NOP56 ribonucleoprotein	-1.11	1.89e-06
TIMM10	translocase of inner mitochondrial membrane 10 homolog (yeast)	-1.11	1.5e-05
HPRT1	hypoxanthine phosphoribosyltransferase 1	-1.11	1.68e-05
SPOCD1	SPOC domain containing 1	-1.11	0.000154
BTG3	BTG anti-proliferation factor 3	-1.11	0.000189
CKS2	CDC28 protein kinase regulatory subunit 2	-1.1	6.54e-06
CDCA2	cell division cycle associated 2	-1.1	7.94e-06
MTHFD1L	methylenetetrahydrofolate dehydrogenase (NADP+ dependent) 1-like	-1.1	2.34e-05
RBM14	RNA binding motif protein 14	-1.1	4.1e-05
TSKU	tsukushi, small leucine rich proteoglycan	-1.1	0.000241
TRA2B	transformer 2 beta homolog (Drosophila)	-1.1	0.00175
DDIAS	DNA damage induced apoptosis suppressor	-1.09	7.74e-06
SH3KBP1	SH3 domain containing kinase binding protein 1	-1.09	1.39e-05
CKAP2	cytoskeleton associated protein 2	-1.09	1.65e-05
SERTAD2	SERTA domain containing 2	-1.09	5.86e-05
RPS24	ribosomal protein S24	-1.09	0.000348
SLC20A1	solute carrier family 20 member 1	-1.09	0.000777
FAM83D	family with sequence similarity 83 member D	-1.07	3.81e-05
SF3B4	splicing factor 3b subunit 4	-1.07	0.000203
CSTF3	cleavage stimulation factor subunit 3	-1.06	3.19e-06
KNTC1	kinetochore associated 1	-1.06	3.92e-05
EXOSC6	exosome component 6	-1.06	5.56e-05
SLC3A2	solute carrier family 3 member 2	-1.06	6.33e-05
SPAG9	sperm associated antigen 9	-1.06	7.51e-05
FHL2	four and a half LIM domains 2	-1.06	0.000508
LMNA	lamin A/C	-1.06	0.000564
CD24	CD24 molecule	-1.06	0.000591
MCM4	minichromosome maintenance complex component 4	-1.05	1.52e-06
NOL6	nucleolar protein 6	-1.05	1.89e-06
CCDC34	coiled-coil domain containing 34	-1.05	1.59e-05
GFPT2	glutamine-fructose-6-phosphate transaminase 2	-1.05	1.85e-05
FZD8	frizzled class receptor 8	-1.05	3.69e-05
LRIG1	leucine rich repeats and immunoglobulin like domains 1	-1.05	0.000118
OAF	out at first homolog	-1.05	0.000175
GMNN	geminin, DNA replication inhibitor	-1.05	0.00119
NT5C	5', 3'-nucleotidase, cytosolic	-1.05	0.00827
ACOT7	acyl-CoA thioesterase 7	-1.04	2.22e-05
FJX1	four jointed box 1	-1.04	0.000107
GREM2	gremlin 2, DAN family BMP antagonist	-1.03	1.04e-05
IL4R	interleukin 4 receptor	-1.03	3.53e-05
SRSF1	serine and arginine rich splicing factor 1	-1.03	4.6e-05
PDXP	pyridoxal phosphatase	-1.03	0.000117
HSPB11	heat shock protein family B (small) member 11	-1.03	0.000157
WLS	wntless Wnt ligand secretion mediator	-1.03	0.000315
SYNCRIP	synaptotagmin binding cytoplasmic RNA interacting protein	-1.03	0.000362
NCAPG2	non-SMC condensin II complex subunit G2	-1.02	7.33e-06
PPP1R14B	protein phosphatase 1 regulatory inhibitor subunit 14B	-1.02	8.9e-05
TPR	translocated promoter region, nuclear basket protein	-1.02	0.000344
DRAP1	DR1 associated protein 1	-1.02	0.00134
GATAD2A	GATA zinc finger domain containing 2A	-1.02	0.00148
SPHK1	sphingosine kinase 1	-1.02	0.00176
GPR4	G protein-coupled receptor 4	-1.01	2.04e-06
PARP1	poly(ADP-ribose) polymerase 1	-1.01	0.000101
AXL	AXL receptor tyrosine kinase	-1.01	0.000318
CBFB	core-binding factor beta subunit	-1.01	0.00198
DEK	DEK proto-oncogene	-1.01	0.0139
CALCOCO2	calcium binding and coiled-coil domain 2	1.01	1.3e-06
ST6GAL1	ST6 beta-galactoside alpha-2,6-sialyltransferase 1	1.01	5.9e-06
PHPT1	phosphohistidine phosphatase 1	1.01	3.43e-05
CHST7	carbohydrate sulfotransferase 7	1.01	5.91e-05
MFAP2	microfibrillar associated protein 2	1.01	9.16e-05
CDKN1C	cyclin dependent kinase inhibitor 1C	1.02	1.21e-06
ARMCX3	armadillo repeat containing, X-linked 3	1.02	1.41e-06
HTR2B	5-hydroxytryptamine receptor 2B	1.02	4.54e-06
GNPTG	N-acetylglucosamine-1-phosphate transferase gamma subunit	1.02	0.000273
GDE1	glycerophosphodiester phosphodiesterase 1	1.02	0.000459
IRAK3	interleukin 1 receptor associated kinase 3	1.03	2.9e-06
LOXL4	lysyl oxidase like 4	1.03	1.38e-05
ANG	angiogenin	1.03	1.58e-05
RNF217	ring finger protein 217	1.03	2.33e-05
HSD17B12	hydroxysteroid 17-beta dehydrogenase 12	1.03	0.000125
ANGPTL4	angiopoietin like 4	1.03	0.000149
TYMP	thymidine phosphorylase	1.03	0.00024
SHROOM3	shroom family member 3	1.04	2.54e-05
LBH	limb bud and heart development	1.04	0.000163
TST	thiosulfate sulfurtransferase	1.04	0.000246
DAPK1	death associated protein kinase 1	1.04	0.000491
STMN2	stathmin 2	1.05	4.71e-07
IGIP	IgA inducing protein	1.05	3.43e-05
PLEKHA1	pleckstrin homology domain containing A1	1.05	0.000131
RABAC1	Rab acceptor 1	1.05	0.000439
TGFBR2	transforming growth factor beta receptor 2	1.05	0.000608
ACVR2A	activin A receptor type 2A	1.05	0.00259
PLAC9	placenta specific 9	1.06	1.33e-06
GSTM2	glutathione S-transferase mu 2 (muscle)	1.06	1.45e-05
GLRB	glycine receptor beta	1.06	2.56e-05
RNASE4	ribonuclease A family member 4	1.06	2.87e-05
SERF2	small EDRK-rich factor 2	1.06	0.002
EIF4A2	eukaryotic translation initiation factor 4A2	1.06	0.00435
GBP2	guanylate binding protein 2	1.07	3.18e-06
OSBPL10	oxysterol binding protein like 10	1.07	1.13e-05
TRIM22	tripartite motif containing 22	1.07	8.93e-05
HEBP1	heme binding protein 1	1.07	0.000175
IFNGR1	interferon gamma receptor 1	1.07	0.000495
ANKRD33	ankyrin repeat domain 33	1.07	0.00185
PAX8	paired box 8	1.08	2.77e-06
OPN3	opsin 3	1.08	1.33e-05
TNFRSF14	TNF receptor superfamily member 14	1.08	1.58e-05
CERS6	ceramide synthase 6	1.08	2.95e-05
PCMTD1	protein-L-isoaspartate (D-aspartate) O-methyltransferase domain containing 1	1.08	4.3e-05
SC5D	sterol-C5-desaturase	1.08	5.8e-05
TBC1D2B	TBC1 domain family member 2B	1.08	0.000106
TPST2	tyrosylprotein sulfotransferase 2	1.09	6.76e-06
DNAJB9	DnaJ heat shock protein family (Hsp40) member B9	1.09	8.1e-06
CCDC80	coiled-coil domain containing 80	1.09	9.83e-06
NEO1	neogenin 1	1.09	0.000109
KDELR3	KDEL endoplasmic reticulum protein retention receptor 3	1.09	0.000164
SNAI2	snail family transcriptional repressor 2	1.09	0.000301
HIST2H2AC	histone cluster 2, H2ac	1.1	4.71e-07
PPARG	peroxisome proliferator activated receptor gamma	1.1	1.68e-06
CPED1	cadherin like and PC-esterase domain containing 1	1.1	1.85e-05
CTSH	cathepsin H	1.1	3.74e-05
TMEM97	transmembrane protein 97	1.1	7.33e-05
GNPDA1	glucosamine-6-phosphate deaminase 1	1.1	7.7e-05
ALDH1B1	aldehyde dehydrogenase 1 family member B1	1.1	0.000598
FOXN3	forkhead box N3	1.1	0.000746
FAM210B	family with sequence similarity 210 member B	1.1	0.00487
HACD2	3-hydroxyacyl-CoA dehydratase 2	1.11	1.94e-06
DBNDD2	dysbindin domain containing 2	1.11	3.31e-06
SSPN	sarcospan	1.11	7.67e-06
JAZF1	JAZF zinc finger 1	1.11	7.94e-06
ALAD	aminolevulinate dehydratase	1.11	0.000154
RRAS	related RAS viral (r-ras) oncogene homolog	1.11	0.000369
SHISA3	shisa family member 3	1.12	1.67e-05
SLC27A3	solute carrier family 27 member 3	1.12	2.61e-05
CCPG1	cell cycle progression 1	1.13	1.25e-06
STARD5	StAR related lipid transfer domain containing 5	1.13	6.7e-06
ABCA8	ATP binding cassette subfamily A member 8	1.13	4.91e-05
SPRY1	sprouty RTK signaling antagonist 1	1.13	5.63e-05
TSPAN6	tetraspanin 6	1.13	0.000118
CALD1	caldesmon 1	1.13	0.00012
TMEM47	transmembrane protein 47	1.13	0.000153
ADH1B	alcohol dehydrogenase 1B (class I), beta polypeptide	1.14	1.92e-06
KLHL24	kelch like family member 24	1.14	1.47e-05
SH3D19	SH3 domain containing 19	1.14	0.000175
ANKRD6	ankyrin repeat domain 6	1.15	2.29e-06
ITPR1	inositol 1,4,5-trisphosphate receptor type 1	1.15	2.65e-06
PLTP	phospholipid transfer protein	1.15	2.97e-05
DPT	dermatopontin	1.15	3.02e-05
CST3	cystatin C	1.15	0.000147
RAB8B	RAB8B, member RAS oncogene family	1.15	0.000175
TSPO	translocator protein	1.16	1.45e-05
TMEM45A	transmembrane protein 45A	1.16	1.51e-05
SRGN	serglycin	1.16	1.91e-05
ARHGDIB	Rho GDP dissociation inhibitor beta	1.16	2.95e-05
RHOQ	ras homolog family member Q	1.16	4.68e-05
DSE	dermatan sulfate epimerase	1.16	0.000192
SEPTIN11	septin 11	1.16	0.000564
NSG1	neuron specific gene family member 1	1.17	3e-06
MYH11	myosin heavy chain 11	1.17	0.000297
BGN	biglycan	1.17	0.00297
CDKN2B	cyclin dependent kinase inhibitor 2B	1.18	1.25e-06
HIST1H4H	histone cluster 1, H4h	1.18	4.43e-06
UCHL1	ubiquitin C-terminal hydrolase L1	1.18	9.02e-06
GCHFR	GTP cyclohydrolase I feedback regulator	1.18	3.42e-05
S100A13	S100 calcium binding protein A13	1.18	6.07e-05
ITLN1	intelectin 1	1.19	2.14e-06
MAN1C1	mannosidase alpha class 1C member 1	1.19	6.26e-06
SEC14L1	SEC14 like lipid binding 1	1.19	9.71e-06
UPP1	uridine phosphorylase 1	1.19	5.27e-05
AEBP1	AE binding protein 1	1.19	0.0364
GSTM3	glutathione S-transferase mu 3	1.2	1.12e-06
NNMT	nicotinamide N-methyltransferase	1.2	6.59e-05
TRAK2	trafficking kinesin protein 2	1.21	2.69e-06
MGST1	microsomal glutathione S-transferase 1	1.21	1.8e-05
MLPH	melanophilin	1.21	9.12e-05
TPP1	tripeptidyl peptidase 1	1.21	0.00212
HPS5	HPS5, biogenesis of lysosomal organelles complex 2 subunit 2	1.22	7.79e-07
GCNT1	glucosaminyl (N-acetyl) transferase 1, core 2	1.22	8e-07
NUAK1	NUAK family kinase 1	1.22	2.34e-05
IFITM2	interferon induced transmembrane protein 2	1.22	3.42e-05
PRKD1	protein kinase D1	1.23	2.04e-05
HSPB2	heat shock protein family B (small) member 2	1.23	2.56e-05
SPARCL1	SPARC like 1	1.24	7.65e-07
SLMAP	sarcolemma associated protein	1.24	4.44e-05
SERPING1	serpin family G member 1	1.24	8.4e-05
LAMP2	lysosomal associated membrane protein 2	1.25	7.94e-06
SLC35F5	solute carrier family 35 member F5	1.25	0.000163
YPEL3	yippee like 3	1.26	2.53e-07
CROT	carnitine O-octanoyltransferase	1.26	0.000218
ABCA6	ATP binding cassette subfamily A member 6	1.27	5.16e-07
LIMS2	LIM zinc finger domain containing 2	1.27	5.91e-06
CD302	CD302 molecule	1.27	2.17e-05
SCPEP1	serine carboxypeptidase 1	1.27	3.4e-05
CEBPB	CCAAT/enhancer binding protein beta	1.27	4.17e-05
TMEM150A	transmembrane protein 150A	1.27	4.58e-05
SELM	selenoprotein M	1.27	8.71e-05
AXIN2	axin 2	1.28	1.37e-07
VGLL3	vestigial like family member 3	1.28	4.29e-06
LHFP	lipoma HMGIC fusion partner	1.28	0.000111
RASD1	ras related dexamethasone induced 1	1.28	0.00131
IRS2	insulin receptor substrate 2	1.29	2.47e-05
TMEM204	transmembrane protein 204	1.29	0.000104
MID1	midline 1	1.29	0.00011
IGFBP2	insulin like growth factor binding protein 2	1.29	0.00374
SEPP1	selenoprotein P, plasma, 1	1.3	1.06e-06
GSTT1	glutathione S-transferase theta 1	1.3	1.94e-06
NEDD9	neural precursor cell expressed, developmentally down-regulated 9	1.3	5.77e-06
YPEL5	yippee like 5	1.3	6.6e-05
CDC42EP5	CDC42 effector protein 5	1.31	1.46e-06
ARL6IP5	ADP ribosylation factor like GTPase 6 interacting protein 5	1.31	1.71e-05
THRA	thyroid hormone receptor, alpha	1.32	6.94e-05
COMP	cartilage oligomeric matrix protein	1.32	7.02e-05
SERPINA5	serpin family A member 5	1.33	1.4e-05
ZMAT3	zinc finger matrin-type 3	1.34	5.37e-07
SORBS2	sorbin and SH3 domain containing 2	1.34	1.06e-06
STAT2	signal transducer and activator of transcription 2	1.34	2.29e-06
PKD2	polycystin 2, transient receptor potential cation channel	1.34	7.25e-05
LEPROT	leptin receptor overlapping transcript	1.34	7.44e-05
HIST1H2AC	histone cluster 1, H2ac	1.35	1.92e-06
COL8A2	collagen type VIII alpha 2 chain	1.35	1.71e-05
COL11A1	collagen type XI alpha 1 chain	1.35	2.23e-05
ASS1	argininosuccinate synthase 1	1.36	7.31e-07
TSPAN9	tetraspanin 9	1.36	1.34e-05
SLC2A10	solute carrier family 2 member 10	1.37	5.24e-05
COL4A2	collagen type IV alpha 2 chain	1.37	0.00497
RAMP1	receptor activity modifying protein 1	1.39	1.49e-07
RFTN2	raftlin family member 2	1.39	4.71e-07
CBS	cystathionine-beta-synthase	1.39	1.32e-06
THY1	Thy-1 cell surface antigen	1.39	2.73e-06
PPIC	peptidylprolyl isomerase C	1.39	9.82e-06
MAP1LC3A	microtubule associated protein 1 light chain 3 alpha	1.4	3.06e-05
TMEM159	transmembrane protein 159	1.4	3.69e-05
ALCAM	activated leukocyte cell adhesion molecule	1.4	0.00146
RAP2A	RAP2A, member of RAS oncogene family	1.41	2.5e-06
PGM1	phosphoglucomutase 1	1.41	1.11e-05
CREG1	cellular repressor of E1A stimulated genes 1	1.41	0.000101
ELL2	elongation factor for RNA polymerase II 2	1.41	0.000191
SMPDL3A	sphingomyelin phosphodiesterase acid like 3A	1.42	3.42e-05
FSTL3	follistatin like 3	1.42	5.93e-05
MFGE8	milk fat globule-EGF factor 8 protein	1.42	0.00195
N4BP2L2	NEDD4 binding protein 2 like 2	1.43	3.35e-06
ARHGEF6	Rac/Cdc42 guanine nucleotide exchange factor 6	1.44	7.61e-08
ITGAV	integrin subunit alpha V	1.44	9.86e-05
ITGA11	integrin subunit alpha 11	1.44	0.000162
MSRB3	methionine sulfoxide reductase B3	1.45	7.37e-07
TCEAL1	transcription elongation factor A like 1	1.45	1e-05
THBS1	thrombospondin 1	1.45	0.00198
ZNF106	zinc finger protein 106	1.46	2.03e-07
OMD	osteomodulin	1.47	1.32e-07
RARRES3	retinoic acid receptor responder 3	1.47	1.06e-06
IFITM1	interferon induced transmembrane protein 1	1.47	0.000434
FMOD	fibromodulin	1.48	7.65e-05
CITED2	Cbp/p300 interacting transactivator with Glu/Asp rich carboxy-terminal domain 2	1.48	0.000107
CPQ	carboxypeptidase Q	1.49	1.69e-06
ERRFI1	ERBB receptor feedback inhibitor 1	1.49	5.49e-06
H2AFJ	H2A histone family member J	1.49	0.000121
KCNK6	potassium two pore domain channel subfamily K member 6	1.5	8.84e-06
DDAH1	dimethylarginine dimethylaminohydrolase 1	1.5	2.87e-05
C1S	complement component 1, s subcomponent	1.5	5.76e-05
IFITM3	interferon induced transmembrane protein 3	1.51	0.000137
ADRA1B	adrenoceptor alpha 1B	1.52	1.34e-05
PRSS23	protease, serine 23	1.52	0.000248
ZBTB16	zinc finger and BTB domain containing 16	1.53	9.35e-08
SGCG	sarcoglycan gamma	1.54	2.18e-07
FHL1	four and a half LIM domains 1	1.55	4.43e-06
DKK3	dickkopf WNT signaling pathway inhibitor 3	1.55	5.26e-06
MT1M	metallothionein 1M	1.55	5.19e-05
CTSD	cathepsin D	1.57	0.000149
SPINT2	serine peptidase inhibitor, Kunitz type 2	1.58	3.83e-06
CRISPLD2	cysteine rich secretory protein LCCL domain containing 2	1.58	4.08e-06
PODN	podocan	1.6	9.02e-06
IFI44L	interferon induced protein 44 like	1.61	2.78e-06
HIST2H2AA3	histone cluster 2, H2aa3	1.61	1.25e-05
GPX3	glutathione peroxidase 3	1.61	3.66e-05
SERPINF1	serpin family F member 1	1.61	6.76e-05
AKR1C3	aldo-keto reductase family 1, member C3	1.62	1.48e-07
SNORD13	small nucleolar RNA, C/D box 13	1.62	0.000139
MXD4	MAX dimerization protein 4	1.63	1.5e-05
HACD1	3-hydroxyacyl-CoA dehydratase 1	1.63	4.96e-05
TIMP4	TIMP metallopeptidase inhibitor 4	1.65	2.74e-07
PLIN2	perilipin 2	1.65	5.82e-06
PTN	pleiotrophin	1.65	1.34e-05
HIST1H1C	histone cluster 1, H1c	1.67	1.38e-05
MTSS1	metastasis suppressor 1	1.67	1.44e-05
DEPTOR	DEP domain containing MTOR-interacting protein	1.68	1.06e-06
EFHD1	EF-hand domain family member D1	1.69	7.85e-06
FAM46B	family with sequence similarity 46 member B	1.7	2.25e-06
C6	complement component 6	1.7	3.26e-06
TCEAL3	transcription elongation factor A like 3	1.7	4.43e-06
GRAMD3	GRAM domain containing 3	1.72	2.89e-06
ADARB1	adenosine deaminase, RNA specific B1	1.72	3.03e-06
RPRML	reprimo like	1.72	6.81e-06
GLRX	glutaredoxin	1.72	0.00012
PALLD	palladin, cytoskeletal associated protein	1.73	4.64e-07
HIST1H2BD	histone cluster 1, H2bd	1.73	1.25e-06
HSPA2	heat shock protein family A (Hsp70) member 2	1.73	8.61e-06
WISP1	WNT1 inducible signaling pathway protein 1	1.74	1.95e-06
HTRA1	HtrA serine peptidase 1	1.74	0.000107
LAMA2	laminin subunit alpha 2	1.74	0.000359
SUGCT	succinyl-CoA:glutarate-CoA transferase	1.76	8.33e-07
SLC46A3	solute carrier family 46 member 3	1.77	6.08e-08
KRT7	keratin 7	1.77	3.8e-07
ECM2	extracellular matrix protein 2	1.77	5.51e-07
MGARP	mitochondria localized glutamic acid rich protein	1.77	8.03e-07
S100A4	S100 calcium binding protein A4	1.77	1.89e-06
GPNMB	glycoprotein nmb	1.77	4.56e-05
TNFRSF11B	TNF receptor superfamily member 11b	1.78	1.97e-07
TEX2	testis expressed 2	1.78	1.44e-06
OLFML3	olfactomedin like 3	1.78	4.12e-06
CNN1	calponin 1	1.79	2.18e-07
TMTC1	transmembrane and tetratricopeptide repeat containing 1	1.79	7.65e-07
SLC2A5	solute carrier family 2 member 5	1.82	3.8e-07
DDIT4	DNA damage inducible transcript 4	1.82	4.6e-06
PLSCR4	phospholipid scramblase 4	1.83	4.17e-06
GSN	gelsolin	1.83	4.83e-05
SH3BGRL	SH3 domain binding glutamate rich protein like	1.84	0.000117
ITLN2	intelectin 2	1.85	5.47e-08
ADM	adrenomedullin	1.86	1.17e-06
METTL7A	methyltransferase like 7A	1.88	0.000261
A2M	alpha-2-macroglobulin	1.91	1.06e-06
CYBRD1	cytochrome b reductase 1	1.91	2.42e-06
TCEAL4	transcription elongation factor A like 4	1.92	5.47e-08
OPTN	optineurin	1.92	2.22e-07
FOXO1	forkhead box O1	1.92	7.25e-06
HSPB6	heat shock protein family B (small) member 6	1.92	0.000804
AOX1	aldehyde oxidase 1	1.94	5.04e-06
KCNT2	potassium sodium-activated channel subfamily T member 2	1.95	1.84e-07
QPRT	quinolinate phosphoribosyltransferase	1.96	1.83e-06
RPS6KA2	ribosomal protein S6 kinase A2	1.97	2.1e-07
C7	complement component 7	1.98	2.14e-06
MT1X	metallothionein 1X	1.98	5.9e-06
SVEP1	sushi, von Willebrand factor type A, EGF and pentraxin domain containing 1	1.98	0.000149
SUSD2	sushi domain containing 2	2	5.02e-06
NEXN	nexilin F-actin binding protein	2	3.06e-05
PRUNE2	prune homolog 2	2.01	5.03e-08
ANKRD1	ankyrin repeat domain 1	2.01	0.000121
SFRP4	secreted frizzled related protein 4	2.03	1.95e-06
GREM1	gremlin 1, DAN family BMP antagonist	2.06	4.43e-06
SRPX2	sushi repeat containing protein, X-linked 2	2.06	5.65e-05
OXTR	oxytocin receptor	2.07	1.49e-07
ALPK2	alpha kinase 2	2.07	6.64e-07
ATP8B4	ATPase phospholipid transporting 8B4 (putative)	2.09	7.21e-08
FBLN5	fibulin 5	2.09	1.26e-05
C5orf46	chromosome 5 open reading frame 46	2.1	4.71e-07
MFAP4	microfibrillar associated protein 4	2.11	7.51e-05
SOD2	superoxide dismutase 2, mitochondrial	2.12	2.14e-07
PDGFRB	platelet derived growth factor receptor beta	2.14	1.16e-05
APOE	apolipoprotein E	2.15	4.21e-07
TAGLN	transgelin	2.17	6.7e-06
RASL11B	RAS like family 11 member B	2.19	8.39e-08
RPS29	ribosomal protein S29	2.19	3.93e-07
CFH	complement factor H	2.19	5.16e-07
EPAS1	endothelial PAS domain protein 1	2.2	7.09e-06
MYLK	myosin light chain kinase	2.21	1.55e-06
CLIC3	chloride intracellular channel 3	2.24	1.46e-06
C1orf198	chromosome 1 open reading frame 198	2.25	1.38e-06
SORT1	sortilin 1	2.28	6.15e-08
CD14	CD14 molecule	2.28	1.26e-06
MMP23B	matrix metallopeptidase 23B	2.29	7.59e-07
DUSP23	dual specificity phosphatase 23	2.32	6.87e-07
RAB11FIP1	RAB11 family interacting protein 1	2.35	5.47e-08
CTHRC1	collagen triple helix repeat containing 1	2.37	5.3e-06
MYL9	myosin light chain 9	2.46	7.58e-08
CD34	CD34 molecule	2.46	3.8e-07
MME	membrane metallo-endopeptidase	2.48	1.06e-06
GAS1	growth arrest specific 1	2.5	1.97e-07
SERPINA3	serpin family A member 3	2.51	4.26e-07
COL4A1	collagen type IV alpha 1 chain	2.51	1.53e-06
LMO3	LIM domain only 3	2.52	2.21e-08
SAA1	serum amyloid A1	2.52	5.03e-08
NPTX2	neuronal pentraxin 2	2.53	1.26e-07
DCN	decorin	2.53	2.16e-07
PDE1A	phosphodiesterase 1A	2.54	1.38e-07
C11orf96	chromosome 11 open reading frame 96	2.54	7.21e-07
COX7A1	cytochrome c oxidase subunit 7A1	2.58	7.55e-08
C1QTNF5	C1q and tumor necrosis factor related protein 5	2.58	2.42e-06
FBLN1	fibulin 1	2.58	1.16e-05
NUPR1	nuclear protein 1, transcriptional regulator	2.6	7.85e-07
HIST1H2BK	histone cluster 1, H2bk	2.65	3.89e-08
CRYAB	crystallin alpha B	2.65	1.24e-06
LMCD1	LIM and cysteine rich domains 1	2.71	5.97e-08
FKBP5	FK506 binding protein 5	2.72	7.62e-08
TXNIP	thioredoxin interacting protein	2.72	1.26e-07
GAS6	growth arrest specific 6	2.72	3.93e-06
GLS	glutaminase	2.73	1.39e-07
POSTN	periostin	2.74	3.2e-06
PDGFD	platelet derived growth factor D	2.78	7.35e-08
BEX1	brain expressed X-linked 1	2.84	1.15e-07
TMEM119	transmembrane protein 119	2.84	7.31e-07
PLCXD3	phosphatidylinositol specific phospholipase C X domain containing 3	2.86	6.91e-07
HSD11B1	hydroxysteroid 11-beta dehydrogenase 1	2.87	4.98e-07
C10orf10	chromosome 10 open reading frame 10	2.87	6.78e-07
ADH1A	alcohol dehydrogenase 1A (class I), alpha polypeptide	2.89	4.21e-07
PTGDS	prostaglandin D2 synthase	2.92	6.08e-08
TSC22D3	TSC22 domain family member 3	2.97	4.71e-07
ACTA2	actin, alpha 2, smooth muscle, aorta	2.97	5.69e-07
CTSK	cathepsin K	2.98	5.47e-08
LEP	leptin	3.09	5.13e-07
PROS1	protein S (alpha)	3.16	6.52e-07
FBXO32	F-box protein 32	3.21	1.26e-07
COL8A1	collagen type VIII alpha 1 chain	3.26	2.19e-08
FNDC1	fibronectin type III domain containing 1	3.3	1.5e-05
SLC40A1	solute carrier family 40 member 1	3.34	3.89e-08
LUM	lumican	3.48	1.11e-07
INMT	indolethylamine N-methyltransferase	3.49	9.49e-08
PPP1R14A	protein phosphatase 1 regulatory inhibitor subunit 14A	3.65	6.3e-08
ACTG2	actin, gamma 2, smooth muscle, enteric	3.73	2.06e-07
RGCC	regulator of cell cycle	4.05	5.1e-09
MAOA	monoamine oxidase A	4.25	5.03e-08
MGP	matrix Gla protein	4.35	5.1e-09
APOD	apolipoprotein D	4.62	6.08e-09

## Sheet: 12VS0-adj.P.value<0.0-|logFC|>1
List of DEGs in CVSMCs cultured for 12 days in calcified medium
Gene.symbol	Gene name	logFC	adj.P.Val
CXCL8	C-X-C motif chemokine ligand 8	-5.43	1.31e-08
ANXA10	annexin A10	-4.84	5.79e-09
SOST	sclerostin	-4.47	3.71e-09
DIRAS3	DIRAS family GTPase 3	-4.4	1.15e-08
CDC20	cell division cycle 20	-3.95	5.37e-08
ALDH1A3	aldehyde dehydrogenase 1 family member A3	-3.87	1.13e-08
IL1B	interleukin 1 beta	-3.79	6.8e-07
MMP1	matrix metallopeptidase 1	-3.77	2.95e-05
UBE2C	ubiquitin conjugating enzyme E2 C	-3.75	3.73e-09
TGFBI	transforming growth factor beta induced	-3.73	9.85e-09
TYMS	thymidylate synthetase	-3.66	1.59e-06
PRC1	protein regulator of cytokinesis 1	-3.53	5.79e-09
TOP2A	topoisomerase (DNA) II alpha	-3.44	1.33e-07
TUBB3	tubulin beta 3 class III	-3.44	1.82e-07
UHRF1	ubiquitin like with PHD and ring finger domains 1	-3.29	1.13e-08
MCM7	minichromosome maintenance complex component 7	-3.24	8.19e-08
CCL2	C-C motif chemokine ligand 2	-3.17	5.34e-08
PTTG1	pituitary tumor-transforming 1	-3.13	5.2e-08
LPXN	leupaxin	-3.1	1.15e-08
ID1	inhibitor of DNA binding 1, HLH protein	-3.08	2.96e-08
CCNB2	cyclin B2	-3.07	4.97e-09
HMGA1	high mobility group AT-hook 1	-3.06	5.79e-09
CDH6	cadherin 6	-3.06	9.73e-09
KIAA0101	KIAA0101	-3.05	4.27e-08
PLAU	plasminogen activator, urokinase	-3.03	1.96e-08
PTTG3P	pituitary tumor-transforming 3, pseudogene	-3.02	9.3e-07
PHLDA1	pleckstrin homology like domain family A member 1	-3.01	3.28e-07
CXCL6	C-X-C motif chemokine ligand 6	-2.94	8.34e-07
CXCL1	C-X-C motif chemokine ligand 1	-2.92	1.85e-05
KIF20A	kinesin family member 20A	-2.91	1.46e-08
CCNA2	cyclin A2	-2.79	2.96e-08
CEP55	centrosomal protein 55	-2.74	4.45e-08
GINS2	GINS complex subunit 2	-2.71	4.79e-08
TRIP13	thyroid hormone receptor interactor 13	-2.66	1.28e-08
COL13A1	collagen type XIII alpha 1 chain	-2.63	7.19e-08
COLEC12	collectin subfamily member 12	-2.61	3.11e-08
AURKA	aurora kinase A	-2.61	1.71e-07
CDCA5	cell division cycle associated 5	-2.59	5.85e-08
BIRC5	baculoviral IAP repeat containing 5	-2.54	1.32e-07
TK1	thymidine kinase 1	-2.53	8.76e-07
MALL	mal, T-cell differentiation protein like	-2.53	4.14e-06
APCDD1L	APC down-regulated 1 like	-2.52	2.47e-07
TFPI2	tissue factor pathway inhibitor 2	-2.51	4.3e-06
SLC7A1	solute carrier family 7 member 1	-2.49	6.75e-07
TUBA1C	tubulin alpha 1c	-2.48	1.82e-07
LXN	latexin	-2.44	2.22e-06
NCAPG	non-SMC condensin I complex subunit G	-2.43	1.37e-06
CDC45	cell division cycle 45	-2.42	1.78e-07
PRSS3	protease, serine 3	-2.42	2.71e-07
PRRX2	paired related homeobox 2	-2.42	7.06e-07
IGFBP6	insulin like growth factor binding protein 6	-2.42	3.67e-06
FEN1	flap structure-specific endonuclease 1	-2.39	7.32e-08
LMNB2	lamin B2	-2.38	4.27e-08
MAD2L1	MAD2 mitotic arrest deficient-like 1 (yeast)	-2.38	5.26e-05
ODC1	ornithine decarboxylase 1	-2.36	2.35e-07
PFKP	phosphofructokinase, platelet	-2.33	3.47e-07
ANLN	anillin actin binding protein	-2.32	3.93e-07
KIF11	kinesin family member 11	-2.29	4.23e-06
GABBR2	gamma-aminobutyric acid type B receptor subunit 2	-2.28	9.85e-09
PODXL	podocalyxin like	-2.27	4.12e-08
ASPM	abnormal spindle microtubule assembly	-2.27	4.81e-08
CRIP1	cysteine rich protein 1	-2.27	4.68e-07
CENPM	centromere protein M	-2.27	1.07e-06
PBK	PDZ binding kinase	-2.26	1.88e-07
CDK1	cyclin dependent kinase 1	-2.25	1.04e-06
BMP2	bone morphogenetic protein 2	-2.22	2.47e-06
TUBB4B	tubulin beta 4B class IVb	-2.19	2.28e-07
DHRS3	dehydrogenase/reductase 3	-2.19	8.04e-06
DDX10	DEAD-box helicase 10	-2.18	4.6e-07
CKAP2L	cytoskeleton associated protein 2 like	-2.18	6.93e-07
CENPF	centromere protein F	-2.17	7.6e-08
HIST1H4C	histone cluster 1, H4c	-2.16	1.11e-05
MCM3	minichromosome maintenance complex component 3	-2.14	4.59e-07
DLGAP5	DLG associated protein 5	-2.14	1.13e-06
NTM	neurotrimin	-2.13	1.01e-07
FAM64A	family with sequence similarity 64 member A	-2.11	3e-08
CDCA3	cell division cycle associated 3	-2.1	9.22e-07
TUBA1A	tubulin alpha 1a	-2.08	3.62e-07
DNAJC9	DnaJ heat shock protein family (Hsp40) member C9	-2.08	7.65e-07
NT5E	5'-nucleotidase ecto	-2.03	0.000114
PTGIS	prostaglandin I2 (prostacyclin) synthase	-2.02	3.86e-05
PAPPA	pappalysin 1	-2.01	1.13e-08
NDUFA4L2	NDUFA4, mitochondrial complex associated like 2	-2.01	2.06e-06
SLC20A1	solute carrier family 20 member 1	-2	2.84e-07
FBXO5	F-box protein 5	-2	1.63e-06
HNRNPD	heterogeneous nuclear ribonucleoprotein D	-2	2.41e-06
HJURP	Holliday junction recognition protein	-1.99	5.79e-09
DNMT1	DNA (cytosine-5-)-methyltransferase 1	-1.99	6.17e-06
CDKN3	cyclin dependent kinase inhibitor 3	-1.99	9.53e-06
BUB1	BUB1 mitotic checkpoint serine/threonine kinase	-1.98	4.06e-07
DCBLD2	discoidin, CUB and LCCL domain containing 2	-1.97	1.6e-07
AURKB	aurora kinase B	-1.96	2.11e-07
RACGAP1	Rac GTPase activating protein 1	-1.94	5.16e-07
BDKRB1	bradykinin receptor B1	-1.94	1.65e-06
HMGN2	high mobility group nucleosomal binding domain 2	-1.93	5.68e-06
TNFRSF12A	TNF receptor superfamily member 12A	-1.91	9.65e-07
STMN1	stathmin 1	-1.9	3.28e-07
TUBA1B	tubulin alpha 1b	-1.9	1.77e-06
SRSF2	serine and arginine rich splicing factor 2	-1.9	4.95e-06
TRMT5	tRNA methyltransferase 5	-1.88	8.33e-07
NEK2	NIMA related kinase 2	-1.88	6.7e-05
RRM1	ribonucleotide reductase catalytic subunit M1	-1.87	1.4e-07
PTMA	prothymosin, alpha	-1.87	0.016
CREB3L2	cAMP responsive element binding protein 3 like 2	-1.86	3.07e-06
CD44	CD44 molecule (Indian blood group)	-1.84	2.15e-05
LAMA5	laminin subunit alpha 5	-1.82	6.64e-06
PCNA	proliferating cell nuclear antigen	-1.82	9.48e-05
TUBA3D	tubulin alpha 3d	-1.82	0.000399
TM4SF1	transmembrane 4 L six family member 1	-1.81	4.38e-07
NCEH1	neutral cholesterol ester hydrolase 1	-1.81	1.51e-06
GALNT12	polypeptide N-acetylgalactosaminyltransferase 12	-1.8	2.16e-08
PRDM8	PR/SET domain 8	-1.8	1.13e-05
EFHD2	EF-hand domain family member D2	-1.79	1.29e-07
E2F7	E2F transcription factor 7	-1.78	1.57e-07
MCM10	minichromosome maintenance 10 replication initiation factor	-1.78	4.36e-07
PLEK2	pleckstrin 2	-1.78	7.15e-07
CD55	CD55 molecule (Cromer blood group)	-1.77	8.39e-06
PTGS2	prostaglandin-endoperoxide synthase 2	-1.76	3.13e-05
DRAP1	DR1 associated protein 1	-1.76	0.000139
ADGRG1	adhesion G protein-coupled receptor G1	-1.74	1.04e-07
TUBB	tubulin beta class I	-1.74	8.76e-07
SH2B3	SH2B adaptor protein 3	-1.74	5.07e-06
TSPAN13	tetraspanin 13	-1.74	1.03e-05
OAF	out at first homolog	-1.74	0.000164
SPC24	SPC24, NDC80 kinetochore complex component	-1.73	1.21e-08
KIF2C	kinesin family member 2C	-1.73	4.33e-06
PLAUR	plasminogen activator, urokinase receptor	-1.73	1.96e-05
HMGB2	high mobility group box 2	-1.73	5.77e-05
LMO2	LIM domain only 2	-1.72	2.28e-07
KIF23	kinesin family member 23	-1.72	1.36e-06
TOX2	TOX high mobility group box family member 2	-1.72	6.87e-05
EXOSC9	exosome component 9	-1.71	3.13e-07
TOMM40	translocase of outer mitochondrial membrane 40	-1.71	6.66e-06
CDCP1	CUB domain containing protein 1	-1.7	1.21e-08
MCM5	minichromosome maintenance complex component 5	-1.7	4.58e-07
H2AFZ	H2A histone family member Z	-1.7	5.15e-06
IL33	interleukin 33	-1.7	7.26e-05
ITGA2	integrin subunit alpha 2	-1.69	8.92e-07
COL22A1	collagen type XXII alpha 1 chain	-1.69	1.68e-06
KIF20B	kinesin family member 20B	-1.69	1.75e-05
CHSY1	chondroitin sulfate synthase 1	-1.68	2.58e-07
PLK4	polo like kinase 4	-1.67	5.2e-08
RAD51AP1	RAD51 associated protein 1	-1.67	8.38e-07
TTK	TTK protein kinase	-1.67	8.04e-06
CCNF	cyclin F	-1.66	4.12e-07
CKS1B	CDC28 protein kinase regulatory subunit 1B	-1.66	4.91e-07
TPX2	TPX2, microtubule nucleation factor	-1.66	1.04e-06
CDCA8	cell division cycle associated 8	-1.65	6.63e-07
FJX1	four jointed box 1	-1.65	8.8e-07
UBE2T	ubiquitin conjugating enzyme E2 T	-1.65	4.1e-06
FAM171A1	family with sequence similarity 171 member A1	-1.65	9.49e-06
ADORA2B	adenosine A2b receptor	-1.64	4.6e-07
RANGAP1	Ran GTPase activating protein 1	-1.64	1.63e-06
HS3ST3A1	heparan sulfate-glucosamine 3-sulfotransferase 3A1	-1.63	1.4e-07
CYP1B1	cytochrome P450 family 1 subfamily B member 1	-1.63	0.000711
TACC3	transforming acidic coiled-coil containing protein 3	-1.62	5.92e-08
CYP2S1	cytochrome P450 family 2 subfamily S member 1	-1.61	3.3e-06
GRB14	growth factor receptor bound protein 14	-1.61	6.14e-06
NPTX1	neuronal pentraxin 1	-1.61	0.00271
PAICS	phosphoribosylaminoimidazole carboxylase; phosphoribosylaminoimidazolesuccinocarboxamide synthase	-1.6	4.31e-07
ZWINT	ZW10 interacting kinetochore protein	-1.6	5.8e-07
MTHFD1L	methylenetetrahydrofolate dehydrogenase (NADP+ dependent) 1-like	-1.6	1.65e-06
FABP5	fatty acid binding protein 5	-1.6	6.66e-06
FOXM1	forkhead box M1	-1.59	2.07e-08
GFPT2	glutamine-fructose-6-phosphate transaminase 2	-1.59	5.68e-06
PTPRF	protein tyrosine phosphatase, receptor type F	-1.59	1.36e-05
ID3	inhibitor of DNA binding 3, HLH protein	-1.58	2.75e-05
MELK	maternal embryonic leucine zipper kinase	-1.57	2.4e-06
MCM2	minichromosome maintenance complex component 2	-1.57	3.18e-06
CSE1L	chromosome segregation 1 like	-1.57	5.8e-06
ID2	inhibitor of DNA binding 2, HLH protein	-1.57	9.6e-06
ADIRF	adipogenesis regulatory factor	-1.57	1.36e-05
CCNB1	cyclin B1	-1.57	6.95e-05
OIP5	Opa interacting protein 5	-1.56	4.64e-07
HCFC1	host cell factor C1	-1.56	1.37e-05
POC1A	POC1 centriolar protein A	-1.56	1.89e-05
KPNA2	karyopherin subunit alpha 2	-1.55	4.03e-07
EBNA1BP2	EBNA1 binding protein 2	-1.55	3.13e-06
AXL	AXL receptor tyrosine kinase	-1.55	8.94e-06
HMOX1	heme oxygenase 1	-1.55	2.17e-05
CDK2	cyclin dependent kinase 2	-1.55	3.79e-05
ENG	endoglin	-1.55	0.00037
IL13RA2	interleukin 13 receptor subunit alpha 2	-1.54	1.57e-08
NUSAP1	nucleolar and spindle associated protein 1	-1.54	3.56e-07
DEPDC1	DEP domain containing 1	-1.54	7.58e-06
IRX3	iroquois homeobox 3	-1.54	1.09e-05
HMMR	hyaluronan mediated motility receptor	-1.53	2.84e-07
MDK	midkine (neurite growth-promoting factor 2)	-1.53	1.14e-06
CDCA4	cell division cycle associated 4	-1.53	1.74e-06
PLAT	plasminogen activator, tissue type	-1.53	9.81e-06
HNRNPA2B1	heterogeneous nuclear ribonucleoprotein A2/B1	-1.52	5.57e-06
RANBP1	RAN binding protein 1	-1.51	4.06e-07
ECT2	epithelial cell transforming 2	-1.51	0.000615
FGL2	fibrinogen like 2	-1.5	3.48e-06
MN1	MN1 proto-oncogene, transcriptional regulator	-1.49	3.92e-06
PPP1R14B	protein phosphatase 1 regulatory inhibitor subunit 14B	-1.49	4.09e-06
CRABP2	cellular retinoic acid binding protein 2	-1.48	2.5e-06
SPOCD1	SPOC domain containing 1	-1.48	2.18e-05
LOC146880	Rho GTPase activating protein 27 pseudogene	-1.46	3.59e-06
KHDRBS1	KH RNA binding domain containing, signal transduction associated 1	-1.46	1.65e-05
DDX39B	DEAD-box helicase 39B	-1.46	0.000106
POLA2	DNA polymerase alpha 2, accessory subunit	-1.45	1.63e-06
FST	follistatin	-1.45	4.81e-05
RRP7A	ribosomal RNA processing 7 homolog A	-1.44	3.07e-07
CENPN	centromere protein N	-1.44	4.59e-07
TEK	TEK receptor tyrosine kinase	-1.44	7.11e-07
CKS2	CDC28 protein kinase regulatory subunit 2	-1.44	1.49e-06
C19orf48	chromosome 19 open reading frame 48	-1.44	2e-05
FLNC	filamin C	-1.44	0.000973
HEY2	hes related family bHLH transcription factor with YRPW motif 2	-1.43	2.35e-07
FOSL1	FOS like 1, AP-1 transcription factor subunit	-1.43	2.75e-07
FGF2	fibroblast growth factor 2	-1.43	4.27e-06
PDE7B	phosphodiesterase 7B	-1.43	0.000524
NKD2	naked cuticle homolog 2	-1.42	4.32e-06
RAB27B	RAB27B, member RAS oncogene family	-1.42	6.77e-06
SDC1	syndecan 1	-1.42	1.61e-05
STIL	SCL/TAL1 interrupting locus	-1.42	3.37e-05
SPDL1	spindle apparatus coiled-coil protein 1	-1.41	1.34e-06
BDNF	brain derived neurotrophic factor	-1.41	3.31e-05
SAC3D1	SAC3 domain containing 1	-1.41	0.00137
HAS2	hyaluronan synthase 2	-1.4	0.000128
MARCKSL1	MARCKS like 1	-1.4	0.000706
MYO10	myosin X	-1.4	0.00255
FOXD1	forkhead box D1	-1.39	3.57e-06
SUV39H1	suppressor of variegation 3-9 homolog 1	-1.39	1.49e-05
ANPEP	alanyl aminopeptidase, membrane	-1.39	3.47e-05
SLC14A1	solute carrier family 14 member 1 (Kidd blood group)	-1.38	4.6e-07
IGFBP5	insulin like growth factor binding protein 5	-1.38	4.15e-06
SMS	spermine synthase	-1.38	5.8e-06
GK	glycerol kinase	-1.38	1.16e-05
SPHK1	sphingosine kinase 1	-1.38	4.88e-05
NDC80	NDC80, kinetochore complex component	-1.38	5.34e-05
NOP56	NOP56 ribonucleoprotein	-1.37	1.09e-06
SYNCRIP	synaptotagmin binding cytoplasmic RNA interacting protein	-1.37	9.75e-06
MMP10	matrix metallopeptidase 10	-1.37	3.09e-05
SPRY2	sprouty RTK signaling antagonist 2	-1.37	5.49e-05
CENPW	centromere protein W	-1.37	0.000452
NRIP3	nuclear receptor interacting protein 3	-1.36	1.02e-06
SOX17	SRY-box 17	-1.36	3.7e-05
POLR2A	RNA polymerase II subunit A	-1.36	4.98e-05
CENPE	centromere protein E	-1.36	0.0024
KIF14	kinesin family member 14	-1.35	1.4e-07
SPC25	SPC25, NDC80 kinetochore complex component	-1.35	3.88e-07
POLE2	DNA polymerase epsilon 2, accessory subunit	-1.35	1.63e-06
ACOT7	acyl-CoA thioesterase 7	-1.35	1.13e-05
CENPK	centromere protein K	-1.35	1.49e-05
SLC7A5	solute carrier family 7 member 5	-1.35	0.000101
ZNF185	zinc finger protein 185 (LIM domain)	-1.34	1.12e-07
DDX39A	DEAD-box helicase 39A	-1.34	4.4e-07
NCAPD2	non-SMC condensin I complex subunit D2	-1.34	2.07e-06
SMAD3	SMAD family member 3	-1.34	9.08e-06
CENPA	centromere protein A	-1.34	2.05e-05
CDH2	cadherin 2	-1.34	2.99e-05
ITPRIP	inositol 1,4,5-trisphosphate receptor interacting protein	-1.33	7.9e-07
H3F3C	H3 histone, family 3C	-1.33	4.45e-05
HSPD1	heat shock protein family D (Hsp60) member 1	-1.33	0.000277
MMP16	matrix metallopeptidase 16	-1.32	3.49e-06
EXO1	exonuclease 1	-1.32	6.64e-06
PLK1	polo like kinase 1	-1.31	3.35e-05
TMEM200A	transmembrane protein 200A	-1.31	0.000155
SNRNP70	small nuclear ribonucleoprotein U1 subunit 70	-1.3	4.09e-06
PSMD2	proteasome 26S subunit, non-ATPase 2	-1.3	2e-05
RPS7	ribosomal protein S7	-1.3	3.76e-05
SRSF1	serine and arginine rich splicing factor 1	-1.3	3.96e-05
PAQR4	progestin and adipoQ receptor family member 4	-1.3	0.000245
TIMELESS	timeless circadian clock	-1.29	4.89e-06
RHOBTB3	Rho related BTB domain containing 3	-1.29	1.17e-05
PA2G4	proliferation-associated 2G4	-1.29	0.000346
CLIC1	chloride intracellular channel 1	-1.29	0.000532
GINS3	GINS complex subunit 3	-1.28	3.2e-07
KIFC1	kinesin family member C1	-1.28	7.06e-07
SKA1	spindle and kinetochore associated complex subunit 1	-1.28	5.43e-06
RNASEH2A	ribonuclease H2 subunit A	-1.28	1.91e-05
SF3B4	splicing factor 3b subunit 4	-1.28	0.000919
LRP8	LDL receptor related protein 8	-1.27	4.92e-06
CYGB	cytoglobin	-1.27	6.4e-05
PUM3	pumilio RNA binding family member 3	-1.27	7.51e-05
HNRNPR	heterogeneous nuclear ribonucleoprotein R	-1.27	9.25e-05
CBFB	core-binding factor beta subunit	-1.27	0.000654
TROAP	trophinin associated protein	-1.26	4.6e-07
CDCA7	cell division cycle associated 7	-1.26	1.44e-06
GATAD2A	GATA zinc finger domain containing 2A	-1.26	1.91e-05
ADGRL2	adhesion G protein-coupled receptor L2	-1.26	5.01e-05
FANCG	Fanconi anemia complementation group G	-1.26	0.000101
DUSP12	dual specificity phosphatase 12	-1.26	0.000152
PRR11	proline rich 11	-1.25	2.91e-07
DTL	denticleless E3 ubiquitin protein ligase homolog	-1.25	2.65e-05
GMNN	geminin, DNA replication inhibitor	-1.25	0.000403
STC1	stanniocalcin 1	-1.25	0.00109
MCM6	minichromosome maintenance complex component 6	-1.24	8.86e-06
PRIM1	primase (DNA) subunit 1	-1.24	1.72e-05
CASP2	caspase 2	-1.24	3.34e-05
SERTAD2	SERTA domain containing 2	-1.24	5.9e-05
PTGES3	prostaglandin E synthase 3	-1.24	0.000766
DEK	DEK proto-oncogene	-1.24	0.00358
HPRT1	hypoxanthine phosphoribosyltransferase 1	-1.23	1.16e-06
HNRNPAB	heterogeneous nuclear ribonucleoprotein A/B	-1.23	2.84e-06
SPAG9	sperm associated antigen 9	-1.23	1.82e-05
LRIG1	leucine rich repeats and immunoglobulin like domains 1	-1.23	2.74e-05
FGFRL1	fibroblast growth factor receptor-like 1	-1.23	0.000226
CDC25B	cell division cycle 25B	-1.22	9.33e-06
FHL2	four and a half LIM domains 2	-1.22	0.000239
DDIAS	DNA damage induced apoptosis suppressor	-1.21	1.59e-06
DKC1	dyskerin pseudouridine synthase 1	-1.21	1.98e-06
POLQ	DNA polymerase theta	-1.21	2.84e-06
RBM14	RNA binding motif protein 14	-1.21	2.44e-05
MSX1	msh homeobox 1	-1.21	0.000112
TSPAN8	tetraspanin 8	-1.21	0.000322
CDT1	chromatin licensing and DNA replication factor 1	-1.21	0.000383
WNK4	WNK lysine deficient protein kinase 4	-1.2	9.3e-07
HNRNPM	heterogeneous nuclear ribonucleoprotein M	-1.2	4.74e-06
SH3KBP1	SH3 domain containing kinase binding protein 1	-1.2	5.28e-06
IL4R	interleukin 4 receptor	-1.2	6.12e-06
ZMIZ1	zinc finger MIZ-type containing 1	-1.2	5.49e-05
ORC6	origin recognition complex subunit 6	-1.19	6.64e-06
NRP1	neuropilin 1	-1.19	2.39e-05
ASF1B	anti-silencing function 1B histone chaperone	-1.18	5.8e-07
KIF4A	kinesin family member 4A	-1.18	2e-06
PARP1	poly(ADP-ribose) polymerase 1	-1.18	1.71e-05
ADAM19	ADAM metallopeptidase domain 19	-1.18	2.12e-05
PPP1R15A	protein phosphatase 1 regulatory subunit 15A	-1.18	3.42e-05
BTG3	BTG anti-proliferation factor 3	-1.18	6.87e-05
TSKU	tsukushi, small leucine rich proteoglycan	-1.17	0.000117
CCDC86	coiled-coil domain containing 86	-1.17	0.000826
RRM2	ribonucleotide reductase regulatory subunit M2	-1.16	2.43e-07
RFC4	replication factor C subunit 4	-1.16	2.68e-07
USP1	ubiquitin specific peptidase 1	-1.16	4.94e-06
TXNDC12	thioredoxin domain containing 12	-1.16	7.48e-06
CKAP2	cytoskeleton associated protein 2	-1.16	1.07e-05
FANCD2	Fanconi anemia complementation group D2	-1.16	3.2e-05
KNTC1	kinetochore associated 1	-1.15	6.66e-06
SHPK	sedoheptulokinase	-1.15	7.46e-06
RGS20	regulator of G-protein signaling 20	-1.15	1.49e-05
NUDT1	nudix hydrolase 1	-1.15	3.58e-05
SRRM2	serine/arginine repetitive matrix 2	-1.15	0.000408
NDRG4	NDRG family member 4	-1.14	2.52e-06
RPA3	replication protein A3	-1.14	6.51e-06
EXT1	exostosin glycosyltransferase 1	-1.14	7.31e-06
WDR4	WD repeat domain 4	-1.14	1.06e-05
CACYBP	calcyclin binding protein	-1.14	1.42e-05
SNRPA1	small nuclear ribonucleoprotein polypeptide A'	-1.14	1.43e-05
NME1	NME/NM23 nucleoside diphosphate kinase 1	-1.14	1.7e-05
LRR1	leucine rich repeat protein 1	-1.14	2.74e-05
FXYD5	FXYD domain containing ion transport regulator 5	-1.14	3.01e-05
LMNA	lamin A/C	-1.14	0.000154
HNRNPH1	heterogeneous nuclear ribonucleoprotein H1 (H)	-1.14	0.000648
EXOSC8	exosome component 8	-1.13	1.86e-06
FSCN1	fascin actin-bundling protein 1	-1.13	5.68e-06
SEMA3A	semaphorin 3A	-1.13	6.44e-06
RPS24	ribosomal protein S24	-1.13	6.28e-05
KCTD12	potassium channel tetramerization domain containing 12	-1.13	0.00013
CAMK2N1	calcium/calmodulin dependent protein kinase II inhibitor 1	-1.12	0.00041
RAC2	ras-related C3 botulinum toxin substrate 2 (rho family, small GTP binding protein Rac2)	-1.12	0.00164
CSTF3	cleavage stimulation factor subunit 3	-1.11	4.59e-07
ARHGDIA	Rho GDP dissociation inhibitor alpha	-1.11	5.3e-06
SAE1	SUMO1 activating enzyme subunit 1	-1.11	9.92e-06
CHAF1B	chromatin assembly factor 1 subunit B	-1.11	7.23e-05
BCL3	B-cell CLL/lymphoma 3	-1.11	0.00186
ATAD2	ATPase family, AAA domain containing 2	-1.1	7.34e-07
NCAPG2	non-SMC condensin II complex subunit G2	-1.1	1.1e-06
RFC3	replication factor C subunit 3	-1.1	1.31e-06
DDX21	DEAD-box helicase 21	-1.1	2.37e-06
FZD8	frizzled class receptor 8	-1.1	1.59e-05
HSPB11	heat shock protein family B (small) member 11	-1.1	2e-05
ARL6IP1	ADP ribosylation factor like GTPase 6 interacting protein 1	-1.1	4.16e-05
HDAC2	histone deacetylase 2	-1.1	0.00158
KLF4	Kruppel like factor 4	-1.1	0.0119
ENO2	enolase 2	-1.09	7.38e-06
LYPD1	LY6/PLAUR domain containing 1	-1.08	7.56e-06
SRRM1	serine and arginine repetitive matrix 1	-1.08	9.49e-06
METAP1	methionyl aminopeptidase 1	-1.08	5.83e-05
NUP62	nucleoporin 62	-1.08	0.000136
HNRNPUL1	heterogeneous nuclear ribonucleoprotein U like 1	-1.08	0.000138
ACTL6A	actin like 6A	-1.08	0.000262
CCT6P1	chaperonin containing TCP1 subunit 6 pseudogene 1	-1.08	0.00028
NPC1	NPC intracellular cholesterol transporter 1	-1.07	1.08e-06
MCM4	minichromosome maintenance complex component 4	-1.07	1.08e-06
EVA1A	eva-1 homolog A, regulator of programmed cell death	-1.07	5.21e-06
VARS	valyl-tRNA synthetase	-1.07	1.18e-05
SLC3A2	solute carrier family 3 member 2	-1.07	5.77e-05
ILF2	interleukin enhancer binding factor 2	-1.07	9.46e-05
GPR4	G protein-coupled receptor 4	-1.06	1.15e-07
NOL6	nucleolar protein 6	-1.06	1.1e-06
CDCA2	cell division cycle associated 2	-1.06	2.68e-06
EWSR1	EWS RNA binding protein 1	-1.06	3e-06
BRD9	bromodomain containing 9	-1.06	8.93e-06
SNRPF	small nuclear ribonucleoprotein polypeptide F	-1.06	9.88e-06
KDM2B	lysine demethylase 2B	-1.06	6.8e-05
NOL12	nucleolar protein 12	-1.06	7.21e-05
SIVA1	SIVA1 apoptosis inducing factor	-1.06	0.00023
SERPINB2	serpin family B member 2	-1.06	0.000361
HGS	hepatocyte growth factor-regulated tyrosine kinase substrate	-1.06	0.000478
CLDN11	claudin 11	-1.06	0.00126
EMG1	EMG1, N1-specific pseudouridine methyltransferase	-1.05	8.83e-06
FOXF1	forkhead box F1	-1.05	9.51e-06
NAP1L4	nucleosome assembly protein 1 like 4	-1.05	4.01e-05
CBX5	chromobox 5	-1.05	5.61e-05
DONSON	downstream neighbor of SON	-1.05	6.8e-05
NUP205	nucleoporin 205	-1.05	6.95e-05
TUBB6	tubulin beta 6 class V	-1.05	0.000112
U2AF2	U2 small nuclear RNA auxiliary factor 2	-1.05	0.000249
TPR	translocated promoter region, nuclear basket protein	-1.04	1.68e-05
PPRC1	peroxisome proliferator-activated receptor gamma, coactivator-related 1	-1.04	1.81e-05
CIRBP	cold inducible RNA binding protein	-1.04	0.00014
GBP4	guanylate binding protein 4	-1.03	2.34e-07
TPI1	triosephosphate isomerase 1	-1.03	2.87e-06
MMP3	matrix metallopeptidase 3	-1.03	5.42e-05
NUP188	nucleoporin 188	-1.03	5.99e-05
RGS2	regulator of G-protein signaling 2	-1.03	7.62e-05
HSP90AB1	heat shock protein 90 alpha family class B member 1	-1.03	0.000141
BUB3	BUB3, mitotic checkpoint protein	-1.03	0.000157
WBP11	WW domain binding protein 11	-1.03	0.000428
STRA13	stimulated by retinoic acid 13	-1.02	9.32e-06
CCND1	cyclin D1	-1.02	9.76e-06
PRPF8	pre-mRNA processing factor 8	-1.02	1.56e-05
SLC7A11	solute carrier family 7 member 11	-1.02	4.67e-05
TRA2B	transformer 2 beta homolog (Drosophila)	-1.02	0.000205
PKIA	protein kinase (cAMP-dependent, catalytic) inhibitor alpha	-1.02	0.000235
STIP1	stress induced phosphoprotein 1	-1.02	0.000449
RFWD3	ring finger and WD repeat domain 3	-1.02	0.000835
PSMD12	proteasome 26S subunit, non-ATPase 12	-1.02	0.00107
ATAD3A	ATPase family, AAA domain containing 3A	-1.01	5.2e-07
ETV5	ETS variant 5	-1.01	8.35e-07
RPL39L	ribosomal protein L39 like	-1.01	2.42e-06
PLCXD1	phosphatidylinositol specific phospholipase C X domain containing 1	-1.01	8.3e-06
KPNB1	karyopherin subunit beta 1	-1.01	0.000429
JUN	Jun proto-oncogene, AP-1 transcription factor subunit	-1.01	0.000737
MSANTD3	Myb/SANT DNA binding domain containing 3	-1.01	0.00182
C1QBP	complement C1q binding protein	-1.01	0.0038
FAM107A	family with sequence similarity 107 member A	1.01	4.28e-06
ENDOD1	endonuclease domain containing 1	1.01	7.33e-06
BRK1	BRICK1, SCAR/WAVE actin nucleating complex subunit	1.01	1.71e-05
GPD1L	glycerol-3-phosphate dehydrogenase 1-like	1.01	1.98e-05
IL10RB	interleukin 10 receptor subunit beta	1.01	3.49e-05
KIF13B	kinesin family member 13B	1.02	7.06e-07
ZFP90	ZFP90 zinc finger protein	1.02	6.95e-05
DHCR24	24-dehydrocholesterol reductase	1.02	7.9e-05
MSRB1	methionine sulfoxide reductase B1	1.02	9.5e-05
SNRPN	small nuclear ribonucleoprotein polypeptide N	1.02	9.86e-05
AHNAK2	AHNAK nucleoprotein 2	1.02	0.000183
CFLAR	CASP8 and FADD like apoptosis regulator	1.02	0.000383
SLC25A4	solute carrier family 25 member 4	1.03	1.08e-06
ABHD14A	abhydrolase domain containing 14A	1.03	2.84e-06
CDKN2B	cyclin dependent kinase inhibitor 2B	1.03	4.18e-06
CLN5	ceroid-lipofuscinosis, neuronal 5	1.03	1.25e-05
OLFML2A	olfactomedin like 2A	1.03	3.54e-05
SYTL4	synaptotagmin like 4	1.03	7.46e-05
C1orf122	chromosome 1 open reading frame 122	1.03	8.87e-05
DCUN1D3	defective in cullin neddylation 1 domain containing 3	1.03	0.000158
MORF4L2	mortality factor 4 like 2	1.03	0.000165
NPC2	NPC intracellular cholesterol transporter 2	1.03	0.000286
LAGE3	L antigen family member 3	1.03	0.000387
LTC4S	leukotriene C4 synthase	1.04	6.88e-07
DDR1	discoidin domain receptor tyrosine kinase 1	1.04	2.88e-06
TRAF5	TNF receptor associated factor 5	1.04	3.59e-06
GSTK1	glutathione S-transferase kappa 1	1.04	0.000101
C1RL	complement C1r subcomponent like	1.04	0.000101
LHFP	lipoma HMGIC fusion partner	1.04	0.000151
SEPTIN11	septin 11	1.04	0.000421
DNAJB9	DnaJ heat shock protein family (Hsp40) member B9	1.05	3.47e-07
TPD52L1	tumor protein D52-like 1	1.05	3.49e-06
FBN2	fibrillin 2	1.05	3.57e-06
TMEM97	transmembrane protein 97	1.05	4.88e-05
IRS2	insulin receptor substrate 2	1.05	9.13e-05
NDUFA13	NADH:ubiquinone oxidoreductase subunit A13	1.05	0.000118
CAMLG	calcium modulating ligand	1.05	0.000194
ACVR2A	activin A receptor type 2A	1.05	0.000678
TRIL	TLR4 interactor with leucine rich repeats	1.06	4.89e-06
TCTN1	tectonic family member 1	1.06	3.19e-05
C12orf57	chromosome 12 open reading frame 57	1.06	3.86e-05
ACSS2	acyl-CoA synthetase short-chain family member 2	1.06	7.12e-05
SUMF1	sulfatase modifying factor 1	1.06	0.000227
PRCP	prolylcarboxypeptidase	1.06	0.000553
CCND2	cyclin D2	1.07	1.92e-06
MALT1	MALT1 paracaspase	1.07	5.68e-06
SSBP2	single stranded DNA binding protein 2	1.07	1.47e-05
AK3	adenylate kinase 3	1.07	2.88e-05
ARSB	arylsulfatase B	1.07	0.000197
DSE	dermatan sulfate epimerase	1.07	0.000524
ST6GAL1	ST6 beta-galactoside alpha-2,6-sialyltransferase 1	1.08	2.7e-07
COPZ2	coatomer protein complex subunit zeta 2	1.08	2.02e-06
KLF9	Kruppel like factor 9	1.08	5.03e-06
WDR19	WD repeat domain 19	1.08	5.3e-06
PPARG	peroxisome proliferator activated receptor gamma	1.08	1.18e-05
RNASE4	ribonuclease A family member 4	1.08	1.37e-05
HSPB1	heat shock protein family B (small) member 1	1.08	0.000311
TPP1	tripeptidyl peptidase 1	1.08	0.000341
PALM	paralemmin	1.09	5.75e-07
FOXO3	forkhead box O3	1.09	4.47e-06
SPATA7	spermatogenesis associated 7	1.09	2.22e-05
BGN	biglycan	1.09	0.000392
SNAI2	snail family transcriptional repressor 2	1.09	0.000517
ISCU	iron-sulfur cluster assembly enzyme	1.1	4.57e-07
YPEL2	yippee like 2	1.1	3.98e-06
SRGN	serglycin	1.1	4.47e-06
PRRG1	proline rich and Gla domain 1	1.1	1.11e-05
FAM188B	family with sequence similarity 188 member B	1.1	1.94e-05
GLRB	glycine receptor beta	1.1	2.65e-05
HACD2	3-hydroxyacyl-CoA dehydratase 2	1.1	4.34e-05
GABARAPL1	GABA type A receptor associated protein like 1	1.1	6.66e-05
ARMCX3	armadillo repeat containing, X-linked 3	1.11	1.15e-07
GPC4	glypican 4	1.11	6.96e-07
ACKR2	atypical chemokine receptor 2	1.11	8.59e-07
HTATIP2	HIV-1 Tat interactive protein 2	1.11	2.6e-06
CPXM2	carboxypeptidase X, M14 family member 2	1.11	4.45e-05
CDKN2A	cyclin dependent kinase inhibitor 2A	1.11	0.0105
ROR2	receptor tyrosine kinase like orphan receptor 2	1.12	1.17e-06
MANBA	mannosidase beta	1.12	1.59e-06
TMEM140	transmembrane protein 140	1.12	2.76e-06
ADA	adenosine deaminase	1.12	5.36e-06
PLEKHF1	pleckstrin homology and FYVE domain containing 1	1.12	2.53e-05
TMEM150A	transmembrane protein 150A	1.12	2.58e-05
CST3	cystatin C	1.12	4.32e-05
ACOT13	acyl-CoA thioesterase 13	1.12	0.000205
CTIF	cap binding complex dependent translation initiation factor	1.13	1.02e-06
STX12	syntaxin 12	1.13	3.46e-06
CCDC80	coiled-coil domain containing 80	1.13	5.28e-06
CTSF	cathepsin F	1.13	8.1e-06
OBFC1	oligonucleotide/oligosaccharide binding fold containing 1	1.13	1.85e-05
SHROOM3	shroom family member 3	1.13	4.33e-05
CDC42EP5	CDC42 effector protein 5	1.13	7.97e-05
ITGAV	integrin subunit alpha V	1.13	0.00132
MXRA7	matrix remodeling associated 7	1.14	1.82e-05
HSD17B12	hydroxysteroid 17-beta dehydrogenase 12	1.14	5.39e-05
C6orf48	chromosome 6 open reading frame 48	1.14	5.99e-05
PIK3R1	phosphoinositide-3-kinase regulatory subunit 1	1.14	7.18e-05
TST	thiosulfate sulfurtransferase	1.14	0.000112
FOXN3	forkhead box N3	1.14	0.000621
ANGPTL2	angiopoietin like 2	1.14	0.00239
SEPTIN4	septin 4	1.15	6.9e-07
RHOD	ras homolog family member D	1.15	1.92e-06
COBLL1	cordon-bleu WH2 repeat protein like 1	1.15	2.5e-06
LMOD1	leiomodin 1	1.15	4.48e-06
FAM198B	family with sequence similarity 198 member B	1.15	1.05e-05
PMP22	peripheral myelin protein 22	1.15	3.88e-05
TSPAN31	tetraspanin 31	1.15	0.000235
SLC25A23	solute carrier family 25 member 23	1.15	0.000409
TCEAL8	transcription elongation factor A like 8	1.16	7.01e-07
SLC15A3	solute carrier family 15 member 3	1.16	1.89e-06
PCYOX1	prenylcysteine oxidase 1	1.16	6.23e-06
CYB5D2	cytochrome b5 domain containing 2	1.16	1.11e-05
HS1BP3	HCLS1 binding protein 3	1.16	6.14e-05
THY1	Thy-1 cell surface antigen	1.16	8.16e-05
DBT	dihydrolipoamide branched chain transacylase E2	1.16	0.000127
SLC41A3	solute carrier family 41 member 3	1.16	0.000233
RABAC1	Rab acceptor 1	1.16	0.000286
ACSL5	acyl-CoA synthetase long-chain family member 5	1.17	5.4e-07
PKP2	plakophilin 2	1.17	5.65e-07
ABCA8	ATP binding cassette subfamily A member 8	1.17	1.08e-06
UCHL1	ubiquitin C-terminal hydrolase L1	1.17	4.09e-06
CDKN1C	cyclin dependent kinase inhibitor 1C	1.17	6.05e-06
CYB5A	cytochrome b5 type A	1.17	1.37e-05
PHPT1	phosphohistidine phosphatase 1	1.17	8e-05
SNORD13	small nucleolar RNA, C/D box 13	1.18	7.38e-06
ABLIM1	actin binding LIM protein 1	1.18	2.16e-05
PCMTD1	protein-L-isoaspartate (D-aspartate) O-methyltransferase domain containing 1	1.18	9.5e-05
FZD2	frizzled class receptor 2	1.18	0.000304
AKAP13	A-kinase anchoring protein 13	1.18	0.00156
CNN2	calponin 2	1.19	3.97e-05
GDE1	glycerophosphodiester phosphodiesterase 1	1.19	4.02e-05
SLC2A10	solute carrier family 2 member 10	1.2	3.11e-05
TMEM204	transmembrane protein 204	1.2	0.000177
ARHGDIB	Rho GDP dissociation inhibitor beta	1.21	3.95e-06
TPST2	tyrosylprotein sulfotransferase 2	1.21	1.28e-05
IL1RL1	interleukin 1 receptor like 1	1.22	7.06e-07
VGLL3	vestigial like family member 3	1.22	4.66e-06
OSBPL10	oxysterol binding protein like 10	1.22	9.92e-06
EDNRB	endothelin receptor type B	1.22	1.37e-05
CNIH1	cornichon family AMPA receptor auxiliary protein 1	1.22	0.000368
CALD1	caldesmon 1	1.22	0.0004
PLPP1	phospholipid phosphatase 1	1.23	9.71e-07
UPP1	uridine phosphorylase 1	1.23	2.29e-05
HEBP1	heme binding protein 1	1.23	8.87e-05
GSTM1	glutathione S-transferase mu 1	1.24	2.68e-06
CTDSPL	CTD small phosphatase like	1.25	1.4e-07
HIST1H2BD	histone cluster 1, H2bd	1.25	1.76e-07
JAM2	junctional adhesion molecule 2	1.25	2.35e-07
TRAK2	trafficking kinesin protein 2	1.25	2.61e-07
HNMT	histamine N-methyltransferase	1.25	2.39e-06
FOS	Fos proto-oncogene, AP-1 transcription factor subunit	1.25	9.08e-06
HCFC1R1	host cell factor C1 regulator 1	1.25	0.000142
CYB561A3	cytochrome b561 family member A3	1.25	0.000426
ECH1	enoyl-CoA hydratase 1	1.26	6.24e-07
TRIM22	tripartite motif containing 22	1.26	5.28e-06
OPN3	opsin 3	1.26	1.17e-05
TPM2	tropomyosin 2 (beta)	1.26	1.65e-05
DDAH1	dimethylarginine dimethylaminohydrolase 1	1.26	0.000302
RNF217	ring finger protein 217	1.27	4.44e-07
PLEKHA1	pleckstrin homology domain containing A1	1.27	9.66e-07
CERS6	ceramide synthase 6	1.27	2.64e-06
PDPN	podoplanin	1.27	7.37e-06
IRAK3	interleukin 1 receptor associated kinase 3	1.27	8.91e-06
PLTP	phospholipid transfer protein	1.27	2.18e-05
SLC35F5	solute carrier family 35 member F5	1.27	3.06e-05
IGFBP2	insulin like growth factor binding protein 2	1.27	3.37e-05
YPEL3	yippee like 3	1.28	2.04e-07
GSTM2	glutathione S-transferase mu 2 (muscle)	1.28	1.44e-06
COMMD6	COMM domain containing 6	1.28	2.75e-06
ELN	elastin	1.28	1.75e-05
SEC14L1	SEC14 like lipid binding 1	1.28	2.45e-05
SC5D	sterol-C5-desaturase	1.28	5.79e-05
MTSS1	metastasis suppressor 1	1.29	3.28e-07
NEO1	neogenin 1	1.29	4.12e-07
CPQ	carboxypeptidase Q	1.29	5.75e-07
UBE2E2	ubiquitin conjugating enzyme E2 E2	1.29	2.84e-06
TNFRSF14	TNF receptor superfamily member 14	1.29	7.38e-06
CCDC146	coiled-coil domain containing 146	1.29	9.48e-06
HTR2B	5-hydroxytryptamine receptor 2B	1.3	7.53e-07
CEBPB	CCAAT/enhancer binding protein beta	1.3	1.1e-06
GBP2	guanylate binding protein 2	1.31	5.8e-06
TACSTD2	tumor-associated calcium signal transducer 2	1.32	8.33e-07
IFITM2	interferon induced transmembrane protein 2	1.32	6.52e-05
HLA-E	major histocompatibility complex, class I, E	1.33	2.05e-06
HLA-DMA	major histocompatibility complex, class II, DM alpha	1.33	6.1e-06
TCEAL9	transcription elongation factor A like 9	1.33	6.87e-05
PDCD4	programmed cell death 4 (neoplastic transformation inhibitor)	1.33	0.000222
CYB5R1	cytochrome b5 reductase 1	1.34	2.56e-07
LAMP2	lysosomal associated membrane protein 2	1.34	6.16e-06
SMPDL3A	sphingomyelin phosphodiesterase acid like 3A	1.34	1.22e-05
SAT1	spermidine/spermine N1-acetyltransferase 1	1.35	6.69e-06
SELM	selenoprotein M	1.35	0.000534
YPEL5	yippee like 5	1.36	6.77e-05
HACD1	3-hydroxyacyl-CoA dehydratase 1	1.36	0.000121
ALOX5AP	arachidonate 5-lipoxygenase activating protein	1.37	2.88e-07
CBS	cystathionine-beta-synthase	1.37	1.31e-05
TSPAN6	tetraspanin 6	1.37	1.36e-05
LEPROT	leptin receptor overlapping transcript	1.37	1.6e-05
NNMT	nicotinamide N-methyltransferase	1.37	2.46e-05
MYO1D	myosin ID	1.38	1.08e-05
KRT7	keratin 7	1.38	1.75e-05
WISP1	WNT1 inducible signaling pathway protein 1	1.38	4.48e-05
JAZF1	JAZF zinc finger 1	1.39	4.44e-07
CROT	carnitine O-octanoyltransferase	1.39	5.5e-05
RRAS	related RAS viral (r-ras) oncogene homolog	1.39	0.000101
LIMS2	LIM zinc finger domain containing 2	1.39	0.000333
IL18R1	interleukin 18 receptor 1	1.4	2.07e-06
SERPING1	serpin family G member 1	1.4	3.55e-06
MGST1	microsomal glutathione S-transferase 1	1.4	4.89e-06
GCNT1	glucosaminyl (N-acetyl) transferase 1, core 2	1.41	1.2e-07
CHN2	chimerin 2	1.41	4.6e-07
MAN1C1	mannosidase alpha class 1C member 1	1.41	2.42e-06
ZNF277	zinc finger protein 277	1.41	7.38e-06
MSRB3	methionine sulfoxide reductase B3	1.42	1.6e-06
CCPG1	cell cycle progression 1	1.42	1.71e-06
ELL2	elongation factor for RNA polymerase II 2	1.42	5.84e-06
PIK3IP1	phosphoinositide-3-kinase interacting protein 1	1.42	6.65e-05
MAP1LC3A	microtubule associated protein 1 light chain 3 alpha	1.42	7.23e-05
ANKRD33	ankyrin repeat domain 33	1.42	0.000174
ANKRD6	ankyrin repeat domain 6	1.43	1.73e-06
TMEM45A	transmembrane protein 45A	1.43	4.81e-06
COL8A2	collagen type VIII alpha 2 chain	1.43	5.58e-06
MT1M	metallothionein 1M	1.43	7.45e-05
THBS1	thrombospondin 1	1.43	0.00108
ZMAT3	zinc finger matrin-type 3	1.44	3.75e-08
CALCOCO2	calcium binding and coiled-coil domain 2	1.45	5.23e-07
GLRX	glutaredoxin	1.45	1.74e-05
IFITM3	interferon induced transmembrane protein 3	1.45	0.000347
ALCAM	activated leukocyte cell adhesion molecule	1.46	0.00121
ANG	angiogenin	1.47	2.58e-07
CFD	complement factor D	1.47	4.31e-07
ZNF106	zinc finger protein 106	1.47	9.34e-07
MID1	midline 1	1.47	2.18e-05
ITPR1	inositol 1,4,5-trisphosphate receptor type 1	1.47	8.06e-05
KLHL24	kelch like family member 24	1.48	2.06e-06
RHOQ	ras homolog family member Q	1.48	2.17e-06
ALAD	aminolevulinate dehydratase	1.48	5.28e-06
HIST2H2AC	histone cluster 2, H2ac	1.48	5.99e-06
CPED1	cadherin like and PC-esterase domain containing 1	1.49	1.14e-06
ENTPD1	ectonucleoside triphosphate diphosphohydrolase 1	1.51	1.57e-08
TMEM47	transmembrane protein 47	1.51	4.81e-05
STARD5	StAR related lipid transfer domain containing 5	1.52	2.71e-07
COL4A2	collagen type IV alpha 2 chain	1.52	2.5e-06
NINJ2	ninjurin 2	1.52	3.35e-06
HPS5	HPS5, biogenesis of lysosomal organelles complex 2 subunit 2	1.53	3.17e-06
ITGA1	integrin subunit alpha 1	1.53	4.42e-06
IFNGR1	interferon gamma receptor 1	1.53	5.85e-06
SORBS2	sorbin and SH3 domain containing 2	1.55	1.94e-07
DBNDD2	dysbindin domain containing 2	1.55	5.4e-07
PGM1	phosphoglucomutase 1	1.55	1.12e-06
RAMP1	receptor activity modifying protein 1	1.55	1.55e-05
SERF2	small EDRK-rich factor 2	1.55	0.000121
FSTL3	follistatin like 3	1.55	0.000191
GSTT1	glutathione S-transferase theta 1	1.57	9.92e-07
BEX3	brain expressed X-linked 3	1.57	3.41e-05
HIST1H2AC	histone cluster 1, H2ac	1.58	5.69e-08
GADD45A	growth arrest and DNA damage inducible alpha	1.58	6.25e-07
CITED2	Cbp/p300 interacting transactivator with Glu/Asp rich carboxy-terminal domain 2	1.58	3.27e-05
RFTN2	raftlin family member 2	1.59	4.44e-07
S100A13	S100 calcium binding protein A13	1.59	1.93e-06
CIDEC	cell death inducing DFFA like effector c	1.59	8.91e-06
LBH	limb bud and heart development	1.59	3.18e-05
HSPB6	heat shock protein family B (small) member 6	1.59	0.00304
HSPB2	heat shock protein family B (small) member 2	1.6	1.09e-07
ARL6IP5	ADP ribosylation factor like GTPase 6 interacting protein 5	1.6	3.63e-06
MLPH	melanophilin	1.6	9.49e-06
DDIT4	DNA damage inducible transcript 4	1.61	6.16e-06
PRKD1	protein kinase D1	1.61	6.64e-06
STAT2	signal transducer and activator of transcription 2	1.61	8.04e-06
CRISPLD2	cysteine rich secretory protein LCCL domain containing 2	1.61	2.98e-05
MFGE8	milk fat globule-EGF factor 8 protein	1.61	0.000552
N4BP2L2	NEDD4 binding protein 2 like 2	1.62	3.71e-07
SSPN	sarcospan	1.62	1.36e-06
PRSS23	protease, serine 23	1.62	1.28e-05
RABGAP1	RAB GTPase activating protein 1	1.62	5.77e-05
AXIN2	axin 2	1.63	4.4e-07
NOX4	NADPH oxidase 4	1.64	8.59e-07
NUAK1	NUAK family kinase 1	1.64	9.86e-07
DKK3	dickkopf WNT signaling pathway inhibitor 3	1.64	1.32e-06
IFI44L	interferon induced protein 44 like	1.64	3.2e-06
ADRA1B	adrenoceptor alpha 1B	1.64	3.56e-06
CTSD	cathepsin D	1.64	1.25e-05
FAXDC2	fatty acid hydroxylase domain containing 2	1.66	1.29e-07
LAMA2	laminin subunit alpha 2	1.66	8.14e-06
CSRP2	cysteine and glycine rich protein 2	1.66	1e-05
TCEAL1	transcription elongation factor A like 1	1.66	1.49e-05
ANGPT1	angiopoietin 1	1.67	2.88e-07
CREG1	cellular repressor of E1A stimulated genes 1	1.67	0.000367
PLA2G16	phospholipase A2 group XVI	1.68	1.31e-06
SLMAP	sarcolemma associated protein	1.68	3.49e-05
ROR1	receptor tyrosine kinase like orphan receptor 1	1.69	2.28e-07
C1S	complement component 1, s subcomponent	1.69	9.33e-06
MAMDC2	MAM domain containing 2	1.7	3.04e-07
S100A4	S100 calcium binding protein A4	1.71	1.82e-07
KCNK6	potassium two pore domain channel subfamily K member 6	1.71	2.6e-06
SOD2	superoxide dismutase 2, mitochondrial	1.72	1.42e-06
CD302	CD302 molecule	1.73	1.76e-06
SCPEP1	serine carboxypeptidase 1	1.73	6.16e-06
ADH1B	alcohol dehydrogenase 1B (class I), beta polypeptide	1.74	2.04e-07
PLSCR4	phospholipid scramblase 4	1.75	4.89e-06
H2AFJ	H2A histone family member J	1.75	2.69e-05
TSPAN9	tetraspanin 9	1.76	8.39e-07
ARHGEF6	Rac/Cdc42 guanine nucleotide exchange factor 6	1.77	3.54e-07
ZBTB16	zinc finger and BTB domain containing 16	1.78	4.97e-08
TMTC1	transmembrane and tetratricopeptide repeat containing 1	1.78	1.37e-06
GSTM3	glutathione S-transferase mu 3	1.78	1.59e-06
CTSH	cathepsin H	1.79	4.6e-07
MGARP	mitochondria localized glutamic acid rich protein	1.79	1.25e-06
SRPX2	sushi repeat containing protein, X-linked 2	1.79	6.87e-05
TMEM159	transmembrane protein 159	1.8	1.12e-08
RARRES2	retinoic acid receptor responder 2	1.8	1.49e-05
PPIC	peptidylprolyl isomerase C	1.81	2.33e-06
NEDD9	neural precursor cell expressed, developmentally down-regulated 9	1.82	1.01e-06
AOX1	aldehyde oxidase 1	1.83	4.61e-08
ADARB1	adenosine deaminase, RNA specific B1	1.83	6.69e-08
GCHFR	GTP cyclohydrolase I feedback regulator	1.83	1.1e-06
SVEP1	sushi, von Willebrand factor type A, EGF and pentraxin domain containing 1	1.83	2.43e-06
ALDH1B1	aldehyde dehydrogenase 1 family member B1	1.85	8.97e-07
PTN	pleiotrophin	1.85	6.64e-06
FMOD	fibromodulin	1.85	1.85e-05
SGCG	sarcoglycan gamma	1.86	3.93e-08
RAP2A	RAP2A, member of RAS oncogene family	1.86	1.22e-07
SPINT2	serine peptidase inhibitor, Kunitz type 2	1.86	2.68e-07
TCEAL3	transcription elongation factor A like 3	1.86	7.54e-07
PALLD	palladin, cytoskeletal associated protein	1.88	3.4e-07
HIST1H4H	histone cluster 1, H4h	1.88	7.45e-07
ASS1	argininosuccinate synthase 1	1.89	2.96e-08
ITGA11	integrin subunit alpha 11	1.89	6.85e-05
TNFRSF11B	TNF receptor superfamily member 11b	1.9	1.13e-08
IFI6	interferon alpha inducible protein 6	1.9	1.15e-05
OXTR	oxytocin receptor	1.9	1.83e-05
PODN	podocan	1.91	1.44e-06
MXD4	MAX dimerization protein 4	1.91	1.55e-06
GPNMB	glycoprotein nmb	1.91	4.21e-06
IFITM1	interferon induced transmembrane protein 1	1.92	0.000117
AKR1C3	aldo-keto reductase family 1, member C3	1.94	6.66e-08
PLIN2	perilipin 2	1.95	5.2e-07
SH3BGRL	SH3 domain binding glutamate rich protein like	1.95	1.07e-05
ERRFI1	ERBB receptor feedback inhibitor 1	1.97	6.34e-06
GREM1	gremlin 1, DAN family BMP antagonist	1.97	1.64e-05
SEPP1	selenoprotein P, plasma, 1	1.98	3.59e-08
RARRES3	retinoic acid receptor responder 3	1.98	2.95e-07
ADM	adrenomedullin	1.98	5.8e-07
SERPINF1	serpin family F member 1	1.98	3.02e-06
SERPINA5	serpin family A member 5	1.99	2.58e-07
PLAC9	placenta specific 9	2.01	1.21e-08
RPS6KA2	ribosomal protein S6 kinase A2	2.01	8.97e-08
COL11A1	collagen type XI alpha 1 chain	2.01	3.51e-05
OPTN	optineurin	2.02	1.22e-06
CYBRD1	cytochrome b reductase 1	2.03	6.62e-07
HTRA1	HtrA serine peptidase 1	2.04	3.58e-05
A2M	alpha-2-macroglobulin	2.08	5.45e-07
ITLN1	intelectin 1	2.08	1.74e-06
HIST2H2AA3	histone cluster 2, H2aa3	2.09	1.01e-06
FHL1	four and a half LIM domains 1	2.11	1.01e-06
CFH	complement factor H	2.12	9.59e-08
SUGCT	succinyl-CoA:glutarate-CoA transferase	2.12	6.17e-06
SLC2A5	solute carrier family 2 member 5	2.13	2.46e-07
GSN	gelsolin	2.13	1.76e-06
TIMP4	TIMP metallopeptidase inhibitor 4	2.16	1.46e-08
OLFML3	olfactomedin like 3	2.16	1.43e-06
SLC46A3	solute carrier family 46 member 3	2.16	1.65e-06
ANKRD1	ankyrin repeat domain 1	2.17	3.26e-06
PRUNE2	prune homolog 2	2.19	1.46e-08
FAM46B	family with sequence similarity 46 member B	2.19	3.14e-08
METTL7A	methyltransferase like 7A	2.19	0.000189
SFRP4	secreted frizzled related protein 4	2.2	1.79e-07
GRAMD3	GRAM domain containing 3	2.2	1.13e-06
MT1X	metallothionein 1X	2.21	2.56e-06
SUSD2	sushi domain containing 2	2.22	5.59e-08
EPAS1	endothelial PAS domain protein 1	2.23	4.6e-07
EFHD1	EF-hand domain family member D1	2.24	1.1e-06
APOE	apolipoprotein E	2.25	9.85e-09
ECM2	extracellular matrix protein 2	2.25	1.07e-07
MYH11	myosin heavy chain 11	2.26	6.17e-07
C7	complement component 7	2.27	1.78e-07
TCEAL4	transcription elongation factor A like 4	2.28	1.46e-08
FBLN5	fibulin 5	2.28	1.99e-08
TAGLN	transgelin	2.29	1.21e-06
CTHRC1	collagen triple helix repeat containing 1	2.29	1.46e-06
DEPTOR	DEP domain containing MTOR-interacting protein	2.3	1.5e-08
OMD	osteomodulin	2.3	7.83e-08
POSTN	periostin	2.3	3.47e-07
TEX2	testis expressed 2	2.3	4.6e-07
C6	complement component 6	2.31	6.63e-08
CNN1	calponin 1	2.32	1.88e-06
SPARCL1	SPARC like 1	2.35	4.27e-08
GPX3	glutathione peroxidase 3	2.36	2.31e-06
NPTX2	neuronal pentraxin 2	2.37	7.8e-08
PDE1A	phosphodiesterase 1A	2.38	2.96e-08
DCN	decorin	2.38	2.88e-07
GAS1	growth arrest specific 1	2.4	1.04e-07
ALPK2	alpha kinase 2	2.41	6.66e-08
PDGFRB	platelet derived growth factor receptor beta	2.42	9.49e-07
NEXN	nexilin F-actin binding protein	2.45	4.51e-06
RASL11B	RAS like family 11 member B	2.47	2.16e-08
FOXO1	forkhead box O1	2.48	1.28e-07
KCNT2	potassium sodium-activated channel subfamily T member 2	2.51	7.97e-08
HSPA2	heat shock protein family A (Hsp70) member 2	2.52	7.63e-07
COMP	cartilage oligomeric matrix protein	2.53	1.64e-07
CRYAB	crystallin alpha B	2.53	1.36e-06
CLIC3	chloride intracellular channel 3	2.55	2.8e-07
QPRT	quinolinate phosphoribosyltransferase	2.56	2.84e-07
MMP23B	matrix metallopeptidase 23B	2.56	4.6e-07
DUSP23	dual specificity phosphatase 23	2.58	3.68e-08
RPS29	ribosomal protein S29	2.61	2.25e-08
C1orf198	chromosome 1 open reading frame 198	2.61	3.28e-07
MME	membrane metallo-endopeptidase	2.61	1.13e-06
CD14	CD14 molecule	2.63	2.72e-07
CORIN	corin, serine peptidase	2.63	1.08e-06
SORT1	sortilin 1	2.67	1.8e-09
FKBP5	FK506 binding protein 5	2.67	5.16e-07
MYLK	myosin light chain kinase	2.67	6.96e-07
ACTA2	actin, alpha 2, smooth muscle, aorta	2.68	2.8e-07
MYL9	myosin light chain 9	2.7	1.39e-07
DPT	dermatopontin	2.71	5.79e-09
RPRML	reprimo like	2.72	5.15e-09
HIST1H2BK	histone cluster 1, H2bk	2.73	7.6e-08
RAB11FIP1	RAB11 family interacting protein 1	2.74	9.15e-09
LMO3	LIM domain only 3	2.74	4.81e-07
PLCXD3	phosphatidylinositol specific phospholipase C X domain containing 3	2.75	1.46e-08
COL4A1	collagen type IV alpha 1 chain	2.78	9.66e-07
HIST1H1C	histone cluster 1, H1c	2.8	3.51e-07
ITLN2	intelectin 2	2.81	1.11e-07
CD34	CD34 molecule	2.82	1.99e-08
LMCD1	LIM and cysteine rich domains 1	2.85	6.86e-09
HSD11B1	hydroxysteroid 11-beta dehydrogenase 1	2.89	7.42e-07
NUPR1	nuclear protein 1, transcriptional regulator	2.9	3.16e-09
C5orf46	chromosome 5 open reading frame 46	2.9	3.53e-07
C1QTNF5	C1q and tumor necrosis factor related protein 5	2.91	1.46e-08
GLS	glutaminase	2.92	5.79e-09
TMEM119	transmembrane protein 119	2.92	3.75e-08
MFAP4	microfibrillar associated protein 4	2.94	2.68e-06
FBLN1	fibulin 1	2.95	6.98e-09
TSC22D3	TSC22 domain family member 3	2.99	7.32e-08
FNDC1	fibronectin type III domain containing 1	3.02	1.57e-08
ATP8B4	ATPase phospholipid transporting 8B4 (putative)	3.03	3.16e-09
COX7A1	cytochrome c oxidase subunit 7A1	3.09	2.16e-07
PDGFD	platelet derived growth factor D	3.11	3.16e-09
C10orf10	chromosome 10 open reading frame 10	3.14	4.95e-08
TXNIP	thioredoxin interacting protein	3.23	2.96e-08
GAS6	growth arrest specific 6	3.23	5.78e-08
C11orf96	chromosome 11 open reading frame 96	3.27	1e-08
ADH1A	alcohol dehydrogenase 1A (class I), alpha polypeptide	3.42	9.73e-09
SAA1	serum amyloid A1	3.43	7.05e-08
BEX1	brain expressed X-linked 1	3.53	5.79e-09
COL8A1	collagen type VIII alpha 1 chain	3.54	1.76e-08
STMN2	stathmin 2	3.56	1.59e-09
PTGDS	prostaglandin D2 synthase	3.56	1.8e-09
SERPINA3	serpin family A member 3	3.68	1.59e-08
CTSK	cathepsin K	3.7	1.88e-08
PROS1	protein S (alpha)	3.72	5.87e-08
FBXO32	F-box protein 32	3.76	5.79e-09
LUM	lumican	3.89	2.28e-08
SLC40A1	solute carrier family 40 member 1	3.96	3e-08
PPP1R14A	protein phosphatase 1 regulatory inhibitor subunit 14A	4.14	9.93e-08
INMT	indolethylamine N-methyltransferase	4.29	1.54e-08
MGP	matrix Gla protein	4.42	1.59e-09
LEP	leptin	4.42	3.22e-08
RGCC	regulator of cell cycle	4.49	1.3e-08
APOD	apolipoprotein D	4.7	1.13e-07
MAOA	monoamine oxidase A	4.86	3.16e-09
ACTG2	actin, gamma 2, smooth muscle, enteric	4.86	9.85e-09

## Sheet: 25VS0-adj.p.value<0.0-|logFC|>1
List of DEGs in CVSMCs cultured for 25 days in calcified medium
Gene.symbol	Gene name	logFC	adj.P.Val
CXCL8	C-X-C motif chemokine ligand 8	-5.26074	3.27e-08
SOST	sclerostin	-4.55565	2.24e-08
ANXA10	annexin A10	-4.22698	1.01e-06
ALDH1A3	aldehyde dehydrogenase 1 family member A3	-3.96671	2.46e-08
DIRAS3	DIRAS family GTPase 3	-3.89432	6.81e-06
IL1B	interleukin 1 beta	-3.79536	1.7e-06
TGFBI	transforming growth factor beta induced	-3.68667	5.07e-07
MMP1	matrix metallopeptidase 1	-3.58796	6.39e-05
CCL2	C-C motif chemokine ligand 2	-3.36197	1.49e-06
CDC20	cell division cycle 20	-3.32402	1.37e-06
PLAU	plasminogen activator, urokinase	-3.08027	2.61e-07
UBE2C	ubiquitin conjugating enzyme E2 C	-3.05419	8.74e-08
CDH6	cadherin 6	-3.04467	2.93e-08
CXCL1	C-X-C motif chemokine ligand 1	-2.96024	3.52e-05
UHRF1	ubiquitin like with PHD and ring finger domains 1	-2.94878	8.23e-08
MCM7	minichromosome maintenance complex component 7	-2.9431	1.59e-06
COLEC12	collectin subfamily member 12	-2.93833	2.43e-07
CRIP1	cysteine rich protein 1	-2.85124	1.42e-07
LPXN	leupaxin	-2.8283	3.79e-07
TUBB3	tubulin beta 3 class III	-2.82221	2.16e-06
TYMS	thymidylate synthetase	-2.81326	3.53e-05
PTTG3P	pituitary tumor-transforming 3, pseudogene	-2.7479	5.51e-06
IGFBP6	insulin like growth factor binding protein 6	-2.72157	1.3e-06
PRSS3	protease, serine 3	-2.68389	1.21e-06
TOP2A	topoisomerase (DNA) II alpha	-2.67993	1.02e-06
PTTG1	pituitary tumor-transforming 1	-2.66606	1.25e-06
PRRX2	paired related homeobox 2	-2.65739	3.73e-06
LAMA5	laminin subunit alpha 5	-2.65247	6.69e-07
CXCL6	C-X-C motif chemokine ligand 6	-2.62064	1.1e-05
HMGA1	high mobility group AT-hook 1	-2.62039	2.47e-07
PRC1	protein regulator of cytokinesis 1	-2.61646	1.1e-07
DHRS3	dehydrogenase/reductase 3	-2.56734	9.18e-06
CCNA2	cyclin A2	-2.54476	1.38e-07
PHLDA1	pleckstrin homology like domain family A member 1	-2.50667	2.97e-05
KIAA0101	KIAA0101	-2.49748	3.65e-06
COL13A1	collagen type XIII alpha 1 chain	-2.48503	2.71e-07
GINS2	GINS complex subunit 2	-2.482	3.34e-07
HIST1H4C	histone cluster 1, H4c	-2.41052	1.32e-05
PTGIS	prostaglandin I2 (prostacyclin) synthase	-2.39606	4.34e-05
LXN	latexin	-2.39196	2.34e-05
NTM	neurotrimin	-2.35248	1.87e-07
ID1	inhibitor of DNA binding 1, HLH protein	-2.3164	0.000116
CCNB2	cyclin B2	-2.31614	2.15e-06
CDC45	cell division cycle 45	-2.30021	5.02e-07
CDCA5	cell division cycle associated 5	-2.28551	1.49e-06
PODXL	podocalyxin like	-2.27185	1.8e-07
TM4SF1	transmembrane 4 L six family member 1	-2.25869	2.61e-07
NCAPG	non-SMC condensin I complex subunit G	-2.25645	4.96e-06
CEP55	centrosomal protein 55	-2.25536	3.41e-07
DDX10	DEAD-box helicase 10	-2.22055	5.15e-07
AURKA	aurora kinase A	-2.21093	6.72e-07
SLC7A1	solute carrier family 7 member 1	-2.20697	4.01e-06
TRIP13	thyroid hormone receptor interactor 13	-2.20081	3.15e-07
BMP2	bone morphogenetic protein 2	-2.195	5.41e-06
MAD2L1	MAD2 mitotic arrest deficient-like 1 (yeast)	-2.17236	0.000175
TK1	thymidine kinase 1	-2.17137	1.24e-05
PRDM8	PR/SET domain 8	-2.15901	2.87e-05
KIF11	kinesin family member 11	-2.15604	1.17e-05
PFKP	phosphofructokinase, platelet	-2.13496	4.9e-07
KIF20A	kinesin family member 20A	-2.09694	3.44e-07
ASPM	abnormal spindle microtubule assembly	-2.07672	3.85e-07
MALL	mal, T-cell differentiation protein like	-2.07386	3.12e-05
CENPM	centromere protein M	-2.06526	8.88e-06
GABBR2	gamma-aminobutyric acid type B receptor subunit 2	-2.05789	6.83e-08
BDKRB1	bradykinin receptor B1	-2.04731	1.29e-06
ODC1	ornithine decarboxylase 1	-2.03269	2.1e-07
NDUFA4L2	NDUFA4, mitochondrial complex associated like 2	-2.03047	1.97e-06
FEN1	flap structure-specific endonuclease 1	-2.0263	3.65e-07
LMNB2	lamin B2	-2.02074	1.8e-07
BIRC5	baculoviral IAP repeat containing 5	-2.00205	1.21e-05
CKAP2L	cytoskeleton associated protein 2 like	-1.99988	3.3e-06
CDK1	cyclin dependent kinase 1	-1.98311	4.92e-06
HNRNPD	heterogeneous nuclear ribonucleoprotein D	-1.96199	1.3e-05
PAPPA	pappalysin 1	-1.94965	4.33e-06
ANLN	anillin actin binding protein	-1.9428	2.54e-06
TFPI2	tissue factor pathway inhibitor 2	-1.92628	1.76e-05
MCM3	minichromosome maintenance complex component 3	-1.92594	1.75e-06
PBK	PDZ binding kinase	-1.9242	2.25e-06
DNAJC9	DnaJ heat shock protein family (Hsp40) member C9	-1.90406	1.39e-05
FBXO5	F-box protein 5	-1.89131	7.36e-06
PLEK2	pleckstrin 2	-1.89022	1.84e-06
MCM4	minichromosome maintenance complex component 4	-1.87398	1.25e-05
MDK	midkine (neurite growth-promoting factor 2)	-1.86834	6.85e-07
CDCA3	cell division cycle associated 3	-1.86833	4.35e-06
AURKB	aurora kinase B	-1.86782	7.69e-07
BUB1	BUB1 mitotic checkpoint serine/threonine kinase	-1.86445	1.37e-06
CRABP2	cellular retinoic acid binding protein 2	-1.86052	1.68e-06
GALNT12	polypeptide N-acetylgalactosaminyltransferase 12	-1.83983	7.06e-08
CENPF	centromere protein F	-1.83681	7.47e-07
DNMT1	DNA (cytosine-5-)-methyltransferase 1	-1.82679	3.15e-05
HJURP	Holliday junction recognition protein	-1.81359	8.22e-08
NT5E	5'-nucleotidase ecto	-1.80871	0.000467
CDC25B	cell division cycle 25B	-1.80687	4.07e-06
FAM64A	family with sequence similarity 64 member A	-1.80558	2.17e-07
CDKN3	cyclin dependent kinase inhibitor 3	-1.80479	1.99e-05
COL22A1	collagen type XXII alpha 1 chain	-1.79905	3.13e-06
RRM1	ribonucleotide reductase catalytic subunit M1	-1.78717	5.15e-07
OAF	out at first homolog	-1.7791	7.67e-05
ADIRF	adipogenesis regulatory factor	-1.77892	1.73e-05
PTPRF	protein tyrosine phosphatase, receptor type F	-1.77806	1.31e-05
LMO2	LIM domain only 2	-1.77353	4.62e-07
CD55	CD55 molecule (Cromer blood group)	-1.76599	2.21e-05
ADGRG1	adhesion G protein-coupled receptor G1	-1.76428	1.38e-07
MN1	MN1 proto-oncogene, transcriptional regulator	-1.76258	6.45e-05
CDCP1	CUB domain containing protein 1	-1.74151	6.6e-08
NCEH1	neutral cholesterol ester hydrolase 1	-1.74131	2.2e-06
PDE7B	phosphodiesterase 7B	-1.73691	0.000218
RHOBTB3	Rho related BTB domain containing 3	-1.73685	2.61e-07
HMGB2	high mobility group box 2	-1.73655	0.000115
APCDD1L	APC down-regulated 1 like	-1.72986	1.56e-05
IGFBP5	insulin like growth factor binding protein 5	-1.7265	5.42e-06
EXOSC9	exosome component 9	-1.72494	3.68e-07
NEK2	NIMA related kinase 2	-1.7179	0.000203
ENG	endoglin	-1.71787	0.000179
FGL2	fibrinogen like 2	-1.70842	2.15e-06
TEK	TEK receptor tyrosine kinase	-1.70776	3.78e-07
ANPEP	alanyl aminopeptidase, membrane	-1.70628	9.49e-05
CD44	CD44 molecule (Indian blood group)	-1.70413	0.000121
SPC24	SPC24, NDC80 kinetochore complex component	-1.68161	1.88e-07
ADORA2B	adenosine A2b receptor	-1.67081	9.9e-07
HS3ST3A1	heparan sulfate-glucosamine 3-sulfotransferase 3A1	-1.6699	4.91e-07
EFHD2	EF-hand domain family member D2	-1.66641	4.44e-07
DLGAP5	DLG associated protein 5	-1.65284	2.78e-06
ZMIZ1	zinc finger MIZ-type containing 1	-1.65086	0.00158
MCM10	minichromosome maintenance 10 replication initiation factor	-1.64924	2.03e-06
SRSF2	serine and arginine rich splicing factor 2	-1.63566	1.55e-05
HMGN2	high mobility group nucleosomal binding domain 2	-1.63515	2.03e-05
KIF23	kinesin family member 23	-1.63374	3.23e-06
TPX2	TPX2, microtubule nucleation factor	-1.63324	2.57e-06
CYP2S1	cytochrome P450 family 2 subfamily S member 1	-1.63186	7.93e-06
CREB3L2	cAMP responsive element binding protein 3 like 2	-1.6264	5.09e-05
STMN1	stathmin 1	-1.6202	5.14e-06
GRB14	growth factor receptor bound protein 14	-1.61742	1.29e-05
CCNF	cyclin F	-1.61582	8.88e-06
LAMA4	laminin subunit alpha 4	-1.59889	2.26e-05
KPNA2	karyopherin subunit alpha 2	-1.59698	2.61e-07
CHSY1	chondroitin sulfate synthase 1	-1.59339	2.66e-06
E2F7	E2F transcription factor 7	-1.59244	1.88e-06
RAD51AP1	RAD51 associated protein 1	-1.58527	3.24e-06
PLK4	polo like kinase 4	-1.58427	1.43e-07
KIF2C	kinesin family member 2C	-1.5823	1.72e-05
CDCA4	cell division cycle associated 4	-1.5814	6.11e-06
ZNF185	zinc finger protein 185 (LIM domain)	-1.57827	1.1e-06
TRMT5	tRNA methyltransferase 5	-1.57793	9.16e-07
PTGS2	prostaglandin-endoperoxide synthase 2	-1.56999	3.44e-05
RACGAP1	Rac GTPase activating protein 1	-1.55794	1.72e-06
KIF20B	kinesin family member 20B	-1.55783	4.13e-05
IL33	interleukin 33	-1.55657	0.000111
BTG3	BTG anti-proliferation factor 3	-1.5533	2.48e-05
CYP1B1	cytochrome P450 family 1 subfamily B member 1	-1.5503	0.00057
TUBB4B	tubulin beta 4B class IVb	-1.54842	7.26e-05
CIRBP	cold inducible RNA binding protein	-1.54819	0.000473
MTHFD1L	methylenetetrahydrofolate dehydrogenase (NADP+ dependent) 1-like	-1.54355	2.15e-06
TTK	TTK protein kinase	-1.53003	3.33e-05
TOMM40	translocase of outer mitochondrial membrane 40	-1.52997	2.92e-05
CDCA8	cell division cycle associated 8	-1.52854	2.15e-06
NRIP3	nuclear receptor interacting protein 3	-1.52307	3.3e-06
MCM5	minichromosome maintenance complex component 5	-1.52159	3.14e-06
PAMR1	peptidase domain containing associated with muscle regeneration 1	-1.52156	4.17e-05
ID2	inhibitor of DNA binding 2, HLH protein	-1.5101	0.000571
DRAP1	DR1 associated protein 1	-1.50728	0.000374
MYO10	myosin X	-1.50404	0.00258
POLR2A	RNA polymerase II subunit A	-1.50182	0.00561
SH2B3	SH2B adaptor protein 3	-1.49972	2.25e-05
FOXM1	forkhead box M1	-1.49887	1.1e-06
NKD2	naked cuticle homolog 2	-1.49788	7.68e-06
FXYD5	FXYD domain containing ion transport regulator 5	-1.4948	1.37e-06
TUBA1C	tubulin alpha 1c	-1.48639	3.73e-06
SDC1	syndecan 1	-1.48444	1.27e-05
C19orf48	chromosome 19 open reading frame 48	-1.48287	3.35e-05
RANGAP1	Ran GTPase activating protein 1	-1.4727	4.09e-07
MARCKSL1	MARCKS like 1	-1.47116	0.000755
MCM2	minichromosome maintenance complex component 2	-1.46966	1.93e-05
IL13RA2	interleukin 13 receptor subunit alpha 2	-1.46203	5.15e-07
UBE2T	ubiquitin conjugating enzyme E2 T	-1.45854	2.03e-05
AXL	AXL receptor tyrosine kinase	-1.45841	3.67e-05
HEY2	hes related family bHLH transcription factor with YRPW motif 2	-1.45336	3.1e-07
HMMR	hyaluronan mediated motility receptor	-1.45221	7.74e-07
CDK2	cyclin dependent kinase 2	-1.45217	4.43e-05
FAM171A1	family with sequence similarity 171 member A1	-1.44545	0.00012
GK	glycerol kinase	-1.44206	1.62e-05
H2AFZ	H2A histone family member Z	-1.43726	4.11e-05
TACC3	transforming acidic coiled-coil containing protein 3	-1.43086	4.93e-07
FST	follistatin	-1.42929	0.000124
SEL1L3	SEL1L family member 3	-1.42724	0.00016
EBNA1BP2	EBNA1 binding protein 2	-1.42216	8.05e-07
ADAM19	ADAM metallopeptidase domain 19	-1.41067	3.04e-06
NCAPD2	non-SMC condensin I complex subunit D2	-1.40615	2.2e-05
ZWINT	ZW10 interacting kinetochore protein	-1.40258	1.34e-05
RRP7A	ribosomal RNA processing 7 homolog A	-1.40209	1.96e-05
TUBA1A	tubulin alpha 1a	-1.40191	3.78e-06
NUSAP1	nucleolar and spindle associated protein 1	-1.40018	5.8e-06
HCFC1	host cell factor C1	-1.39944	0.000579
DCBLD2	discoidin, CUB and LCCL domain containing 2	-1.39079	4.91e-07
POLA2	DNA polymerase alpha 2, accessory subunit	-1.38945	2.95e-06
H3F3C	H3 histone, family 3C	-1.38716	3.46e-05
NPTX1	neuronal pentraxin 1	-1.38695	0.0109
FGF2	fibroblast growth factor 2	-1.38238	1.54e-05
POC1A	POC1 centriolar protein A	-1.37924	9.08e-05
SUV39H1	suppressor of variegation 3-9 homolog 1	-1.36438	3.43e-05
SYNCRIP	synaptotagmin binding cytoplasmic RNA interacting protein	-1.35707	2.03e-05
STIL	SCL/TAL1 interrupting locus	-1.35254	8.64e-05
DPYSL3	dihydropyrimidinase like 3	-1.34856	1.83e-05
BDNF	brain derived neurotrophic factor	-1.34457	3.83e-05
TSPAN13	tetraspanin 13	-1.34008	0.000136
SPOCD1	SPOC domain containing 1	-1.33647	5.5e-05
TOX2	TOX high mobility group box family member 2	-1.3352	0.000379
DEPDC1	DEP domain containing 1	-1.33272	4.81e-05
SLC14A1	solute carrier family 14 member 1 (Kidd blood group)	-1.33128	5.15e-07
CSTF3	cleavage stimulation factor subunit 3	-1.33073	1.69e-05
FHL2	four and a half LIM domains 2	-1.32909	7.72e-05
KIFC1	kinesin family member C1	-1.32773	7.95e-07
CCNB1	cyclin B1	-1.32703	0.00035
TSPAN8	tetraspanin 8	-1.32664	0.00033
SPC25	SPC25, NDC80 kinetochore complex component	-1.32622	1.02e-06
FSCN1	fascin actin-bundling protein 1	-1.31352	1.75e-06
IL4R	interleukin 4 receptor	-1.30697	4.76e-06
PCNA	proliferating cell nuclear antigen	-1.30664	0.00145
KDM2B	lysine demethylase 2B	-1.30639	5.88e-05
KLF4	Kruppel like factor 4	-1.30498	0.00694
CENPK	centromere protein K	-1.30196	9.49e-05
NDC80	NDC80, kinetochore complex component	-1.29869	0.000139
ARHGDIA	Rho GDP dissociation inhibitor alpha	-1.2908	0.000277
RANBP1	RAN binding protein 1	-1.28803	3.36e-06
LRIG1	leucine rich repeats and immunoglobulin like domains 1	-1.28528	0.000114
FJX1	four jointed box 1	-1.27959	1.59e-05
HMOX1	heme oxygenase 1	-1.27796	3.12e-05
DACT1	dishevelled binding antagonist of beta catenin 1	-1.27532	9.21e-05
SHPK	sedoheptulokinase	-1.2746	6.89e-06
SOX17	SRY-box 17	-1.27313	0.000146
SMAD3	SMAD family member 3	-1.273	4.99e-05
PAICS	phosphoribosylaminoimidazole carboxylase; phosphoribosylaminoimidazolesuccinocarboxamide synthase	-1.27271	1.29e-06
ITPRIP	inositol 1,4,5-trisphosphate receptor interacting protein	-1.27218	2.6e-05
EXO1	exonuclease 1	-1.27139	1.17e-05
SERTAD2	SERTA domain containing 2	-1.27018	5.42e-06
TSKU	tsukushi, small leucine rich proteoglycan	-1.26412	7.72e-05
PAQR4	progestin and adipoQ receptor family member 4	-1.2633	0.000523
LOC146880	Rho GTPase activating protein 27 pseudogene	-1.25903	1.23e-05
SRRM2	serine/arginine repetitive matrix 2	-1.25675	0.014
MELK	maternal embryonic leucine zipper kinase	-1.25631	1.19e-05
SKA1	spindle and kinetochore associated complex subunit 1	-1.24441	6.74e-06
LRP8	LDL receptor related protein 8	-1.24415	1.82e-05
TNFRSF12A	TNF receptor superfamily member 12A	-1.2439	0.0021
MCM6	minichromosome maintenance complex component 6	-1.24354	8.64e-05
STC1	stanniocalcin 1	-1.24141	0.000408
OIP5	Opa interacting protein 5	-1.24041	1.78e-06
MMP16	matrix metallopeptidase 16	-1.24012	1.69e-05
TIMELESS	timeless circadian clock	-1.23969	1.63e-05
NUDT1	nudix hydrolase 1	-1.23758	0.00041
HPRT1	hypoxanthine phosphoribosyltransferase 1	-1.23613	1.63e-05
NOP56	NOP56 ribonucleoprotein	-1.23091	1.37e-06
SAC3D1	SAC3 domain containing 1	-1.21946	0.00387
TMEM131	transmembrane protein 131	-1.21586	0.000804
GINS3	GINS complex subunit 3	-1.21552	3.28e-06
PARP1	poly(ADP-ribose) polymerase 1	-1.21471	3.19e-05
CENPN	centromere protein N	-1.21373	2.49e-05
ASF1B	anti-silencing function 1B histone chaperone	-1.21155	1.72e-06
RGS20	regulator of G-protein signaling 20	-1.21071	1.46e-05
CENPE	centromere protein E	-1.21037	0.00638
CHAF1B	chromatin assembly factor 1 subunit B	-1.20868	4.2e-05
FABP5	fatty acid binding protein 5	-1.20842	7.81e-05
POLE2	DNA polymerase epsilon 2, accessory subunit	-1.20749	1.07e-05
EWSR1	EWS RNA binding protein 1	-1.20641	8.11e-06
CSE1L	chromosome segregation 1 like	-1.20618	0.000138
ECT2	epithelial cell transforming 2	-1.20462	0.0023
ADGRL2	adhesion G protein-coupled receptor L2	-1.20311	0.000162
IER3	immediate early response 3	-1.20041	0.00292
GFPT2	glutamine-fructose-6-phosphate transaminase 2	-1.1966	0.000125
CDT1	chromatin licensing and DNA replication factor 1	-1.19549	0.00074
WLS	wntless Wnt ligand secretion mediator	-1.19199	3.8e-05
KHDRBS1	KH RNA binding domain containing, signal transduction associated 1	-1.18696	0.000121
NUP62	nucleoporin 62	-1.18616	0.000103
CHAMP1	chromosome alignment maintaining phosphoprotein 1	-1.18223	0.000743
SEMA3A	semaphorin 3A	-1.17851	5.35e-05
CYGB	cytoglobin	-1.17777	0.000381
SF3B4	splicing factor 3b subunit 4	-1.177	0.00296
FOXD1	forkhead box D1	-1.17671	0.000674
CENPA	centromere protein A	-1.17421	6.15e-05
RFC4	replication factor C subunit 4	-1.17361	2.43e-05
KIF14	kinesin family member 14	-1.16991	7.95e-07
PLCXD1	phosphatidylinositol specific phospholipase C X domain containing 1	-1.16928	4.8e-05
CLIC1	chloride intracellular channel 1	-1.16836	0.0135
PLK1	polo like kinase 1	-1.16447	0.000153
TROAP	trophinin associated protein	-1.16378	8.66e-07
CDH2	cadherin 2	-1.16252	0.000291
CKS2	CDC28 protein kinase regulatory subunit 2	-1.16074	2.93e-05
FLNB	filamin B	-1.16068	0.000624
FOSL1	FOS like 1, AP-1 transcription factor subunit	-1.16062	3.12e-05
TUBA3D	tubulin alpha 3d	-1.15914	0.0087
DTL	denticleless E3 ubiquitin protein ligase homolog	-1.15876	7.46e-05
RNASEH2A	ribonuclease H2 subunit A	-1.1553	7.72e-05
RPL39L	ribosomal protein L39 like	-1.15361	3.28e-06
BCL3	B-cell CLL/lymphoma 3	-1.15334	0.00158
SH3KBP1	SH3 domain containing kinase binding protein 1	-1.1525	2.08e-05
PPP1R14B	protein phosphatase 1 regulatory inhibitor subunit 14B	-1.14817	1.33e-05
RBM14	RNA binding motif protein 14	-1.14814	0.000127
CBFB	core-binding factor beta subunit	-1.14412	0.00226
PRIM1	primase (DNA) subunit 1	-1.14105	8.64e-05
FANCG	Fanconi anemia complementation group G	-1.1396	0.000386
PKIA	protein kinase (cAMP-dependent, catalytic) inhibitor alpha	-1.13938	0.000179
ENO2	enolase 2	-1.1379	1.96e-05
CDCA7	cell division cycle associated 7	-1.13693	2.78e-06
LMNA	lamin A/C	-1.13652	0.000276
SRRM1	serine and arginine repetitive matrix 1	-1.13452	0.00151
PRR11	proline rich 11	-1.13382	4.36e-06
GMNN	geminin, DNA replication inhibitor	-1.1323	0.000922
SLIT2	slit guidance ligand 2	-1.13163	4.9e-05
TUBB	tubulin beta class I	-1.13141	1.11e-05
STEAP3	STEAP3 metalloreductase	-1.13118	0.000162
USP1	ubiquitin specific peptidase 1	-1.13016	1.09e-05
VASN	vasorin	-1.12763	0.00584
NAV1	neuron navigator 1	-1.12527	0.00131
CKS1B	CDC28 protein kinase regulatory subunit 1B	-1.12352	2.77e-05
FOXF1	forkhead box F1	-1.12297	0.00011
RRM2	ribonucleotide reductase regulatory subunit M2	-1.12268	6.51e-07
RAB27B	RAB27B, member RAS oncogene family	-1.11942	0.000244
HNRNPR	heterogeneous nuclear ribonucleoprotein R	-1.1106	0.000283
RAC2	ras-related C3 botulinum toxin substrate 2 (rho family, small GTP binding protein Rac2)	-1.10784	0.000907
POLQ	DNA polymerase theta	-1.10774	1.04e-05
CMIP	c-Maf inducing protein	-1.10705	0.000294
SMS	spermine synthase	-1.10579	4.11e-05
GREM2	gremlin 2, DAN family BMP antagonist	-1.1023	1.36e-05
TXNDC12	thioredoxin domain containing 12	-1.1017	0.000197
DONSON	downstream neighbor of SON	-1.10137	5.91e-05
CASP2	caspase 2	-1.10093	4.13e-05
DDX39A	DEAD-box helicase 39A	-1.10082	1.05e-05
DDX39B	DEAD-box helicase 39B	-1.09649	0.00551
SLC7A11	solute carrier family 7 member 11	-1.09609	2.37e-05
GBP4	guanylate binding protein 4	-1.09021	9.24e-07
SERPINB2	serpin family B member 2	-1.08886	0.000314
PRRC2C	proline rich coiled-coil 2C	-1.08805	0.00806
LYPD1	LY6/PLAUR domain containing 1	-1.08397	1.19e-05
NOL12	nucleolar protein 12	-1.083	0.00028
PPM1F	protein phosphatase, Mg2+/Mn2+ dependent 1F	-1.08194	0.000887
DDIT4L	DNA damage inducible transcript 4 like	-1.08118	4.3e-06
APOA1	apolipoprotein A1	-1.08036	0.000767
ILF3	interleukin enhancer binding factor 3	-1.07982	6.31e-06
GPR4	G protein-coupled receptor 4	-1.07878	1.35e-06
SPDL1	spindle apparatus coiled-coil protein 1	-1.07668	2.49e-05
HSPB11	heat shock protein family B (small) member 11	-1.07395	3.24e-05
CACYBP	calcyclin binding protein	-1.07324	0.000153
KNTC1	kinetochore associated 1	-1.07086	7.93e-06
HGS	hepatocyte growth factor-regulated tyrosine kinase substrate	-1.06972	0.000751
BAIAP2L2	BAI1 associated protein 2 like 2	-1.06783	9.38e-05
FANCD2	Fanconi anemia complementation group D2	-1.06735	0.000237
SAE1	SUMO1 activating enzyme subunit 1	-1.06718	2e-05
WNK4	WNK lysine deficient protein kinase 4	-1.0669	1.77e-05
CKAP2	cytoskeleton associated protein 2	-1.06663	2.38e-05
DDIAS	DNA damage induced apoptosis suppressor	-1.06558	1.08e-05
ORC6	origin recognition complex subunit 6	-1.06545	3.19e-05
HNRNPA2B1	heterogeneous nuclear ribonucleoprotein A2/B1	-1.0642	0.00033
HNRNPM	heterogeneous nuclear ribonucleoprotein M	-1.06365	0.000173
ACOT7	acyl-CoA thioesterase 7	-1.06127	3.91e-05
NOL6	nucleolar protein 6	-1.05995	1.93e-05
NCOR2	nuclear receptor corepressor 2	-1.05788	0.0101
PPP1R15A	protein phosphatase 1 regulatory subunit 15A	-1.0539	0.000162
PATL1	PAT1 homolog 1, processing body mRNA decay factor	-1.05184	7.39e-05
ABHD17C	abhydrolase domain containing 17C	-1.05147	0.000114
HNRNPUL1	heterogeneous nuclear ribonucleoprotein U like 1	-1.05038	0.000237
CCDC34	coiled-coil domain containing 34	-1.0496	0.000139
CBX5	chromobox 5	-1.049	8.56e-05
PI16	peptidase inhibitor 16	-1.04857	0.00868
BCL2L12	BCL2 like 12	-1.04756	0.000301
PSMD2	proteasome 26S subunit, non-ATPase 2	-1.0467	0.000239
SLC22A23	solute carrier family 22 member 23	-1.04269	0.000218
SF3A2	splicing factor 3a subunit 2	-1.04239	0.000713
KCTD12	potassium channel tetramerization domain containing 12	-1.03821	0.000431
BRD9	bromodomain containing 9	-1.03716	2.01e-05
NUP188	nucleoporin 188	-1.03537	0.000231
CDCA2	cell division cycle associated 2	-1.03476	7.93e-06
ARHGEF10	Rho guanine nucleotide exchange factor 10	-1.0319	0.000613
TRRAP	transformation/transcription domain associated protein	-1.03047	0.00927
LRR1	leucine rich repeat protein 1	-1.03044	0.000374
GATAD2A	GATA zinc finger domain containing 2A	-1.02677	0.000132
RFC3	replication factor C subunit 3	-1.02568	5.63e-06
NCAPG2	non-SMC condensin II complex subunit G2	-1.02538	3.04e-06
TMEM200A	transmembrane protein 200A	-1.02413	0.00165
FRMD4A	FERM domain containing 4A	-1.01449	2.25e-06
SPRED1	sprouty related EVH1 domain containing 1	-1.01289	0.000361
ITGA2	integrin subunit alpha 2	-1.01111	3.12e-05
PA2G4	proliferation-associated 2G4	-1.01109	0.000442
PDXP	pyridoxal phosphatase	-1.00984	0.000385
FAM111A	family with sequence similarity 111 member A	-1.00783	3.56e-06
BARD1	BRCA1 associated RING domain 1	-1.00446	1.35e-05
EPB41L3	erythrocyte membrane protein band 4.1 like 3	-1.00352	2.07e-05
NDRG4	NDRG family member 4	-1.00307	0.00021
DSTN	destrin, actin depolymerizing factor	1.00049	0.00605
OPN3	opsin 3	1.00139	0.00048
HTR2B	5-hydroxytryptamine receptor 2B	1.00497	6.22e-05
HTATIP2	HIV-1 Tat interactive protein 2	1.00507	3.6e-06
CTDSPL	CTD small phosphatase like	1.00722	0.000596
OGN	osteoglycin	1.00817	2.25e-06
NPC2	NPC intracellular cholesterol transporter 2	1.00891	0.000428
FSTL3	follistatin like 3	1.00962	0.00166
ASNS	asparagine synthetase (glutamine-hydrolyzing)	1.01187	6.39e-05
TRIM22	tripartite motif containing 22	1.01318	0.00373
GDE1	glycerophosphodiester phosphodiesterase 1	1.01349	0.000925
GSTM2	glutathione S-transferase mu 2 (muscle)	1.01397	1.1e-05
ACOT13	acyl-CoA thioesterase 13	1.01899	0.00028
SNRPN	small nuclear ribonucleoprotein polypeptide N	1.01936	0.000195
LAMP2	lysosomal associated membrane protein 2	1.01953	1.15e-05
SLC25A23	solute carrier family 25 member 23	1.02267	0.00146
ENDOD1	endonuclease domain containing 1	1.02434	3.95e-05
ANKRD46	ankyrin repeat domain 46	1.02604	3.58e-05
CDKN1C	cyclin dependent kinase inhibitor 1C	1.02867	9.62e-05
UBE2E2	ubiquitin conjugating enzyme E2 E2	1.02979	1.82e-05
TRAK2	trafficking kinesin protein 2	1.03162	1.68e-06
SCRN1	secernin 1	1.0327	0.000259
KIF13B	kinesin family member 13B	1.03432	1.79e-05
SLC35A1	solute carrier family 35 member A1	1.03588	6.05e-05
ARSB	arylsulfatase B	1.03783	0.000549
GLRB	glycine receptor beta	1.04062	0.000126
DTNA	dystrobrevin alpha	1.04068	5.22e-06
FOXN3	forkhead box N3	1.04149	0.00206
RRAGD	Ras related GTP binding D	1.04166	6.96e-06
KLF9	Kruppel like factor 9	1.04328	1.49e-05
SORBS1	sorbin and SH3 domain containing 1	1.04587	0.00051
SMOC2	SPARC related modular calcium binding 2	1.04836	0.000129
TPD52L1	tumor protein D52-like 1	1.04942	6.85e-05
ARMCX3	armadillo repeat containing, X-linked 3	1.05064	4.66e-07
GPAM	glycerol-3-phosphate acyltransferase, mitochondrial	1.05107	1.1e-05
KRT7	keratin 7	1.05148	2.49e-05
SH3D19	SH3 domain containing 19	1.05339	0.000425
HENMT1	HEN1 methyltransferase homolog 1	1.0549	2.25e-06
NME3	NME/NM23 nucleoside diphosphate kinase 3	1.05929	2e-05
ANGPTL1	angiopoietin like 1	1.06109	1.75e-06
TCEAL8	transcription elongation factor A like 8	1.06216	2.72e-05
ANG	angiogenin	1.06328	0.00035
KDELR3	KDEL endoplasmic reticulum protein retention receptor 3	1.06411	0.000249
ANKRD33	ankyrin repeat domain 33	1.06564	0.00236
NEO1	neogenin 1	1.06603	6.25e-05
ROR2	receptor tyrosine kinase like orphan receptor 2	1.06606	5.16e-06
RABAC1	Rab acceptor 1	1.0694	0.000595
C1orf54	chromosome 1 open reading frame 54	1.07103	2.16e-05
ABHD14A	abhydrolase domain containing 14A	1.07122	9e-05
TNFRSF14	TNF receptor superfamily member 14	1.0718	5.12e-06
ZMAT3	zinc finger matrin-type 3	1.07447	0.0027
IL1R1	interleukin 1 receptor type 1	1.07532	0.000637
CPE	carboxypeptidase E	1.07735	0.00089
GPD1L	glycerol-3-phosphate dehydrogenase 1-like	1.07979	5.61e-06
TYMP	thymidine phosphorylase	1.08083	0.000344
COBLL1	cordon-bleu WH2 repeat protein like 1	1.08284	0.000996
HSPB1	heat shock protein family B (small) member 1	1.0852	0.000596
PROK1	prokineticin 1	1.08534	3.28e-06
ANGPTL2	angiopoietin like 2	1.08664	0.000129
PLPP1	phospholipid phosphatase 1	1.08789	9.45e-06
NFIL3	nuclear factor, interleukin 3 regulated	1.09338	1.44e-05
PCYOX1	prenylcysteine oxidase 1	1.09525	0.000145
TMEM216	transmembrane protein 216	1.09629	0.00146
ALAD	aminolevulinate dehydratase	1.09985	0.000258
C6orf48	chromosome 6 open reading frame 48	1.09986	3.28e-06
HEBP1	heme binding protein 1	1.1017	0.00039
CNOT8	CCR4-NOT transcription complex subunit 8	1.10246	0.0001
MXRA7	matrix remodeling associated 7	1.10508	7.02e-05
PRRG1	proline rich and Gla domain 1	1.10514	2.06e-05
CHST7	carbohydrate sulfotransferase 7	1.10544	3.8e-06
MID1	midline 1	1.10734	0.000231
ITGA1	integrin subunit alpha 1	1.10871	9.27e-06
COMMD6	COMM domain containing 6	1.10898	0.000426
CMPK1	cytidine/uridine monophosphate kinase 1	1.11363	0.00028
PMP22	peripheral myelin protein 22	1.11533	2.69e-05
SERPING1	serpin family G member 1	1.11563	0.00478
FTH1	ferritin heavy chain 1	1.11721	0.000247
SERF2	small EDRK-rich factor 2	1.11752	0.0161
HSD17B12	hydroxysteroid 17-beta dehydrogenase 12	1.11821	0.000398
COL8A2	collagen type VIII alpha 2 chain	1.11834	0.00157
ZMYM6	zinc finger MYM-type containing 6	1.11955	2.97e-05
OAS2	2'-5'-oligoadenylate synthetase 2	1.12341	0.00987
DIRAS2	DIRAS family GTPase 2	1.12426	2.19e-06
SMPDL3A	sphingomyelin phosphodiesterase acid like 3A	1.12523	7.37e-05
WISP2	WNT1 inducible signaling pathway protein 2	1.13774	3.28e-06
GPR137B	G protein-coupled receptor 137B	1.14713	1.02e-06
PCMTD1	protein-L-isoaspartate (D-aspartate) O-methyltransferase domain containing 1	1.15092	0.000115
GABARAPL1	GABA type A receptor associated protein like 1	1.15129	2.99e-05
HLA-E	major histocompatibility complex, class I, E	1.15541	1.65e-05
IRS2	insulin receptor substrate 2	1.1597	0.00304
SLC15A3	solute carrier family 15 member 3	1.16199	2.72e-06
LBH	limb bud and heart development	1.16215	0.000235
CTSD	cathepsin D	1.16491	0.00453
SRGN	serglycin	1.16505	2.93e-05
MAP1LC3A	microtubule associated protein 1 light chain 3 alpha	1.16938	0.000905
CST3	cystatin C	1.16952	0.00145
SORBS2	sorbin and SH3 domain containing 2	1.16984	0.00022
SLMAP	sarcolemma associated protein	1.17037	8.39e-06
PIK3R1	phosphoinositide-3-kinase regulatory subunit 1	1.17241	0.000431
CCPG1	cell cycle progression 1	1.18046	9.92e-07
FBN2	fibrillin 2	1.18065	0.000247
RRAS	related RAS viral (r-ras) oncogene homolog	1.18615	0.00125
NNMT	nicotinamide N-methyltransferase	1.1879	0.000318
MYH11	myosin heavy chain 11	1.19356	0.00148
EIF4A2	eukaryotic translation initiation factor 4A2	1.19633	0.00367
LAMA2	laminin subunit alpha 2	1.1964	0.00111
DBNDD2	dysbindin domain containing 2	1.19641	3.38e-06
ATF4	activating transcription factor 4	1.20071	0.000213
LHFP	lipoma HMGIC fusion partner	1.20163	0.000857
UCHL1	ubiquitin C-terminal hydrolase L1	1.20324	1.47e-05
SAT1	spermidine/spermine N1-acetyltransferase 1	1.20398	0.000147
RNF217	ring finger protein 217	1.21063	6.3e-06
DHCR24	24-dehydrocholesterol reductase	1.21237	7.92e-05
ALOX5AP	arachidonate 5-lipoxygenase activating protein	1.21662	6.86e-05
KLHL24	kelch like family member 24	1.21918	2.91e-05
WNT5B	Wnt family member 5B	1.2238	1.08e-06
SELM	selenoprotein M	1.22728	8.15e-05
CEBPB	CCAAT/enhancer binding protein beta	1.23029	6.25e-05
GADD45A	growth arrest and DNA damage inducible alpha	1.23311	0.000287
SVEP1	sushi, von Willebrand factor type A, EGF and pentraxin domain containing 1	1.23391	0.00129
C1QTNF1	C1q and tumor necrosis factor related protein 1	1.23416	2.15e-06
EDNRB	endothelin receptor type B	1.23739	1.67e-05
OSBPL10	oxysterol binding protein like 10	1.23838	7.93e-06
SPON1	spondin 1	1.23951	1.11e-06
THBS1	thrombospondin 1	1.24589	0.00526
SEPTIN11	septin 11	1.25572	0.000285
TCEAL9	transcription elongation factor A like 9	1.2559	0.000192
COLEC11	collectin subfamily member 11	1.25628	5.07e-07
VGLL3	vestigial like family member 3	1.25773	5.58e-05
THY1	Thy-1 cell surface antigen	1.26026	0.000131
GCNT1	glucosaminyl (N-acetyl) transferase 1, core 2	1.26111	1.85e-05
TMEM50B	transmembrane protein 50B	1.26365	1.63e-05
PKP2	plakophilin 2	1.26727	1.25e-07
TPM2	tropomyosin 2 (beta)	1.26865	3.63e-05
TPST2	tyrosylprotein sulfotransferase 2	1.27144	5.22e-06
HACD1	3-hydroxyacyl-CoA dehydratase 1	1.27744	0.000928
GSTT1	glutathione S-transferase theta 1	1.27844	2.78e-06
CHSY3	chondroitin sulfate synthase 3	1.27955	1.31e-06
PLTP	phospholipid transfer protein	1.28396	0.000192
PGM1	phosphoglucomutase 1	1.28695	5.09e-06
CDKN2A	cyclin dependent kinase inhibitor 2A	1.28732	0.0139
DKK3	dickkopf WNT signaling pathway inhibitor 3	1.28994	1.19e-05
SPRY1	sprouty RTK signaling antagonist 1	1.29018	6.17e-06
JAZF1	JAZF zinc finger 1	1.29624	0.000126
YPEL5	yippee like 5	1.29812	0.000594
TMEM204	transmembrane protein 204	1.30002	0.00016
ACSL1	acyl-CoA synthetase long-chain family member 1	1.30143	0.000218
ARHGDIB	Rho GDP dissociation inhibitor beta	1.30408	0.000431
NUAK1	NUAK family kinase 1	1.30411	5.57e-05
ITPR1	inositol 1,4,5-trisphosphate receptor type 1	1.31251	6.52e-07
CROT	carnitine O-octanoyltransferase	1.31922	0.000194
MXD4	MAX dimerization protein 4	1.31945	7.16e-05
KCNK6	potassium two pore domain channel subfamily K member 6	1.31979	6.49e-05
STAT2	signal transducer and activator of transcription 2	1.32276	4.96e-06
PPARG	peroxisome proliferator activated receptor gamma	1.32502	3.44e-05
NRCAM	neuronal cell adhesion molecule	1.32508	1.78e-06
RAB8B	RAB8B, member RAS oncogene family	1.32653	1.42e-05
TSPAN9	tetraspanin 9	1.32671	1.9e-05
MTSS1	metastasis suppressor 1	1.33716	4.91e-07
ZNF106	zinc finger protein 106	1.33785	1.13e-05
DDAH1	dimethylarginine dimethylaminohydrolase 1	1.33825	0.000195
BEX3	brain expressed X-linked 3	1.33962	0.000237
ARHGEF6	Rac/Cdc42 guanine nucleotide exchange factor 6	1.34364	2.06e-05
LIMS2	LIM zinc finger domain containing 2	1.35223	9.55e-05
IFITM2	interferon induced transmembrane protein 2	1.35884	1.1e-05
GCHFR	GTP cyclohydrolase I feedback regulator	1.36403	7.62e-06
HSPB2	heat shock protein family B (small) member 2	1.36676	3.1e-07
RAMP1	receptor activity modifying protein 1	1.36768	1.56e-06
N4BP2L2	NEDD4 binding protein 2 like 2	1.36769	5.15e-07
ASS1	argininosuccinate synthase 1	1.37384	2.5e-06
DNAJB4	DnaJ heat shock protein family (Hsp40) member B4	1.37577	2.07e-05
PDPN	podoplanin	1.38208	2.36e-06
ENTPD1	ectonucleoside triphosphate diphosphohydrolase 1	1.38715	2.61e-06
CHN2	chimerin 2	1.38844	1.39e-05
CERS6	ceramide synthase 6	1.40002	1.15e-05
IFNGR1	interferon gamma receptor 1	1.40097	4.19e-05
SEC14L1	SEC14 like lipid binding 1	1.41001	2.49e-05
FOS	Fos proto-oncogene, AP-1 transcription factor subunit	1.41004	3.01e-05
PLA2G16	phospholipase A2 group XVI	1.41193	8.17e-06
IFI6	interferon alpha inducible protein 6	1.42402	2.91e-05
PRKD1	protein kinase D1	1.42431	1.19e-05
SLC35F5	solute carrier family 35 member F5	1.42694	0.000124
AXIN2	axin 2	1.43307	5.07e-07
TACSTD2	tumor-associated calcium signal transducer 2	1.43368	2.71e-07
S100A13	S100 calcium binding protein A13	1.43415	5.29e-06
SNAI2	snail family transcriptional repressor 2	1.43643	0.000136
TSPAN6	tetraspanin 6	1.43733	2.15e-05
MT1M	metallothionein 1M	1.43836	0.00151
HNMT	histamine N-methyltransferase	1.4402	1.09e-06
SOD2	superoxide dismutase 2, mitochondrial	1.4447	3.74e-06
S100A4	S100 calcium binding protein A4	1.45001	3.05e-06
GPNMB	glycoprotein nmb	1.45275	0.000444
ITGA11	integrin subunit alpha 11	1.45614	0.00863
FAXDC2	fatty acid hydroxylase domain containing 2	1.45783	1.32e-05
RFTN2	raftlin family member 2	1.45888	1.42e-06
FTH1P3	ferritin heavy chain 1 pseudogene 3	1.46129	0.0035
NINJ2	ninjurin 2	1.4629	0.000185
CITED2	Cbp/p300 interacting transactivator with Glu/Asp rich carboxy-terminal domain 2	1.46803	0.000452
JAM2	junctional adhesion molecule 2	1.46863	6.81e-05
CYB5R1	cytochrome b5 reductase 1	1.46892	1.51e-06
TMEM150A	transmembrane protein 150A	1.46952	1.29e-05
ANGPT1	angiopoietin 1	1.46972	8.69e-06
ADRA1B	adrenoceptor alpha 1B	1.4728	7.99e-06
HIST2H2AC	histone cluster 2, H2ac	1.47631	9.75e-05
HPS5	HPS5, biogenesis of lysosomal organelles complex 2 subunit 2	1.47641	3.68e-06
MSRB3	methionine sulfoxide reductase B3	1.47804	1.97e-06
CPED1	cadherin like and PC-esterase domain containing 1	1.47931	1.23e-05
TCEAL1	transcription elongation factor A like 1	1.48375	1.11e-05
MAN1C1	mannosidase alpha class 1C member 1	1.48519	2.93e-06
CYB5A	cytochrome b5 type A	1.48751	7.06e-05
SC5D	sterol-C5-desaturase	1.48996	5.46e-05
IFITM3	interferon induced transmembrane protein 3	1.49233	0.000191
CRISPLD2	cysteine rich secretory protein LCCL domain containing 2	1.49674	6.32e-05
RASD1	ras related dexamethasone induced 1	1.49836	0.000405
SPINT2	serine peptidase inhibitor, Kunitz type 2	1.49989	1.15e-05
UPP1	uridine phosphorylase 1	1.50056	2.91e-05
CALCOCO2	calcium binding and coiled-coil domain 2	1.50224	2.29e-07
ANKRD6	ankyrin repeat domain 6	1.50464	1.19e-05
CREG1	cellular repressor of E1A stimulated genes 1	1.50834	0.000188
DNAJB9	DnaJ heat shock protein family (Hsp40) member B9	1.51352	2.94e-07
SSPN	sarcospan	1.53355	1.39e-07
SUSD2	sushi domain containing 2	1.53608	0.000102
ARL6IP5	ADP ribosylation factor like GTPase 6 interacting protein 5	1.53664	1.07e-05
SUGCT	succinyl-CoA:glutarate-CoA transferase	1.53682	3.39e-06
C1S	complement component 1, s subcomponent	1.55133	1.27e-05
CPQ	carboxypeptidase Q	1.55321	3.92e-07
MGARP	mitochondria localized glutamic acid rich protein	1.55452	5.67e-06
TMEM47	transmembrane protein 47	1.55713	4.44e-05
PRSS23	protease, serine 23	1.55816	3.8e-05
IGFBP2	insulin like growth factor binding protein 2	1.55823	1.89e-05
CTSH	cathepsin H	1.56168	1.82e-05
MYO1D	myosin ID	1.56254	0.000239
LEPROT	leptin receptor overlapping transcript	1.56883	1.61e-05
SCPEP1	serine carboxypeptidase 1	1.57588	1e-05
PSAT1	phosphoserine aminotransferase 1	1.5844	2.58e-05
RSPO3	R-spondin 3	1.58504	0.000722
RHOQ	ras homolog family member Q	1.58965	5.15e-07
IFI44L	interferon induced protein 44 like	1.60238	0.00048
SFRP4	secreted frizzled related protein 4	1.60267	1.44e-05
MLPH	melanophilin	1.60305	1.83e-05
PALLD	palladin, cytoskeletal associated protein	1.61521	1.03e-05
PLXDC2	plexin domain containing 2	1.64075	3.15e-05
COL11A1	collagen type XI alpha 1 chain	1.65205	0.00404
H2AFJ	H2A histone family member J	1.65744	0.000235
PLAC9	placenta specific 9	1.65868	4.66e-08
IFITM1	interferon induced transmembrane protein 1	1.66207	0.000857
PLSCR4	phospholipid scramblase 4	1.66291	0.000103
GPC4	glypican 4	1.66996	5.15e-07
TMEM159	transmembrane protein 159	1.67688	3.39e-06
ZBTB16	zinc finger and BTB domain containing 16	1.67983	2.53e-07
FBLN5	fibulin 5	1.6799	6.21e-05
ECM2	extracellular matrix protein 2	1.69373	1.37e-06
ALDH1B1	aldehyde dehydrogenase 1 family member B1	1.70013	9.35e-06
GSN	gelsolin	1.70652	1.24e-05
HIST1H2AC	histone cluster 1, H2ac	1.71605	3.28e-06
OPTN	optineurin	1.7166	4.89e-06
OXTR	oxytocin receptor	1.74058	8.85e-08
GPM6B	glycoprotein M6B	1.74895	4.91e-07
OLFML3	olfactomedin like 3	1.75204	1.27e-05
RAB11FIP1	RAB11 family interacting protein 1	1.75877	1.2e-07
AKR1C3	aldo-keto reductase family 1, member C3	1.76852	5.53e-06
TMEM45A	transmembrane protein 45A	1.77289	2.04e-06
SLC46A3	solute carrier family 46 member 3	1.78521	1.52e-05
ADARB1	adenosine deaminase, RNA specific B1	1.78575	3.12e-05
C5orf46	chromosome 5 open reading frame 46	1.79212	5.44e-06
GSTM3	glutathione S-transferase mu 3	1.80367	5.15e-07
ADH1B	alcohol dehydrogenase 1B (class I), beta polypeptide	1.80593	6.64e-08
A2M	alpha-2-macroglobulin	1.81705	0.000393
PTN	pleiotrophin	1.82017	2.16e-05
CD302	CD302 molecule	1.83768	1.3e-05
ERRFI1	ERBB receptor feedback inhibitor 1	1.8388	4.35e-05
C1orf198	chromosome 1 open reading frame 198	1.84656	1.42e-05
RARRES3	retinoic acid receptor responder 3	1.84782	1.63e-07
MFGE8	milk fat globule-EGF factor 8 protein	1.86109	0.000237
SRPX2	sushi repeat containing protein, X-linked 2	1.86413	7.99e-05
WISP1	WNT1 inducible signaling pathway protein 1	1.86649	3.3e-06
OMD	osteomodulin	1.86866	2.47e-07
SGCG	sarcoglycan gamma	1.86935	5.07e-07
GLRX	glutaredoxin	1.87053	8.88e-06
ALCAM	activated leukocyte cell adhesion molecule	1.87153	0.000893
IL18R1	interleukin 18 receptor 1	1.87594	1.1e-07
PODN	podocan	1.88327	2.72e-05
TMTC1	transmembrane and tetratricopeptide repeat containing 1	1.88483	1.31e-06
TAGLN	transgelin	1.88494	8.57e-06
GREM1	gremlin 1, DAN family BMP antagonist	1.89537	0.00021
HSPB6	heat shock protein family B (small) member 6	1.90799	0.0144
CIDEC	cell death inducing DFFA like effector c	1.91275	9.69e-05
APOE	apolipoprotein E	1.91842	1.54e-05
CD14	CD14 molecule	1.93518	5.67e-06
SH3BGRL	SH3 domain binding glutamate rich protein like	1.94313	5.67e-05
CLIC3	chloride intracellular channel 3	1.9509	1.31e-06
HTRA1	HtrA serine peptidase 1	1.95801	0.00139
TCEAL3	transcription elongation factor A like 3	1.95812	7.97e-06
ANGPTL4	angiopoietin like 4	1.95902	3.67e-06
PLIN2	perilipin 2	1.96047	1.17e-06
CBS	cystathionine-beta-synthase	1.96599	3.67e-07
TEX2	testis expressed 2	1.97117	7.56e-07
CSRP2	cysteine and glycine rich protein 2	1.97226	0.000322
SERPINF1	serpin family F member 1	1.97278	1.28e-05
EFHD1	EF-hand domain family member D1	1.98246	5.09e-05
RARRES2	retinoic acid receptor responder 2	1.9866	1.25e-05
ELL2	elongation factor for RNA polymerase II 2	1.98957	1.1e-06
CNN1	calponin 1	1.99202	2.95e-06
DEPTOR	DEP domain containing MTOR-interacting protein	1.99653	9.76e-07
FAM46B	family with sequence similarity 46 member B	2.00226	7.02e-08
MGST1	microsomal glutathione S-transferase 1	2.00325	9.3e-06
HSPA2	heat shock protein family A (Hsp70) member 2	2.00814	3.73e-07
RPS29	ribosomal protein S29	2.01232	3.5e-05
CFD	complement factor D	2.01739	3.07e-05
ADM	adrenomedullin	2.02152	5.07e-07
RPS6KA2	ribosomal protein S6 kinase A2	2.02563	7.56e-07
ALPK2	alpha kinase 2	2.02667	1.68e-06
HIST2H2AA3	histone cluster 2, H2aa3	2.04522	0.000167
PPIC	peptidylprolyl isomerase C	2.05062	6.81e-06
SPARCL1	SPARC like 1	2.05691	3.04e-06
HIST1H2BD	histone cluster 1, H2bd	2.06814	1.63e-06
RASL11B	RAS like family 11 member B	2.07058	1.51e-07
FNDC1	fibronectin type III domain containing 1	2.0733	0.00437
FBLN1	fibulin 1	2.08918	1.88e-05
FMOD	fibromodulin	2.08982	4.24e-06
TCEAL4	transcription elongation factor A like 4	2.09209	2.24e-08
GRAMD3	GRAM domain containing 3	2.09297	3.07e-06
EPAS1	endothelial PAS domain protein 1	2.12892	3.28e-06
COL4A1	collagen type IV alpha 1 chain	2.13397	0.000337
HIST1H4H	histone cluster 1, H4h	2.13553	1.15e-06
CYBRD1	cytochrome b reductase 1	2.15074	9.92e-07
ITLN2	intelectin 2	2.19398	8.22e-08
FOXO1	forkhead box O1	2.20295	5.15e-07
GAS1	growth arrest specific 1	2.2172	3.1e-07
AOX1	aldehyde oxidase 1	2.22538	3.94e-06
RPRML	reprimo like	2.23141	3.48e-05
PDGFRB	platelet derived growth factor receptor beta	2.23884	8.78e-05
FHL1	four and a half LIM domains 1	2.24054	3.64e-07
MAMDC2	MAM domain containing 2	2.24328	3.47e-08
RAP2A	RAP2A, member of RAS oncogene family	2.24754	9.24e-07
LMCD1	LIM and cysteine rich domains 1	2.27308	8.66e-07
QPRT	quinolinate phosphoribosyltransferase	2.28014	3.28e-06
DDIT4	DNA damage inducible transcript 4	2.29513	1.65e-05
NEXN	nexilin F-actin binding protein	2.30722	1.54e-05
SEPP1	selenoprotein P, plasma, 1	2.3096	1.88e-06
NEDD9	neural precursor cell expressed, developmentally down-regulated 9	2.32223	6.51e-07
MYLK	myosin light chain kinase	2.33134	4.43e-06
C1QTNF5	C1q and tumor necrosis factor related protein 5	2.34534	8.61e-08
CFH	complement factor H	2.35206	3.47e-08
MFAP4	microfibrillar associated protein 4	2.3644	4.29e-05
NOX4	NADPH oxidase 4	2.37988	5.15e-07
IL1RL1	interleukin 1 receptor like 1	2.37995	2.55e-08
PRUNE2	prune homolog 2	2.4237	1.4e-06
ANKRD1	ankyrin repeat domain 1	2.4343	1.45e-06
MYL9	myosin light chain 9	2.43602	2.03e-06
MME	membrane metallo-endopeptidase	2.50813	4.02e-07
C6	complement component 6	2.52194	3.47e-08
SORT1	sortilin 1	2.5416	2.82e-07
TIMP4	TIMP metallopeptidase inhibitor 4	2.55017	1.78e-07
POSTN	periostin	2.56659	6.45e-05
METTL7A	methyltransferase like 7A	2.57449	5.13e-06
CTHRC1	collagen triple helix repeat containing 1	2.57773	2.25e-06
SERPINA5	serpin family A member 5	2.58726	4.56e-06
NUPR1	nuclear protein 1, transcriptional regulator	2.60761	6.83e-08
GLS	glutaminase	2.6126	1.26e-07
MMP23B	matrix metallopeptidase 23B	2.61272	5.07e-07
MT1X	metallothionein 1X	2.61893	3.28e-06
ATP8B4	ATPase phospholipid transporting 8B4 (putative)	2.63818	2.46e-06
HIST1H1C	histone cluster 1, H1c	2.67142	1.91e-06
TMEM119	transmembrane protein 119	2.67293	4.96e-06
DCN	decorin	2.71214	1.06e-07
TNFRSF11B	TNF receptor superfamily member 11b	2.72916	2.02e-08
CRYAB	crystallin alpha B	2.73285	6.83e-07
KCNT2	potassium sodium-activated channel subfamily T member 2	2.73345	2.85e-08
LMO3	LIM domain only 3	2.8059	4.66e-08
DUSP23	dual specificity phosphatase 23	2.80803	1.4e-07
ITLN1	intelectin 1	2.84718	1.06e-07
TXNIP	thioredoxin interacting protein	2.86003	2.51e-07
NPTX2	neuronal pentraxin 2	2.86577	3.43e-08
FKBP5	FK506 binding protein 5	2.88543	8.22e-08
BEX1	brain expressed X-linked 1	2.90658	3.06e-07
GAS6	growth arrest specific 6	2.9255	2.6e-06
C7	complement component 7	2.93012	1.8e-07
COX7A1	cytochrome c oxidase subunit 7A1	2.96742	2.47e-07
GPX3	glutathione peroxidase 3	2.9904	3.6e-06
C10orf10	chromosome 10 open reading frame 10	2.99164	1.19e-07
CCND2	cyclin D2	3.03072	2.24e-08
CD34	CD34 molecule	3.12565	2.93e-08
ACTA2	actin, alpha 2, smooth muscle, aorta	3.13327	1.78e-07
PTGDS	prostaglandin D2 synthase	3.1872	1.08e-05
HIST1H2BK	histone cluster 1, H2bk	3.20155	6e-08
CORIN	corin, serine peptidase	3.26512	7.93e-06
C11orf96	chromosome 11 open reading frame 96	3.27914	5.87e-07
PDE1A	phosphodiesterase 1A	3.29631	3.45e-07
PDGFD	platelet derived growth factor D	3.30199	4.66e-08
TSC22D3	TSC22 domain family member 3	3.31894	2.99e-07
COMP	cartilage oligomeric matrix protein	3.3207	5.06e-06
COL8A1	collagen type VIII alpha 1 chain	3.33495	2.39e-06
PROS1	protein S (alpha)	3.40196	7.13e-07
PLCXD3	phosphatidylinositol specific phospholipase C X domain containing 3	3.41089	2.93e-08
HSD11B1	hydroxysteroid 11-beta dehydrogenase 1	3.46825	2.55e-08
DPT	dermatopontin	3.69449	2.93e-08
ADH1A	alcohol dehydrogenase 1A (class I), alpha polypeptide	3.7308	6.64e-08
CTSK	cathepsin K	3.74935	3.1e-07
SAA1	serum amyloid A1	3.83865	2.46e-08
INMT	indolethylamine N-methyltransferase	3.842	7.91e-08
FBXO32	F-box protein 32	3.86383	2.72e-08
SLC40A1	solute carrier family 40 member 1	3.88134	1.19e-07
ACTG2	actin, gamma 2, smooth muscle, enteric	3.9847	9.67e-08
PPP1R14A	protein phosphatase 1 regulatory inhibitor subunit 14A	4.16545	2.02e-08
RGCC	regulator of cell cycle	4.18992	2.56e-07
STMN2	stathmin 2	4.2212	2.46e-08
SERPINA3	serpin family A member 3	4.24969	4.66e-08
LUM	lumican	4.32917	6.64e-08
MGP	matrix Gla protein	4.41286	2.56e-08
LEP	leptin	4.53767	2.61e-07
MAOA	monoamine oxidase A	4.86413	2.93e-08
APOD	apolipoprotein D	4.92084	7.62e-08
